# Supplementary material
Source: Royal Society of Chemistry journal article supplement (doi:10.1039/d6em00099a)
Supplement: d6em00099a1.pdf [file d6em00099a1.pdf]

Supporting information for

***Linking water–sediment respiration to micropollutant biodegradation across aquatic environments***

*Arild Gustafsson<sup>1\*</sup>, Joeselle M. Serrana<sup>1,2</sup>, Run Tian<sup>1,3</sup>, Michael S. McLachlan<sup>1</sup> & Malte Posselt<sup>1,2\*</sup>*

<sup>1</sup>Department of Environmental Science (ACES), Stockholm University, 11418 Stockholm, Sweden

<sup>2</sup>Stockholm University Center for Circular and Sustainable Systems (SUCCeSS), Stockholm University, 10691 Stockholm, Sweden

<sup>3</sup>Queensland Alliance for Environmental Health Science (QAEHS), The University of Queensland, 20 Cornwall Street, Woolloongabba, Queensland 4102, Australia

\*Corresponding authors: [arild.gustafsson@aces.su.se](mailto:arild.gustafsson@aces.su.se) & [malte.posselt@aces.su.se](mailto:malte.posselt@aces.su.se)

# Table of Contents

|                                                             |    |
|-------------------------------------------------------------|----|
| Table of Contents .....                                     | 2  |
| S1. Supporting information for materials and methods.....   | 3  |
| S1.1 Biochemical oxygen demand - respiration test.....      | 3  |
| S1.2 Modified OECD 309 biodegradation test.....             | 3  |
| S1.2.1 Studied compounds .....                              | 3  |
| S1.2.2 Incubation experiment procedure.....                 | 7  |
| S1.3 Instrumental analysis .....                            | 12 |
| S1.4 Data processing and compound identification.....       | 13 |
| S1.4.1 Compound identification .....                        | 13 |
| S1.4.2 Quality control and data processing.....             | 15 |
| S1.4.3 Data processing for abiotic controls .....           | 16 |
| S1.4.4 Statistical testing .....                            | 17 |
| S2. Supporting information on study results .....           | 18 |
| S2.1 Rate constants .....                                   | 18 |
| S2.2 Relationship between respiration and attenuation ..... | 23 |
| .....                                                       | 23 |
| S2.3 Peak area timeseries.....                              | 24 |
| S2.4 Dissipation in abiotic controls .....                  | 81 |
| S3. References .....                                        | 87 |

## S1. Supporting information for materials and methods

### S1.1 Biochemical oxygen demand - respiration test

To avoid oxygen consumption due to the oxidation of reduced inorganic species, sediments were aerated before the start of the test. Aeration was performed by bubbling air through the sediments with the help of rubber tubes.

Dissolved Oxygen (DO) was measured in triplicate before and after the incubation using a HQ2200 multi-meter (Hach Lange GmbH, Düsseldorf, Germany) for which the DO probe had been calibrated the same day. The average DO before and after incubation was then utilized to calculate the BOD<sub>3</sub> of each replicate utilizing Equation S1.

$$BOD_3 = DO_{day0} - DO_{day3}$$

**Equation S1.** Formula for calculating three-day Biochemical Oxygen Demand (BOD<sub>3</sub>).

### S1.2 Modified OECD 309 biodegradation test

#### S1.2.1 Studied compounds

The test compounds used in this study were a sub-set of the compounds used by Tian et al.<sup>1,2</sup>. The subset of compounds was selected based on their ability to be identified and yield quantifiable degradation rate constants (k)<sup>1,2</sup>. Information about the preparation of the working solution used to spike samples for this study can be found in the supporting information of Tian et al 2024<sup>2</sup>. In brief, tested compounds were hydrophilic organic micropollutants which had previously been shown to be minimally impacted by sorption<sup>2</sup>. While the spiking mix contained a total of 129 compounds, a subset of 47 low sorption, easily quantified compounds, were selected for analysis in the study. The 47 compounds spanned a wide range of uses including pharmaceuticals, pesticides, food additives, personal care product and industrial chemicals, as well as functional groups including sulfonamides, carboxylic acids, phenylureas, and carbamates. The test chemicals were purchased from Sigma-Aldrich (Steinheim, Germany), Toronto Research Chemicals Inc. (North York, Canada), and CDN Isotopes (Pointe- Claire, Quebec, Canada). Some compounds were acquired as gifts from Unilever. The concentration of the chemicals in the working solution was 1.75 µg/mL in Milli-Q IQ 7000 water (Merck KGaA, Darmstadt, Germany). The internal standard working solution had a concentration of 1 µg/mL in methanol of LC/MS grade (VWR International, Rosny-sous-Bois, France).

**Table S1.** List of compounds in the spiking mixture. Compounds in brackets were included in the mixture but not analyzed in the study.

| Compound name              | Use                            | log D <sub>ow</sub> <sup>I</sup> | pKa <sup>II</sup>   | CAS Nr      |
|----------------------------|--------------------------------|----------------------------------|---------------------|-------------|
| Ethylhexylglycerin         | Personal care products         | 2.4                              | 13.64 <sup>*a</sup> | 70445-33-9  |
| 4-(4-nitrobenzyl)-pyridine | Laboratory chemical            | 2.6                              | 5.51 <sup>*b</sup>  | 1083-48-3   |
| Anastrozole                | Pharmaceutical                 | 2.68                             | 1.4 <sup>b</sup>    | 33665-90-6  |
| Acesulfame                 | Food additive                  | -2.77                            | 2.0 <sup>a</sup>    | 120511-73-1 |
| Atrazine                   | Pesticide                      | 2.66                             | 4.2 <sup>b</sup>    | 1912-24-9   |
| Bezafibrate                | Pharmaceutical                 | -0.11                            | 3.83 <sup>*a</sup>  | 41859-67-0  |
| Bromoxynil                 | Pesticide                      | 3.77                             | 3.86 <sup>a</sup>   | 1689-84-5   |
| Caffeine                   | Natural product                | 0.28                             | -1.2 <sup>b</sup>   | 1958-08-02  |
| Candesartan                | Pharmaceutical                 | 0.04                             | 2.45 <sup>b</sup>   | 139481-59-7 |
| Carbamazepine              | Pharmaceutical                 | 2.28                             | 13.9 <sup>a</sup>   | 298-46-4    |
| Clofibric acid             | Pharmaceutical                 | -0.88                            | NA                  | 882-09-7    |
| Climbazole                 | Personal care products         | 3.32                             | 6.49 <sup>b</sup>   | 38083-17-9  |
| Chlortoluron               | Pesticide                      | 2.48                             | 14.43 <sup>*a</sup> | 15545-48-9  |
| Cyclamate                  | Food additive                  | -3.51                            | 1.7 <sup>b</sup>    | 100-88-9    |
| Dicamba                    | Pesticide                      | 1.24                             | 1.97 <sup>b</sup>   | 1918-00-9   |
| Diclofenac                 | Pharmaceutical                 | 1.37                             | 1.97 <sup>a</sup>   | 15307-86-5  |
| Dimethenamid               | Pesticide                      | 2.45                             | 1.16 <sup>b</sup>   | 87674-68-8  |
| Diuron                     | Pesticide                      | 0.13                             | NA                  | 330-54-1    |
| Fluconazole                | Pharmaceutical                 | 0.7                              | 1.76 <sup>b</sup>   | 86386-73-4  |
| Flufenacet                 | Pesticide                      | 3.01                             | 0.31 <sup>*a</sup>  | 142459-58-3 |
| Fenhexamid                 | Pesticide                      | 4.17                             | 7.3 <sup>a</sup>    | 126833-17-8 |
| Flecainide                 | Pharmaceutical                 | 1.01                             | 9.3 <sup>b</sup>    | 54143-55-4  |
| Furosemide                 | Pharmaceutical                 | -0.78                            | 3.65 <sup>a</sup>   | 54-31-9     |
| Fluoxetine                 | Pharmaceutical                 | 1.75                             | 9.8 <sup>*b</sup>   | 54910-89-3  |
| Gabapentin                 | Pharmaceutical                 | -1.4                             | 3.7 <sup>a</sup>    | 60142-96-3  |
| Gemfibrozil                | Pharmaceutical                 | 1.58                             | 4.5 <sup>a</sup>    | 25812-30-0  |
| Hydroxy bupropion          | Pharmaceutical<br>(metabolite) | 1.93                             | NA                  | 357399-43-0 |
| Iprovalicarb               | Pesticide                      | 3.29                             | 11.41 <sup>*a</sup> | 140923-17-7 |
| Isoproturon                | Pesticide                      | 2.45                             | 15.06 <sup>*a</sup> | 34123-59-6  |
| Ketoprofen                 | Pharmaceutical                 | 0.06                             | 3.98 <sup>a</sup>   | 22071-15-4  |
| MCPA                       | Pesticide                      | -1.09                            | 3.13 <sup>a</sup>   | 94-74-6     |
| Mecoprop                   | Pesticide                      | -0.65                            | 3.21 <sup>a</sup>   | 7085-19-0   |
| Mefenamic acid             | Pharmaceutical                 | 2.04                             | 4.2 <sup>a</sup>    | 61-68-7     |
| Metformin                  | Pharmaceutical                 | -3.36                            | 12.4 <sup>b</sup>   | 657-24-9    |
| Metolachlor                | Pesticide                      | 3.22                             | 1.45 <sup>a</sup>   | 51218-45-2  |
| Metoprolol                 | Pharmaceutical                 | -0.25                            | 9.56 <sup>b</sup>   | 51384-51-1  |
| Metoxuron                  | Pesticide                      | 1.87                             | 13.83 <sup>a</sup>  | 19937-59-8  |
| Naproxen                   | Pharmaceutical                 | 0.45                             | 4.15 <sup>a</sup>   | 22204-53-1  |
| p-toluenesulfonic acid     | Laboratory chemical            | -3.36                            | -1.34 <sup>a</sup>  | 104-15-4    |
| Sulfamethazine             | Pharmaceutical                 | 0.79                             | 7.59 <sup>a</sup>   | 57-68-1     |
| Sulfadimethoxine           | Pharmaceutical                 | -0.49                            | 6.91 <sup>*a</sup>  | 122-11-2    |
| Sulfamethoxazole           | Pharmaceutical                 | -0.56                            | 6.16 <sup>*a</sup>  | 723-46-6    |
| Tamsulosin                 | Pharmaceutical                 | 0.77                             | 9.28 <sup>*b</sup>  | 106133-20-4 |
| Terbutryn                  | Pesticide                      | 1.38                             | 4.30 <sup>b</sup>   | 886-50-0    |

|                                     |                        |       |                     |              |
|-------------------------------------|------------------------|-------|---------------------|--------------|
| Valsartan                           | Pharmaceutical         | -0.89 | 3.6 <sup>a</sup>    | 137862-53-4  |
| Venlafaxine                         | Pharmaceutical         | 1.43  | 9.5 <sup>b</sup>    | 93413-69-5   |
| Zolpidem                            | Pharmaceutical         | 3.06  | 5.65 <sup>b</sup>   | 82626-48-0   |
| (1-Stearoyl-rac-glycerol)           | Metabolite             | 2,6   | -                   | 123-94-4     |
| (Butylhydroxytoluene)               | Food preservative      | 5.07  | 11.6 <sup>*a</sup>  | 128-37-0     |
| (Alpha-isomethylionone)             | Personal care products | 4.22  | -                   | 127-51-5     |
| (Chloroxylonol)                     | Household chemical     | 2.83  | 9.7 <sup>b</sup>    | 88-04-0      |
| (5-Methylbenzotriazole)             | Industrial chemical    | 1.69  | 8.74 <sup>*b</sup>  | 136-85-6     |
| (Abacavir)                          | Pharmaceutical         | 1.32  | 5.8 <sup>*b</sup>   | 136470-78-5  |
| (Acetamiprid)                       | Pesticide              | 1.06  | 0.7 <sup>a</sup>    | 135410-20-7  |
| (Alachlor)                          | Pesticide              | 2.99  | 1.20 <sup>*a</sup>  | 15972-60-8   |
| (Amisulpride)                       | Pharmaceutical         | -0.43 | 9.37 <sup>b</sup>   | 71675-85-9   |
| (Atazanavir)                        | Pharmaceutical         | 4.61  | 4.42 <sup>*b</sup>  | 198904-31-3  |
| (Atenolol)                          | Pharmaceutical         | -1.85 | 9.58 <sup>b</sup>   | 29122-68-7   |
| (Azoxystrobin)                      | Pesticide              | 3.54  | 1.94 <sup>*b</sup>  | 131860-33-8  |
| (Benzotriazole)                     | Industrial chemical    | 1.5   | 8.37 <sup>b</sup>   | 95-14-7      |
| (Benzyl alcohol)                    | Laboratory chemical    | 4.85  | 15.4 <sup>a</sup>   | 100-51-6     |
| (Benzyl salicylate)                 | Personal care products | 4.01  | 8.11 <sup>*b</sup>  | 118-58-1     |
| (Bisoprolol)                        | Pharmaceutical         | 0.12  | 9.67 <sup>*b</sup>  | 66722-44-9   |
| (C12 Isethionate)                   | Personal care products | -     | -                   | 7381-01-3    |
| (Carbendazim)                       | Pesticide              | 1.51  | 4.29 <sup>b</sup>   | 10605-21-7   |
| (Chlorothiazide)                    | Pharmaceutical         | -0.21 | 4.29 <sup>a</sup>   | 58-94-6      |
| (Chlorthalidone)                    | Pharmaceutical         | 0.41  | 6.85 <sup>a</sup>   | 77-36-1      |
| (Cilastatin)                        | Pharmaceutical         | -1.9  | 9.14 <sup>*b</sup>  | 82009-34-5   |
| (Ciprofloxacin)                     | Pharmaceutical         | -2.23 | 8.77 <sup>*b</sup>  | 85721-33-1   |
| (Citalopram)                        | Pharmaceutical         | 1.27  | 9.78 <sup>b</sup>   | 59729-33-8   |
| (Cocoamidopropyl betaine)           | Personal care products | 0.93  | -                   | 61789-40-0   |
| (Decylamine)                        | Laboratory chemical    | 1.07  | 10.64 <sup>b</sup>  | 2016-57-1    |
| (Dibenzepin)                        | Pharmaceutical         | 1.24  | 8.23 <sup>b</sup>   | 4498-32-2    |
| (Diflufenican)                      | Pesticide              | 4.09  | 9.03 <sup>*b</sup>  | 83164-33-4   |
| (Diocetyl Sulfocinate Sodium Salt)  | Industrial chemical    | 1.01  | -0.75 <sup>*a</sup> | 10041-19-7   |
| (Dodecyl sulfate sodium salt)       | Personal care product  | 1.6   | -1.5 <sup>a</sup>   | 151-21-3     |
| (Dodecylamine)                      | Laboratory chemical    | 1.86  | 10.63 <sup>*b</sup> | 124-22-1     |
| (Dodecyltrimethylammonium chloride) | Industrial chemical    | -     | -                   | 112-00-5     |
| (Ethofumesate)                      | Pesticide              | 2.14  | -                   | 26225-79-6 2 |
| (Ethylene glycol butyl ether)       | Personal care products | 0.77  | 14.42 <sup>*a</sup> | 111-76-2     |
| (Ethylhexyl methoxycinnamate)       | Personal care products | 5.28  | -4.8 <sup>*b</sup>  | 5466-77-3    |
| (Ethylparaben)                      | Food preservative      | 2.48  | 8.34 <sup>a</sup>   | 120-47-8     |
| (Fenofibrate)                       | Pharmaceutical         | 5.01  | -4.9 <sup>*b</sup>  | 49562-28-9   |
| (Fipronil)                          | Pharmaceutical         | 3.71  | -5.86 <sup>b</sup>  | 120068-37-3  |
| (Fludioxonil)                       | Pesticide              | 2.57  | 14.10 <sup>a</sup>  | 131341-86-1  |
| (Fluoxetine)                        | Pharmaceutical         | 1.75  | 9.8 <sup>*b</sup>   | 54910-89-3   |
| (Galaxolide)                        | Personal care products | 5.93  | -                   | 1222-05-5    |
| (Hexylene glycol)                   | Personal care products | 0.23  | 15.10 <sup>a</sup>  | 107-41-5     |
| (Homosalate)                        | Personal care products | 5.23  | 9.72 <sup>*a</sup>  | 118-56-9     |
| (Hydrochlorothiazide)               | Pharmaceutical         | -0.01 | 7.9 <sup>a</sup>    | 58-93-5      |
| (Imidacloprid)                      | Pesticide              | -0.29 | 1.56 <sup>b</sup>   | 138261-41-3  |
| (Iodopropynyl butylcarbamate)       | Personal care products | 3.2   | 14.4 <sup>*a</sup>  | 55406-53-6   |
| (Irbesartan)                        | Pharmaceutical         | 1.24  | 5.85 <sup>*a</sup>  | 138402-11-6  |
| (Lamotrigine)                       | Pharmaceutical         | 1.68  | 5.7 <sup>b</sup>    | 84057-84-1   |

|                                             |                        |        |                     |             |
|---------------------------------------------|------------------------|--------|---------------------|-------------|
| (Levamisole)                                | Pharmaceutical         | 0.25   | 6.98 <sup>*b</sup>  | 14769-73-4  |
| (Levetiracetam)                             | Pharmaceutical         | -0.74  | -1.6 <sup>*b</sup>  | 102767-28-2 |
| (Lidocaine)                                 | Pharmaceutical         | 1.26   | 7.95 <sup>b</sup>   | 137-58-6    |
| (Linezolid)                                 | Pharmaceutical         | 0.82   | 1.8 <sup>b</sup>    | 165800-03-3 |
| (Losartan)                                  | Pharmaceutical         | 1.29   | 5.5 <sup>a</sup>    | 114798-26-4 |
| (Ioxynil)                                   | Pesticide              | 1.27   | 3.96 <sup>a</sup>   | 1689-83-4   |
| (Mefenamic acid)                            | Pharmaceutical         | 2.04   | 4.2 <sup>a</sup>    | 61-68-7     |
| (Methotrexate)                              | Pharmaceutical         | -5.22  | 4.7 <sup>a</sup>    | 59-05-2     |
| (Methyl 4-hydroxybenzoate)                  | Food preservative      | 2.09   | 8.5 <sup>a</sup>    | 99-76-3     |
| (N-(3-dimethylaminopropyl)-octadecanamide ) | Personal care products | 6.12   | 16.29 <sup>*a</sup> | 7651-02-7   |
| (N,N-bis(2hydroxyethyl) dodecanamide )      | Personal care products | 3.95   | 14.13 <sup>a</sup>  | 120-40-1    |
| (N,N-Bis(2-hydroxyethyl) tetradecanamide )  | Personal care products | 4.87   | -                   | 7545-23-5   |
| (Naphthalene-2-carbonitrile)                | Laboratory chemical    | 3.22   | -                   | 613-46-7    |
| (Neostigmine)                               | Pharmaceutical         | -2.77  | -                   | 59-99-4     |
| (Nicotinamide)                              | Personal care products | -0.37  | 3.35 <sup>b</sup>   | 98-92-0     |
| (Novobiocin)                                | Pharmaceutical         | -0.02  | 4.3 <sup>a</sup>    | 303-81-1    |
| (Oxazepam)                                  | Pharmaceutical         | 1.5    | 1.55 <sup>b</sup>   | 604-75-1    |
| (Oxprenolol)                                | Pharmaceutical         | 0.19   | 9.57 <sup>b</sup>   | 6452-71-7   |
| (Paracetamol)                               | Pharmaceutical         | 0.4    | 9.38 <sup>b</sup>   | 103-90-2    |
| (Pargyline)                                 | Pharmaceutical         | 2.31   | 8.05 <sup>*b</sup>  | 555-57-7    |
| (Picoxystrobin)                             | Pesticide              | 3.84   | -1.09 <sup>*a</sup> | 117428-22-5 |
| (Propachlor)                                | Pesticide              | 2.28   | 0.30 <sup>*a</sup>  | 1918-16-7   |
| (Propranolol)                               | Pharmaceutical         | 1.15   | 9.53 <sup>b</sup>   | 525-66-6    |
| (Propyl 4-hydroxybenzoate)                  | Personal care products | 2.81   | 8.5 <sup>a</sup>    | 94-13-3     |
| (Ranitidine)                                | Pharmaceutical         | -0.63  | 7.8 <sup>*b</sup>   | 66357-35-5  |
| (Rufinamide)                                | Pharmaceutical         | 0.42   | 12.64 <sup>a</sup>  | 106308-44-5 |
| (Sodium decyl sulfate)                      | Industrial chemical    | -      | -                   | 142-87-0    |
| (Sorbitan monolaurate)                      | Food additive          | 4.02   | -                   | 1338-39-2   |
| (Sotalol)                                   | Pharmaceutical         | -1.63  | 9.76 <sup>a</sup>   | 3930-20-9   |
| (Sulfamethoxypyridazine)                    | Pharmaceutical         | -0.29  | 6.84 <sup>*a</sup>  | 80-35-3     |
| (Sulfathiazole)                             | Pharmaceutical         | 0.03   | 7.2 <sup>a</sup>    | 72-14-0     |
| (Tartrazine)                                | Food additive          | -10.17 | -                   | 1934-21-0   |
| (Tetradecylamine)                           | Industrial chemical    | 3.05   | 10.62 <sup>a</sup>  | 2016-42-4   |
| (Tramadol)                                  | Pharmaceutical         | 0.52   | 9.41 <sup>b</sup>   | 27203-92-5  |
| (Triethyl citrate)                          | Personal care products | 1.09   | 11.82 <sup>a</sup>  | 77-93-0     |
| (Trimethoprim)                              | Pharmaceutical         | -1.15  | 7.12 <sup>b</sup>   | 738-70-5    |
| (Trinexapac-ethyl)                          | Pesticide              | -1.76  | 4.7 <sup>a</sup>    | 95266-40-3  |

<sup>I</sup> Values for compound log  $D_{ow}$  were obtained from ChemSpider.

<sup>II</sup> Values of compound pKa were obtained from PubChem. If unavailable, predicted values were obtained from DrugBank or ChemBK, marked with \*. Values are listed as: <sup>a</sup> acid pKa, or <sup>b</sup> base pKa.

**Table S2.** List of the 15 compounds used as internal standards.

---

| <b>Internal Standard name</b> |
|-------------------------------|
| Acesulfame-d4                 |
| Bezafibrate-d4                |
| Caffeine-d9                   |
| Carbamazepine-d8              |
| Clofibric acid-d4             |
| Fluconazole-d4                |
| Gabapentin-d6                 |
| Mecoprop-d3                   |
| Metformin-d6                  |
| Metoprolol-d7                 |
| Naproxen-d3                   |
| Sulfamethoxazole-d4           |
| Valsartan-d3                  |
| Venlafaxine-d6                |
| Zolpidem-d6                   |

---

### S1.2.2 Incubation experiment procedure

For biodegradation testing, the modified version of the OECD 309 protocol developed by Tian et al. was applied<sup>1</sup>. The protocol was altered slightly by increasing the spike concentration from 0.5 µg/L to 1 µg/L, as well as decreasing the water volume in the incubation flasks from 350 to 300 mL to match the capacity of the BOD bottles. The proportion of water to sediment was 50 g of wet sediment per L of water, the same proportion as was used by Tian et al.<sup>1</sup>. Approximately 15 g of sediment was weighed into 500 mL Erlenmeyer flasks. For sites F1, F2, F8, F9, and F10 sediment was weighed into a fourth flask to be used as a sorption control. 300 mL of water from the corresponding site was added to all flasks, and a fifth flask containing just 300 mL of water was prepared for sites F1, F8, F9, and F10 as hydrolysis controls. The sorption and hydrolysis control flasks were subsequently autoclaved for 30 min at 121°C to sterilize them. The opening of all flasks was covered with parafilm to prevent CO<sub>2</sub> outgassing during the incubation, which could impact sample pH.

After preparation the flasks were brought to a temperature-controlled room set to 4 °C and placed on a KS 501 digital orbital shaker (IKA-Werke GmbH & Co. KG, Staufen, Germany) at 100 rpm. The flasks were left on the shaker for 20 minutes to resuspend the sediment. Each flask was then spiked with a working solution of 129 micropollutants to a concentration of 1 µg/L. The degradation was monitored by taking 1.5 mL subsamples from each flask. The first time point, t<sub>0</sub>, was collected 20 min after spiking to ensure the compounds had been evenly mixed before subsampling. In total, subsamples were collected at 12 timepoints over 10 days. Subsamples were stored at -20 °C until analysis. The maximum storage time before analysis was approximately two months. During the incubation, DO, temperature, pH, and electrical conductivity were monitored in each flask using a HQ2200 multi-meter or a HQ40d multi-meter (Hach Lange GmbH, Düsseldorf, Germany), for which the probes had been calibrated the same day (Figure S1).

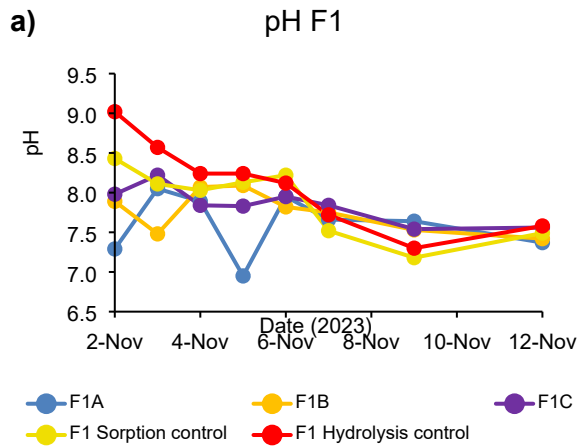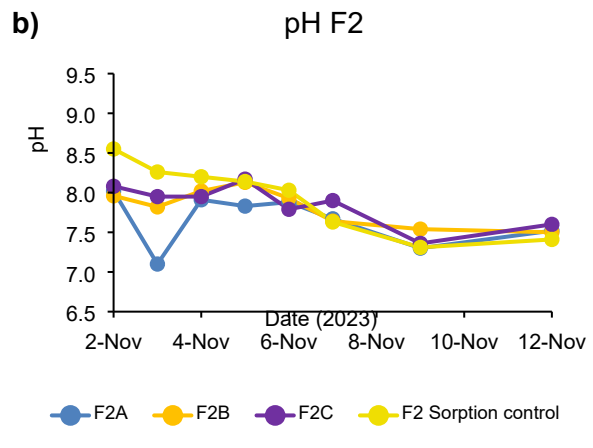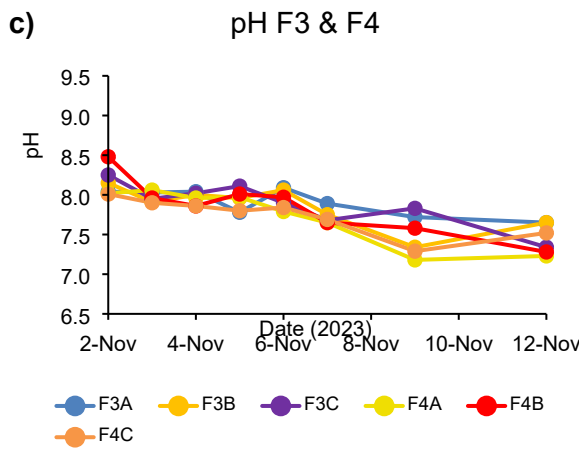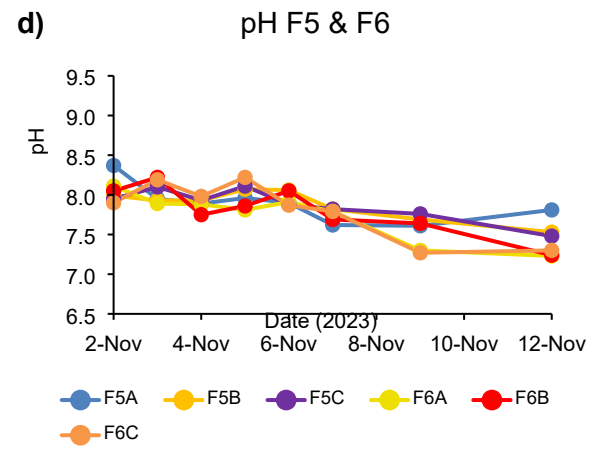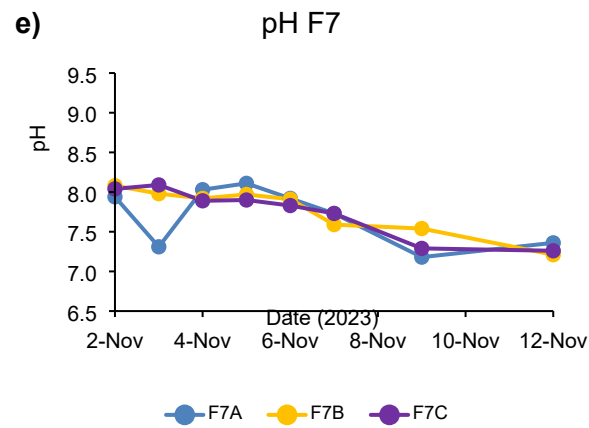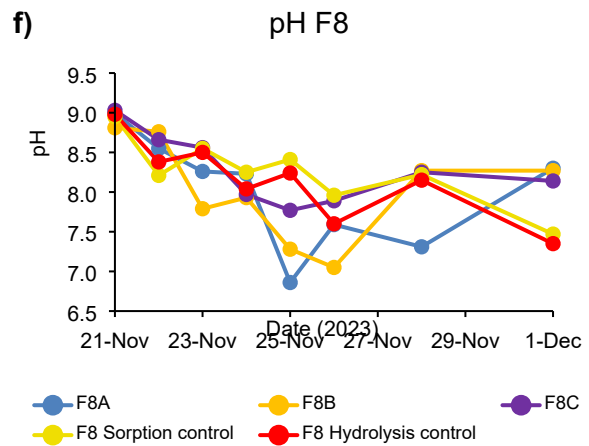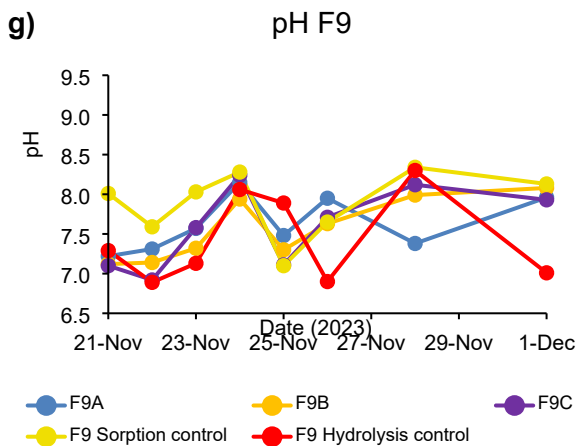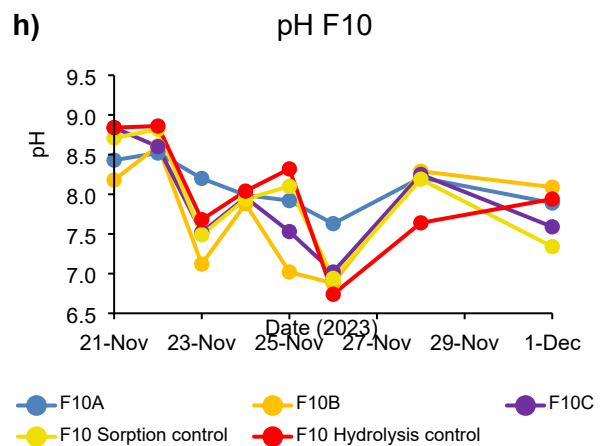

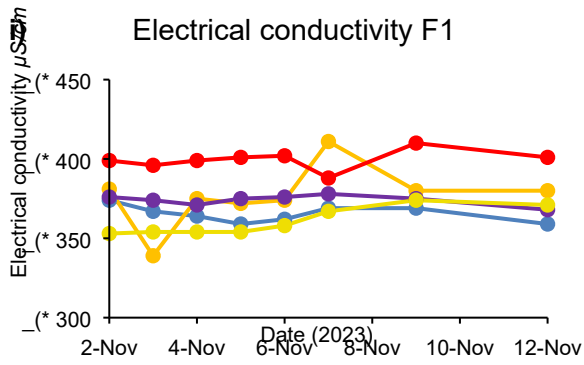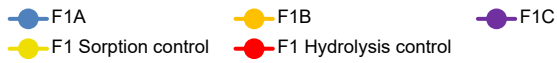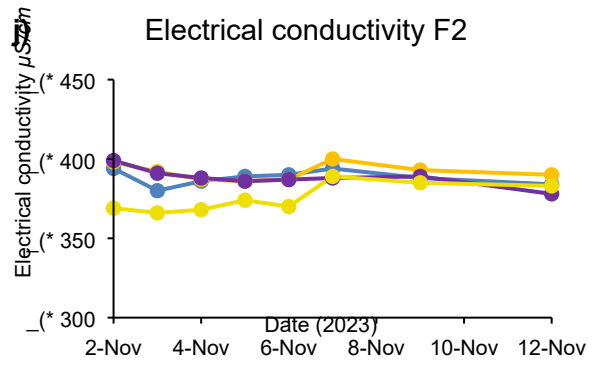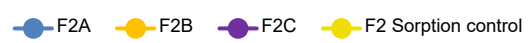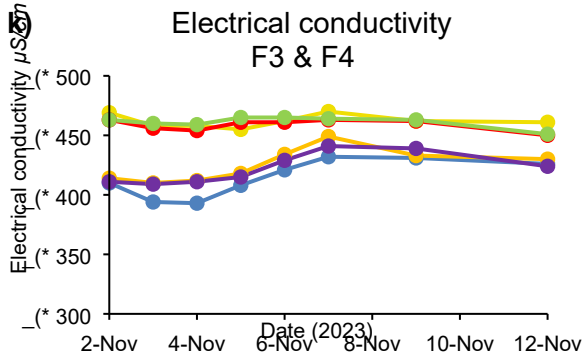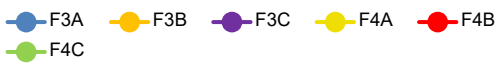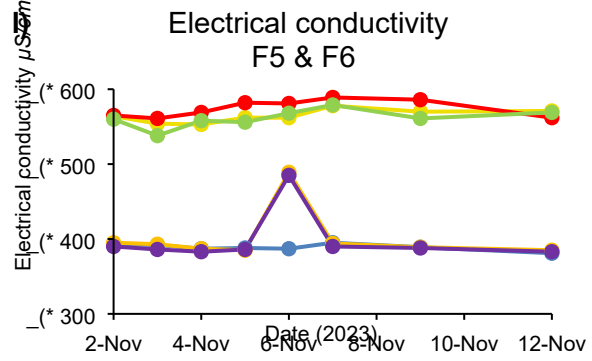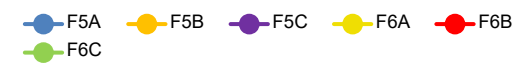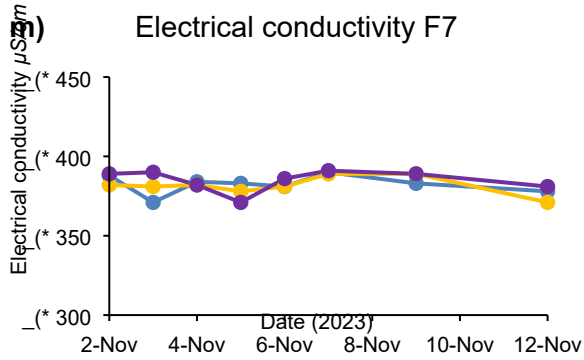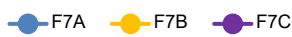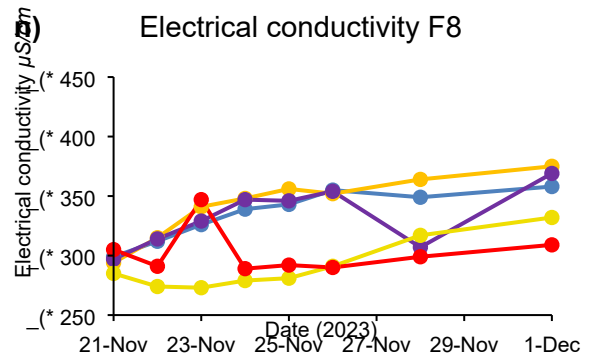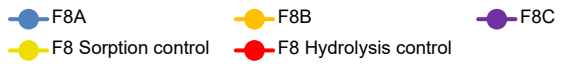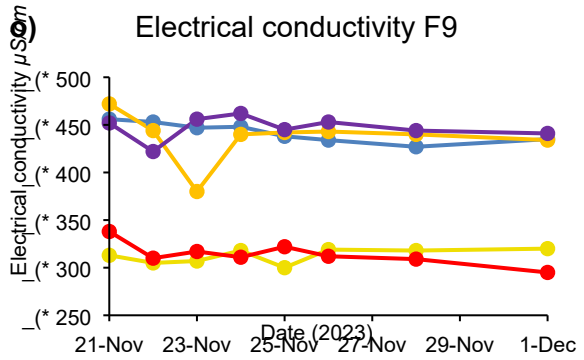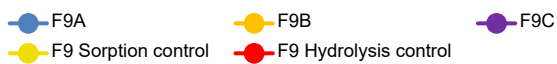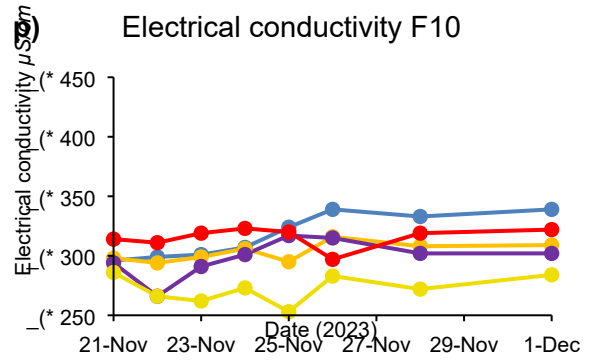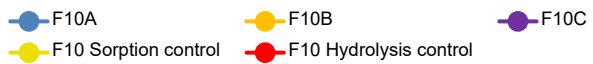

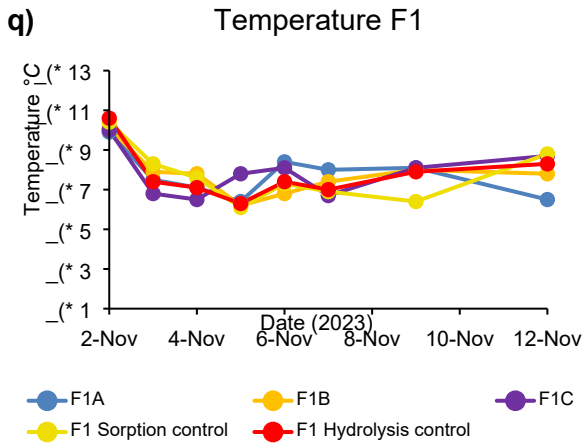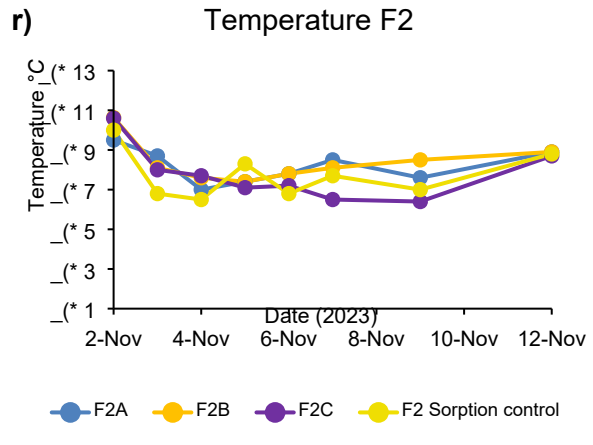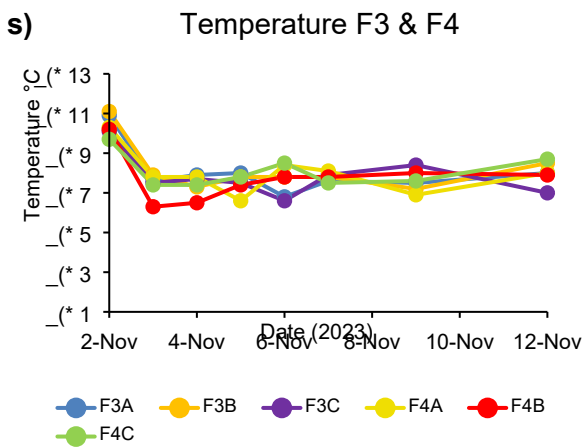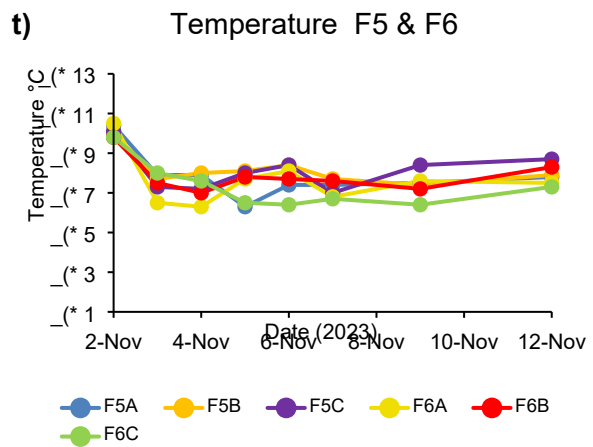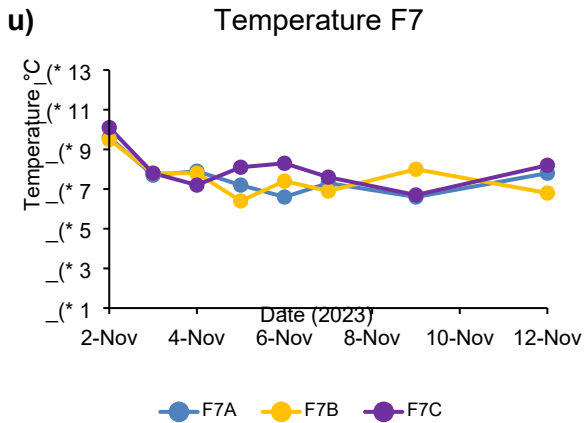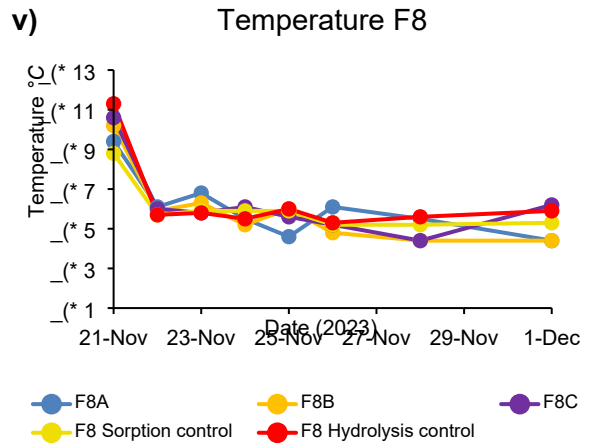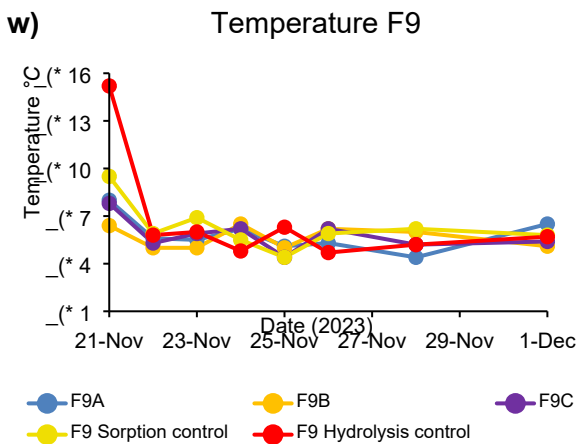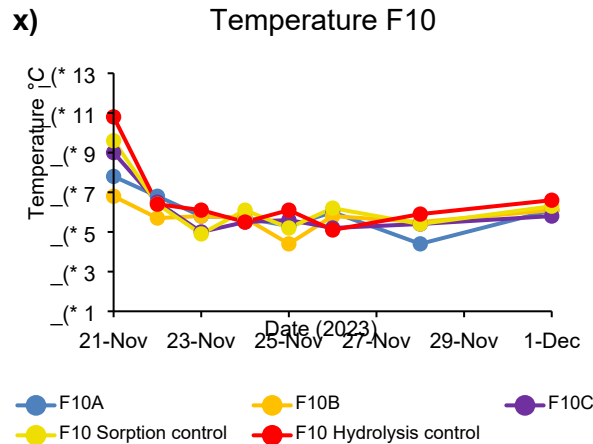

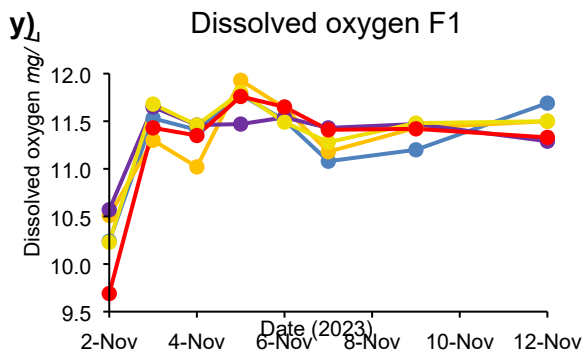

F1A F1B F1C  
F1 Sorption control F1 Hydrolysis control

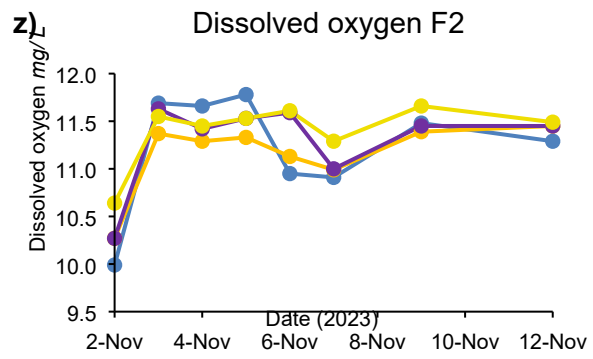

F2 Sorption control F2A F2B F2C

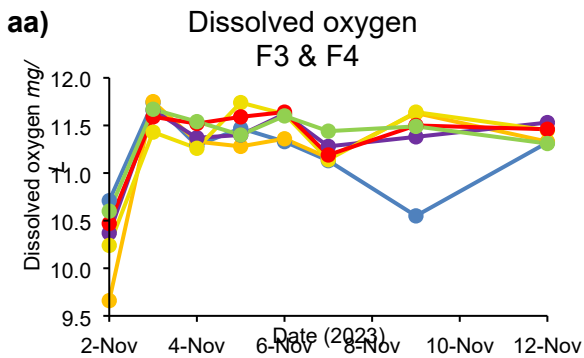

F3A F3B F3C F4A F4B  
F4C

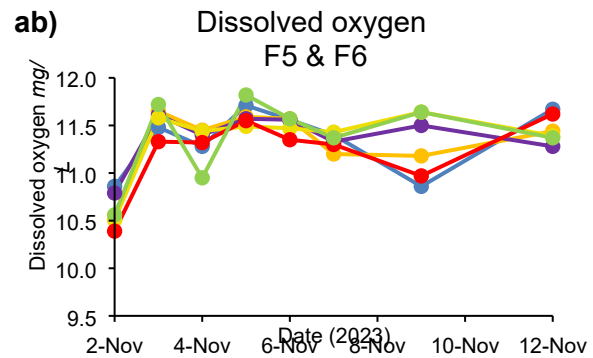

F5A F5B F5C F6A F6B  
F6C

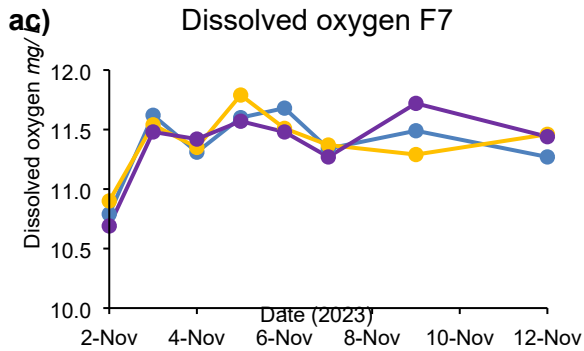

F7A F7B F7C

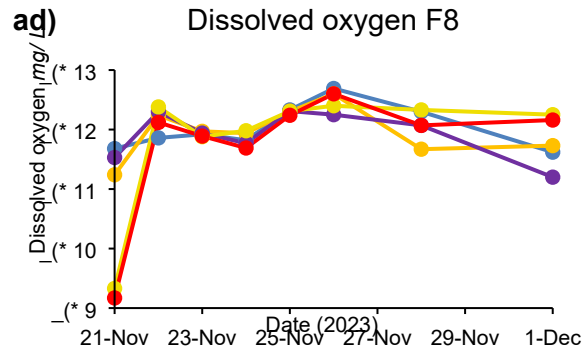

F8A F8B F8C  
F8 Sorption control F8 Hydrolysis control

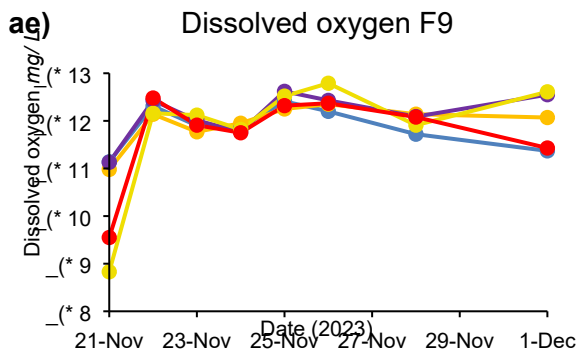

F9A F9B F9C  
F9 Sorption control F9 Hydrolysis control

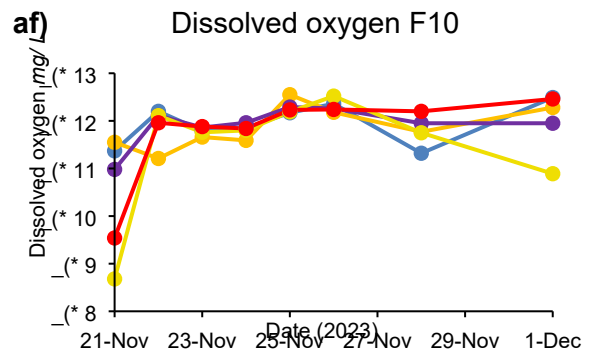

F10A F10B F10C  
F10 Sorption control F10 Hydrolysis control

**Figure S1.** Measurements of pH, dissolved oxygen (DO), electrical conductivity (EC), and temperature during the OECD 309 batch incubation for each replicate. **A-H** shows the trends in pH over the experiment, **I-P** shows the trends in EC during the incubation, **Q-X** shows the temperature trends during the incubation, **Y-AF** shows the trends in DO for the replicates during the incubation.

### S1.3 Instrumental analysis

Before analysis, the collected subsamples were thawed and vortexed, after which 800  $\mu\text{L}$  of sample was transferred into a 1.5 mL SafeSeal reaction tube (SARSTEDT AG & Co. KG, Nümbrecht, Germany) together with 190  $\mu\text{L}$  of methanol and 10  $\mu\text{L}$  of Internal standard (IS) mixture (Table S2). The mixture was then thoroughly vortexed and filtered through a 0.45  $\mu\text{m}$  PTFE filter (SARSTEDT AG & Co. KG, Nümbrecht, Germany) using a Henke-Ject syringe (Henke-Sass Wolf GmbH, Tuttlingen, Germany) into SureSTART 2 mL vials (Thermo Fisher Scientific, Langerwehe, Germany). The prepared samples were stored at  $-20\text{ }^{\circ}\text{C}$  until analysis. Alongside the samples, blanks, quality control samples (QCs), and standards were prepared. Blanks were prepared similarly to samples, except the 800  $\mu\text{L}$  of sample was replaced with 800  $\mu\text{L}$  of Milli-Q water. For the quality control samples, the 800  $\mu\text{L}$  of sample was replaced with water from site F1 that had been spiked in the same manner as the samples, but not incubated. A matrix matched standard curve was prepared for each sample site. The standards were prepared with water from the corresponding sample site, spiked with the same compound mixture as the samples (Table S1), and diluted to a concentration between 0.005  $\mu\text{g/L}$  - 10  $\mu\text{g/L}$  (0.005  $\mu\text{g/L}$ , 0.01  $\mu\text{g/L}$ , 0.02  $\mu\text{g/L}$ , 0.04  $\mu\text{g/L}$ , 0.06  $\mu\text{g/L}$ , 0.08  $\mu\text{g/L}$ , 0.1  $\mu\text{g/L}$ , 0.25  $\mu\text{g/L}$ , 0.5  $\mu\text{g/L}$ , 1  $\mu\text{g/L}$ , 2.5  $\mu\text{g/L}$ , 5  $\mu\text{g/L}$ , and 10  $\mu\text{g/L}$ ). As with the samples, blanks, and QCs, 190  $\mu\text{L}$  of methanol and 10  $\mu\text{L}$  of IS mixture were also added to each vial. The samples for each site were analysed as one batch, along with blanks, standards, and QCs. The utilized analytical instrumentation was ultrahigh performance liquid chromatography (UHPLC) coupled with a Q Exactive HF Hybrid Quadrupole-Orbitrap mass spectrometer (Orbitrap MS/MS, Thermo Fisher Scientific, Waltham, USA). 40  $\mu\text{L}$  from each vial was injected into the instrument, with three QCs injections at the start and end of each sequence along with one QC injection after every six other injections. The injection order of the samples was randomized.

For the UHPLC, an Aquity UPLC HSS T3 1.8  $\mu\text{m}$  2.1x100 mm reversed-phase column with an Aquity UPLC HSS T3 VanGuard 1.8  $\mu\text{m}$  2.1x5 mm precolumn (both Waters Corporation, Milford, USA) was utilized along with two mobile phases. Mobile phase A consisted of Milli-Q IQ 7000 water (Merck KGaA, Darmstadt, Germany) with 10 mM acetic acid (Sigma Aldrich Chemie GmbH, Steinheim, Germany), while mobile phase B consisted of methanol (VWR International, Rosny-sous-Bois, France) with 10 mM acetic acid (see supplier above). A 17 min gradient was used, starting at 95% A and linearly increased to 95% B for 10 min, which was then kept constant for 2 min. The gradient was then shifted back to 95% A over 0.1 min and maintained for the final 2.9 min. The flow rate of the mobile phases was 0.4 mL/min, and the column temperature was  $40\text{ }^{\circ}\text{C}$ . The samples were kept in the autosampler compartment at  $4\text{ }^{\circ}\text{C}$  for a maximum of 92 h. After being separated on the UHPLC, the samples entered the Orbitrap

MS/MS and were ionized using ESI. Each sample was injected twice, once in ESI positive mode, and once in ESI negative mode. The instrument was calibrated before analysis of each batch. Further information on the Orbitrap MS/MS settings are available in Table S3. To get accurate retention times for the 47 focus compounds, a retention time standard was analysed after the last samples. The standard contained the working solution diluted to 1 ppb in 790  $\mu\text{L}$  Milli-Q water, 190  $\mu\text{L}$  methanol and 10  $\mu\text{L}$  IS mixture.

**Table S3.** Mass spectrometer settings. **A** contains the settings for the MS and MS/MS scan. **B** contains the settings for the electrospray interface.

| <i>a)</i> | <b>Parameter</b>                             | <b>MS</b> | <b>MS/MS</b> |
|-----------|----------------------------------------------|-----------|--------------|
|           | Scan range <i>m/z</i>                        | 70-900    | -            |
|           | Resolution <i>full width at half maximum</i> | 120000    | 15000        |
|           | Automatic gain control (AGC) target          | 3000000   | 20000        |
|           | Maximum IT <i>ms</i>                         | 150       | 20           |

  

| <i>b)</i> | <b>Parameter</b>                                    | <b>Positive mode</b> | <b>Negative mode</b> |
|-----------|-----------------------------------------------------|----------------------|----------------------|
|           | Sheath gas flow rate                                | 50                   | 40                   |
|           | Auxiliary gas flow rate                             | 13                   | 10                   |
|           | Sweep gas flow rate                                 | 3                    | 0                    |
|           | Spray voltage $ kV $                                | 3.5                  | 3.5                  |
|           | Capillary temperature $^{\circ}\text{C}$            | 320                  | 320                  |
|           | S-lens RF-level                                     | 55                   | 55                   |
|           | Auxiliary gas heater temperature $^{\circ}\text{C}$ | 350                  | 300                  |

## S1.4 Data processing and compound identification

### S1.4.1 Compound identification

Raw files were processed using Compound Discoverer 3.3 (Thermo Fisher Scientific, Waltham, USA) to identify the target compounds. The Compound Discoverer workflow is the same as used by Tian et al, and is available in the supporting information of their 2023 paper<sup>1</sup>. Compounds were identified based on their MS/MS spectra and retention time (RT). The retention times were compared to the RTs of the retention time standard, with a difference of  $< \pm 0.2$  min considered a match. Some ISs could not be found in the RT standard; for these compounds the RT was instead compared to RT of the same compound measured previously using the same instrument and UHPLC method.

For compound identification, most targets were identified at a  $\geq 70\%$  MS/MS spectral match and a matching RT. Identification was also accepted in a few cases for compounds with a  $\geq$

50% MS/MS spectral match and a matching RT. For two spiked compounds, fluoxetine and ethylhexylglycerin, no matches to spectra in the libraries were found. However, only a single peak was detected at their respective molecular weight. As these peaks appeared at the expected RT in all samples, they were assumed to have matched the two compounds in question. The identification of these two compounds is therefore somewhat uncertain. An overview of compound identification is provided in Table S4. Two compounds, metformin and acesulfame, along with their respective IS, were identified by Compound Discoverer 3.3, but not properly integrated. They were, therefore, integrated manually based on their RT and molecular weight using the software Xcalibur (Thermo Fisher Scientific, Waltham, USA).

**Table S4.** Overview of compound identification for each site. The legend for the colour scheme is provided at the top of the table.

| Compound                   | ≥70% spectral match and matching RT |    | ≥50% spectral match and matching RT |    | No spectral match, matching molecular weight and RT |    | Not identified |    |    |     |
|----------------------------|-------------------------------------|----|-------------------------------------|----|-----------------------------------------------------|----|----------------|----|----|-----|
|                            | Site                                |    |                                     |    |                                                     |    |                |    |    |     |
|                            | F1                                  | F2 | F3                                  | F4 | F5                                                  | F6 | F7             | F8 | F9 | F10 |
| Ethylhexylglycerin         |                                     |    |                                     |    |                                                     |    |                |    |    |     |
| 4-(4-nitrobenzyl)-pyridine |                                     |    |                                     |    |                                                     |    |                |    |    |     |
| Acesulfame                 |                                     |    |                                     |    |                                                     |    |                |    |    |     |
| Anastrozole                |                                     |    |                                     |    |                                                     |    |                |    |    |     |
| Atrazine                   |                                     |    |                                     |    |                                                     |    |                |    |    |     |
| Bezafibrate                |                                     |    |                                     |    |                                                     |    |                |    |    |     |
| Bromoxynil                 |                                     |    |                                     |    |                                                     |    |                |    |    |     |
| Caffeine                   |                                     |    |                                     |    |                                                     |    |                |    |    |     |
| Candesartan                |                                     |    |                                     |    |                                                     |    |                |    |    |     |
| Carbamazepine              |                                     |    |                                     |    |                                                     |    |                |    |    |     |
| Chlortoluron               |                                     |    |                                     |    |                                                     |    |                |    |    |     |
| Climbazole                 |                                     |    |                                     |    |                                                     |    |                |    |    |     |
| Clofibric acid             |                                     |    |                                     |    |                                                     |    |                |    |    |     |
| Cyclamate                  |                                     |    |                                     |    |                                                     |    |                |    |    |     |
| Dicamba                    |                                     |    |                                     |    |                                                     |    |                |    |    |     |
| Diclofenac                 |                                     |    |                                     |    |                                                     |    |                |    |    |     |
| Dimethenamid               |                                     |    |                                     |    |                                                     |    |                |    |    |     |
| Diuron                     |                                     |    |                                     |    |                                                     |    |                |    |    |     |
| Fenhexamid                 |                                     |    |                                     |    |                                                     |    |                |    |    |     |
| Flecainide                 |                                     |    |                                     |    |                                                     |    |                |    |    |     |
| Fluconazole                |                                     |    |                                     |    |                                                     |    |                |    |    |     |
| Flufenacet                 |                                     |    |                                     |    |                                                     |    |                |    |    |     |
| Fluoxetine                 |                                     |    |                                     |    |                                                     |    |                |    |    |     |
| Furosemide                 |                                     |    |                                     |    |                                                     |    |                |    |    |     |
| Gabapentin                 |                                     |    |                                     |    |                                                     |    |                |    |    |     |
| Gemfibrozil                |                                     |    |                                     |    |                                                     |    |                |    |    |     |
| Hydroxy bupropion          |                                     |    |                                     |    |                                                     |    |                |    |    |     |
| Iprovalicarb               |                                     |    |                                     |    |                                                     |    |                |    |    |     |
| Isoproturon                |                                     |    |                                     |    |                                                     |    |                |    |    |     |
| Ketoprofen                 |                                     |    |                                     |    |                                                     |    |                |    |    |     |
| MCPA                       |                                     |    |                                     |    |                                                     |    |                |    |    |     |
| Mecoprop                   |                                     |    |                                     |    |                                                     |    |                |    |    |     |
| Mefenamic acid             |                                     |    |                                     |    |                                                     |    |                |    |    |     |
| Metformin                  |                                     |    |                                     |    |                                                     |    |                |    |    |     |
| Metolachlor                |                                     |    |                                     |    |                                                     |    |                |    |    |     |
| Metoprolol                 |                                     |    |                                     |    |                                                     |    |                |    |    |     |

|                        |  |  |  |  |  |  |  |  |  |  |
|------------------------|--|--|--|--|--|--|--|--|--|--|
| Metoxuron              |  |  |  |  |  |  |  |  |  |  |
| Naproxen               |  |  |  |  |  |  |  |  |  |  |
| p-toluenesulfonic acid |  |  |  |  |  |  |  |  |  |  |
| Sulfadimethoxine       |  |  |  |  |  |  |  |  |  |  |
| Sulfamethazine         |  |  |  |  |  |  |  |  |  |  |
| Sulfamethoxazole       |  |  |  |  |  |  |  |  |  |  |
| Tamsulosin             |  |  |  |  |  |  |  |  |  |  |
| Terbutryn              |  |  |  |  |  |  |  |  |  |  |
| Valsartan              |  |  |  |  |  |  |  |  |  |  |
| Venlafaxine            |  |  |  |  |  |  |  |  |  |  |
| Zolpidem               |  |  |  |  |  |  |  |  |  |  |
| Mecoprop-d3            |  |  |  |  |  |  |  |  |  |  |
| acesulfame-d4          |  |  |  |  |  |  |  |  |  |  |
| clofibric acid-d4      |  |  |  |  |  |  |  |  |  |  |
| caffeine-d9            |  |  |  |  |  |  |  |  |  |  |
| naproxen-d3            |  |  |  |  |  |  |  |  |  |  |
| gabapentin-d6          |  |  |  |  |  |  |  |  |  |  |
| Metformin-d6           |  |  |  |  |  |  |  |  |  |  |
| fluconazole-d4         |  |  |  |  |  |  |  |  |  |  |
| carbamazepine-d8       |  |  |  |  |  |  |  |  |  |  |
| Zolpidem-d6            |  |  |  |  |  |  |  |  |  |  |
| Venlafaxine-d6         |  |  |  |  |  |  |  |  |  |  |
| metoprolol-d7          |  |  |  |  |  |  |  |  |  |  |
| Sulfamethoxazole-d4    |  |  |  |  |  |  |  |  |  |  |
| valsartan-d3           |  |  |  |  |  |  |  |  |  |  |
| Bezafibrate-d4         |  |  |  |  |  |  |  |  |  |  |

#### S1.4.2 Quality control and data processing

For identified compounds, the peak areas were exported and corrected using an R-script called batchCorr developed by Brunius et al.<sup>3</sup>. It utilizes the repeatedly analysed QCs to correct for instrumental drift within a batch, thereby improving data quality. For site F4 and F5, one of the QCs had a much lower peak area than the others, possibly from instrumental errors or errors during preparation. As this would interfere with the batchCorr correction, the peak area of these QCs was replaced with the average peak area of the previous and following QC injections.

After running the data through batchCorr, the data quality was assured by checking that relative standard deviation (RSD) was below 25% in the QCs for spiked compounds and below 25% in all injections for IS compounds. A linear calibration curve was made for each spiked compound using the matrix-matched standards. The linear range was determined as the range of calibration standard concentrations for which the response factors of the calibration points had an RSD < 25%. The lowest concentration in the linear range was set as the limit of quantification (LOQ), and sample peak areas below the LOQ were removed. The peak areas were then transformed to the natural logarithm of the peak area relative to the peak area of the same compound at  $t_0$  (Equation S2).

$$\text{Transformed area} = \ln \frac{A_{\text{sample}}}{A_{\text{to sample}}}$$

**Equation S2.** Formula for calculating ln-transformed relative peak area.

The Chowclassifier script was utilized to calculate attenuation rate constants,  $k$ , from the slope of the linear regression of  $\ln(A/A_{t0})$  against subsampling time<sup>2</sup>. Chowclassifier additionally performs a Chow test to check for breakpoints where the degradation trend changes. If the test detects a breakpoint at the selected significance level, 0.01 in this case, then the script will calculate two separate linear regressions for the timepoints before and after the breakpoint respectively. If no breakpoint is detected the script will create one linear regression for the whole dataset.

The measured BOD<sub>3</sub> and  $k$  were both normalized by dry weight to account for differences in sediment amounts between flasks. For the BOD<sub>3</sub> the dry weight was obtained directly from the experiment flasks by discarding excess water and drying the remaining sediment for 48h at 120°C. The dry weight of the sediment was then calculated by weighing the bottles and subtracting the weight of the bottles, which had been measured before sediment addition. The average BOD<sub>3</sub>/g dry sediment, hereafter referred to as BOD<sub>3dry</sub>, for each site was calculated from the values of the corresponding triplicates. The sediment dry weight of the OECD 309 experiments could not be measured directly, but was instead calculated by multiplying the sediment wet weight for each flask with the average dry content of the site's sediment, obtained from the mass ratio of the wet and dry sediment measured during the BOD experiment (Equation S3 & S4). The  $k$  values could then be normalized by the dry weight of the corresponding replicate, yielding  $k_{dry}$ .

$$\text{Dry content} = \frac{\text{Average sediment dry weight}}{\text{Average sediment wet weight}}$$

**Equation S3.** Formula for calculating the sediment dry content for each site.

$$\text{Dry weight} = \text{Wet weight} * \text{Dry content}$$

**Equation S4.** Formula for calculating sediment dry weight in biodegradation incubation flasks.

### S1.4.3 Data processing for abiotic controls

For sites with abiotic controls, an abiotic-corrected version of  $k$  was produced. As abiotic processes had previously been shown to have little influence on the attenuation of the 47 selected compounds, the corrected and uncorrected data was expected to be similar. The correction was done by subtracting the natural logarithm of the relative peak area of the abiotic control from that of the replicate for each timepoint (Equation S5).

$$\text{Area, transformed and corrected} = \ln \frac{A_{\text{sample}}}{A_{\text{to sample}}} - \ln \frac{A_{\text{control}}}{A_{\text{to control}}}$$

**Equation S5.** Formula for calculating sorption corrected ln-transformed relative peak area for a given timepoint.

As a second step, a correction for the dissolved fraction was performed. The purpose of this was to control for the buffering effect of sorption on the bioavailable concentration, which could cause an underestimation of  $k$  due to desorption as the dissolved fraction of the compound is degraded during the experiment. The dissolved fraction,  $df$ , of a compound was calculated by dividing the area of the abiotic control at  $t_0$  with that of the hydrolysis control at  $t_0$ . For site F2 no hydrolysis control was available, and so the  $df$  of each compound was simulated based on the average  $df$  of that compound for the other sites. This was deemed appropriate as  $df$  generally varied little between sites (RSD < 25% for all compounds). The rate constants were then divided by their dissolved fraction before being divided by the sample dry weight (same as the non-abiotic corrected rate constants) to produce abiotic corrected dry weight normalized biodegradation rate constants  $k_{dryS}$ .

#### S1.4.4 Statistical testing

An analysis of variance (ANOVA) test was applied to test if the  $BOD_{3dry}$  differed between sites. Before the ANOVA test was applied, the normality and homogeneity of variances were tested with a Shapiro-Wilk test and Levene's test respectively. The pre-tests revealed that neither assumption was violated at a 0.05 significance level, and as such the ANOVA was performed. The result of the ANOVA test revealed that there were significant differences at a 0.05 significance level. Subsequently, a Tukey post-hoc test was applied to test which sites differed from each other regarding  $BOD_{3dry}$ .

A set of quality criteria was applied to the measured  $k_{dry}$ , which were only considered valid if they were based on a minimum of 5 timepoints and significantly different from 0,  $p < 0.05$ . The relationship between  $BOD_{3dry}$  and  $k_{dry}$  was assessed for all compounds which had 5 valid  $k_{dry}$  at a minimum of 3 sites using linear least squares regression. A positive or negative relationship between  $BOD_{3dry}$  and  $k_{dry}$  was considered significant if the p-value of the regression was smaller than 0.05. The same criteria and approach were applied to comparisons of  $BOD_{3dry}$  and  $k_{dryS}$ .

A paired t-test was used to assess if the standard deviation in  $k_{dry}$  decreased significantly after normalization by  $BOD_{3dry}$ . Before the test was employed, the assumption of normally distributed differences was tested using a Shapiro test, which indicated the assumption of normality could not be rejected ( $p = 0.8279$ ). The effect size of the difference was subsequently tested using a paired sample Cohen's d test.

## S2. Supporting information on study results

### S2.1 Rate constants

**Table S5.** Dry weight-normalized attenuation rate constants,  $k_{dry}$ . The  $k_{dry}$  for each compound and site produced by the modified OECD 309 biodegradation test is shown blue. For sites with abiotic controls abiotic corrected rate constants,  $k_{dryS}$ , are also available in red. The three rows within each cell represent the observed  $k_{dry}/k_{dryS}$  for the three replicates of each site.

| Compound                  | F1                      |                | F2                      |                         | F3                      | F4                      | F5                      | F6        | F7        | F8        |                         | F9                      |                | F10                     |                         |
|---------------------------|-------------------------|----------------|-------------------------|-------------------------|-------------------------|-------------------------|-------------------------|-----------|-----------|-----------|-------------------------|-------------------------|----------------|-------------------------|-------------------------|
|                           | $k_{dry}$               | $k_{dryS}$     | $k_{dry}$               | $k_{dryS}$              | $k_{dry}$               | $k_{dry}$               | $k_{dry}$               | $k_{dry}$ | $k_{dry}$ | $k_{dry}$ | $k_{dryS}$              | $k_{dry}$               | $k_{dryS}$     | $k_{dry}$               | $k_{dryS}$              |
| 4-(4-Nitrobenzyl)pyridine | 0.022<br>0.019          | -0.065         | 0.026<br>0.022<br>0.018 |                         |                         |                         |                         |           |           |           |                         | 0.016                   |                |                         |                         |
| Acesulfame                | 0.002<br>0.001<br>0.002 | 0.002<br>0.001 | 0.002<br>0.002<br>0.002 | 0.002<br>0.001<br>0.001 |                         | -0.004                  |                         |           |           |           |                         |                         |                |                         | -0.001<br>-0.001        |
| Anastrozole               | 0.012<br>0.010<br>0.010 |                | 0.004<br>0.003<br>0.003 |                         | 0.016<br>0.011<br>0.011 | 0.019<br>0.002<br>0.033 | 0.003<br>0.002<br>0.002 |           |           |           |                         | 0.003<br>0.005          | 0.004          | 0.011<br>0.007<br>0.009 | 0.015<br>0.010<br>0.012 |
| Atrazine                  |                         |                | 0.002<br>0.001          |                         |                         |                         |                         |           |           |           |                         | 0.002<br>0.002          | 0.022<br>0.017 |                         |                         |
| Bezafibrate               | 0.001<br>0.001          |                |                         |                         |                         |                         |                         | 0.011     |           |           | 0.028<br>0.041<br>0.043 | 0.032<br>0.044<br>0.046 |                | 0.014<br>0.015<br>0.012 | 0.018                   |
| Bromoxynil                | 0.018                   |                |                         |                         |                         |                         |                         |           | -0.012    |           |                         |                         |                |                         |                         |
| Caffeine                  |                         |                | 0.022<br>0.016<br>0.015 | 0.022<br>0.002<br>0.017 |                         |                         | 0.005<br>0.005          |           |           |           |                         |                         |                |                         | 0.105<br>0.133<br>0.149 |
| Candesartan               |                         |                | 0.001<br>0.001          |                         |                         | 0.007                   |                         |           |           |           | 0.002                   |                         |                |                         |                         |

|                     |                         |                |                         |       |                         |                |                         |                         |       |                         |                         |                         |  |                         |                         |                         |
|---------------------|-------------------------|----------------|-------------------------|-------|-------------------------|----------------|-------------------------|-------------------------|-------|-------------------------|-------------------------|-------------------------|--|-------------------------|-------------------------|-------------------------|
|                     |                         |                |                         |       |                         | 0.008          |                         |                         |       |                         |                         |                         |  | 0.005                   |                         |                         |
| Carbamazepine       | 0.003<br>0.002          |                | 0.002                   |       | 0.005<br>0.005<br>0.003 | 0.007<br>0.007 |                         | 0.006                   |       |                         |                         | 0.001<br>0.002<br>0.002 |  | 0.004<br>0.002          | 0.007                   |                         |
| Chlortoluron        | 0.005                   |                | 0.004<br>0.003          |       | 0.005                   | 0.012<br>0.011 | 0.002                   |                         |       |                         |                         | 0.004<br>0.005          |  | 0.008<br>0.007<br>0.006 | 0.010<br>0.009<br>0.008 |                         |
| Clofibric acid      |                         |                | 0.001<br>0.001          |       |                         |                |                         | 0.004                   |       | 0.001                   |                         |                         |  | 0.001<br>0.004<br>0.001 |                         |                         |
| Diclofenac          | 0.011                   |                |                         |       |                         |                |                         | 0.010                   |       |                         |                         |                         |  |                         |                         |                         |
| Dimethenamid        |                         |                | 0.003                   |       |                         | 0.007<br>0.009 | 0.001                   |                         |       |                         |                         |                         |  | 0.004<br>0.004          |                         |                         |
| Diuron              | 0.012<br>0.006          |                | 0.005<br>0.004          |       |                         |                |                         | 0.011                   |       |                         |                         |                         |  | 0.012<br>0.011<br>0.012 | 0.034<br>0.032<br>0.033 |                         |
| Ethylhexylglycerine |                         |                |                         |       | 0.025                   |                |                         | 0.075<br>0.060<br>0.063 |       | 0.119<br>0.103<br>0.042 | 0.084<br>0.130<br>0.119 |                         |  |                         | 0.058                   |                         |
| Fenhexamid          |                         |                |                         |       |                         | 0.09           |                         |                         | 0.178 |                         |                         |                         |  |                         | 0.014                   |                         |
| Flecainide*         | 0.016<br>0.021<br>0.017 | 0.023          | 0.005<br>0.005<br>0.004 |       |                         | 0.021<br>0.020 | 0.007<br>0.006<br>0.006 |                         |       |                         | 0.007                   | 0.009                   |  |                         | 0.012                   | 0.025<br>0.027<br>0.031 |
| Fluconazole*        | 0.002<br>0.001          | 0.002<br>0.001 | 0.001<br>0.001          | 0.001 | 0.006<br>0.004          | 0.007<br>0.010 |                         | 0.009                   |       |                         |                         |                         |  | 0.003<br>0.003          | 0.004<br>0.003<br>0.004 |                         |

|                   |                         |       |                         |                         |                         |                |                         |                         |                |                         |                         |                         |                                   |                         |
|-------------------|-------------------------|-------|-------------------------|-------------------------|-------------------------|----------------|-------------------------|-------------------------|----------------|-------------------------|-------------------------|-------------------------|-----------------------------------|-------------------------|
| flufenacet        |                         |       | 0.006                   |                         |                         |                |                         |                         |                |                         |                         |                         |                                   |                         |
| Furosemide        | 0.007<br>0.004<br>0.004 | 0.004 | 0.005<br>0.005<br>0.003 | 0.004<br>0.004<br>0.002 | 0.013<br>0.013<br>0.011 |                |                         | 0.009<br>0.009<br>0.012 |                |                         |                         | 0.004                   | 0.008<br>0.010<br>0.010           | 0.008                   |
| Gabapentin        |                         |       | 0.003<br>0.002<br>0.003 | 0.015<br>0.021          |                         |                | 0.001<br>0.000          |                         |                |                         |                         |                         |                                   | 0.014                   |
| Gemfibrozil       |                         |       | 0.002<br>0.001          |                         | 0.008<br>0.010          |                |                         |                         |                | 0.011<br>0.017<br>0.023 | 0.010<br>0.016<br>0.022 |                         | 0.016<br>0.008                    |                         |
| Hydroxy bupropion | 0.002<br>0.002          |       | 0.003<br>0.003<br>0.003 |                         | 0.006<br>0.004          | 0.005<br>0.006 | 0.001<br>0.001<br>0.001 |                         |                |                         |                         | 0.002                   | -0.002<br>0.004<br>0.003<br>0.004 | 0.009<br>0.007<br>0.010 |
| Iprovalicarb      |                         |       | 0.004<br>0.002          | 0.003<br>0.003          | 0.007<br>0.007<br>0.004 | 0.006<br>0.007 | 0.001<br>0.002          |                         |                |                         |                         | 0.003                   | 0.014                             | 0.025<br>0.028          |
| Isoproturon       | 0.003                   |       | 0.003<br>0.003<br>0.002 |                         | 0.002<br>0.008<br>0.007 |                |                         | 0.005<br>0.007          |                |                         |                         | 0.002                   | 0.003                             | 0.005<br>0.004<br>0.004 |
| Ketoprofen        | 0.003<br>0.002          |       | 0.005<br>0.003<br>0.003 | 0.004<br>0.003<br>0.003 | 0.009<br>0.009<br>0.008 |                | 0.002<br>0.002<br>0.003 |                         | 0.002<br>0.006 | 0.007<br>0.010<br>0.007 | 0.009<br>0.012<br>0.009 | 0.002<br>0.002<br>0.003 | 0.014<br>0.016<br>0.009           | 0.015<br>0.017<br>0.010 |
| MCPA              | 0.002                   | 0.002 | 0.002<br>0.001<br>0.001 | 0.001<br>0.001          | 0.003<br>0.002          | 0.005<br>0.005 |                         |                         |                | 0.000                   | 0.003<br>0.004<br>0.004 |                         | 0.004<br>0.003<br>0.002           | 0.005<br>0.005<br>0.004 |
| Mecoprop          |                         | 0.001 | 0.001<br>0.001          |                         |                         |                |                         |                         |                | 0.001                   |                         |                         | 0.002<br>0.002                    | 0.003<br>0.003<br>0.002 |
| Mefenamic acid    |                         |       | 0.005                   |                         |                         |                |                         |                         |                |                         |                         |                         |                                   |                         |
| Metformin         |                         |       | 0.005                   | 0.005                   | 0.009                   | 0.007          |                         | 0.006                   |                |                         |                         |                         |                                   |                         |

|                        |                         |  |                         |                         |                         |                         |                         |                         |                         |                         |                         |                         |                         |                         |                         |
|------------------------|-------------------------|--|-------------------------|-------------------------|-------------------------|-------------------------|-------------------------|-------------------------|-------------------------|-------------------------|-------------------------|-------------------------|-------------------------|-------------------------|-------------------------|
|                        |                         |  | 0.004<br>0.003          | 0.004<br>0.003          | 0.008                   | 0.007<br>0.007          |                         |                         |                         | 0.007                   |                         |                         |                         | -0.010<br>-0.005        | -0.011                  |
| Metolachlor            | 0.006                   |  | 0.004                   |                         |                         | 0.017                   |                         |                         |                         |                         |                         | 0.003                   |                         | 0.012                   |                         |
| Metoprolol             | 0.009<br>0.008<br>0.009 |  | 0.002<br>0.002<br>0.002 |                         | 0.011<br>0.007          | 0.013<br>0.015<br>0.046 | 0.003<br>0.003<br>0.003 | 0.012<br>0.010          |                         | 0.003<br>0.007          | 0.010                   | 0.003<br>0.004          |                         | 0.008                   | 0.019<br>0.025          |
| Metoxuron              | 0.004                   |  | 0.003<br>0.002          |                         | 0.006<br>0.004<br>0.004 | 0.012<br>0.013<br>0.016 |                         |                         |                         |                         |                         | 0.002<br>0.003<br>0.002 | 0.003<br>0.004<br>0.003 | 0.004<br>0.004<br>0.005 | 0.010<br>0.010<br>0.011 |
| Naproxen               |                         |  |                         |                         | 0.013                   |                         | 0.003                   | 0.007<br>0.011          |                         | 0.013                   | 0.011                   |                         |                         | 0.014<br>0.008<br>0.010 | 0.019<br>0.015<br>0.012 |
| p-Toluenesulfonic acid |                         |  | 0.016<br>0.015<br>0.014 | 0.017<br>0.016<br>0.016 | 0.016<br>0.010          |                         | 0.007                   |                         | 0.003<br>0.007<br>0.006 | 0.015<br>0.037<br>0.023 | 0.015<br>0.023          | 0.002                   |                         | 0.008<br>0.014<br>0.005 | 0.006<br>0.012          |
| Sulfadimethoxine       | 0.011<br>0.005<br>0.007 |  | 0.004<br>0.002          |                         | 0.032<br>0.031          | 0.042<br>0.050<br>0.043 | 0.002                   | 0.016<br>0.015<br>0.017 |                         | 0.006<br>0.010<br>0.008 | 0.007<br>0.011<br>0.009 |                         |                         | 0.017<br>0.017<br>0.012 | 0.014<br>0.014<br>0.010 |
| Sulfamethazine         | 0.022<br>0.013<br>0.013 |  | 0.005<br>0.004<br>0.003 |                         |                         | 0.177<br>0.180          | 0.004<br>0.002<br>0.003 |                         |                         | 0.012<br>0.018<br>0.013 | 0.010<br>0.017<br>0.011 |                         |                         | 0.185<br>0.182<br>0.160 | 0.172<br>0.168<br>0.146 |
| Sulfamethoxazole       |                         |  |                         |                         | 0.022<br>0.021<br>0.016 | 0.017<br>0.030<br>0.027 | 0.002                   |                         |                         | 0.008<br>0.012<br>0.007 | 0.008<br>0.012<br>0.008 |                         |                         | 0.011<br>0.013<br>0.008 | 0.008<br>0.011<br>0.006 |
| Tamsulosin             | 0.009                   |  |                         |                         |                         |                         |                         |                         |                         |                         | 0.014                   |                         |                         |                         | 0.031<br>0.021<br>0.019 |
| Terbutryn              |                         |  | 0.007<br>0.005          |                         |                         |                         |                         |                         |                         |                         |                         | 0.009                   |                         |                         | 0.008<br>0.003<br>0.002 |
| Valsartan              |                         |  | 0.006<br>0.003<br>0.004 | 0.006<br>0.003<br>0.004 | 0.009<br>0.005<br>0.006 |                         | 0.002                   |                         |                         | 0.008<br>0.012<br>0.010 | 0.006<br>0.010<br>0.008 |                         |                         | 0.011                   |                         |

|             |       |  |       |        |       |       |       |  |       |       |       |       |        |       |       |
|-------------|-------|--|-------|--------|-------|-------|-------|--|-------|-------|-------|-------|--------|-------|-------|
| Venlafaxine |       |  | 0.008 |        | 0.014 |       | 0.011 |  |       |       |       |       |        |       |       |
|             |       |  | 0.008 |        |       | 0.017 | 0.010 |  |       |       |       |       |        |       | 0.086 |
|             |       |  | 0.007 |        |       | 0.016 | 0.010 |  | 0.005 |       |       | 0.005 |        | 0.007 | 0.100 |
| Zolpidem    | 0.017 |  | 0.008 |        | 0.018 | 0.019 | 0.005 |  |       |       |       |       | -0.009 | 0.010 | 0.020 |
|             | 0.012 |  | 0.008 |        |       | 0.017 | 0.005 |  |       | 0.007 | 0.010 |       | -0.009 | 0.008 | 0.017 |
|             | 0.013 |  | 0.004 | -0.005 |       | 0.022 | 0.004 |  |       |       |       | 0.006 |        | 0.017 | 0.030 |

## S2.2 Relationship between respiration and attenuation

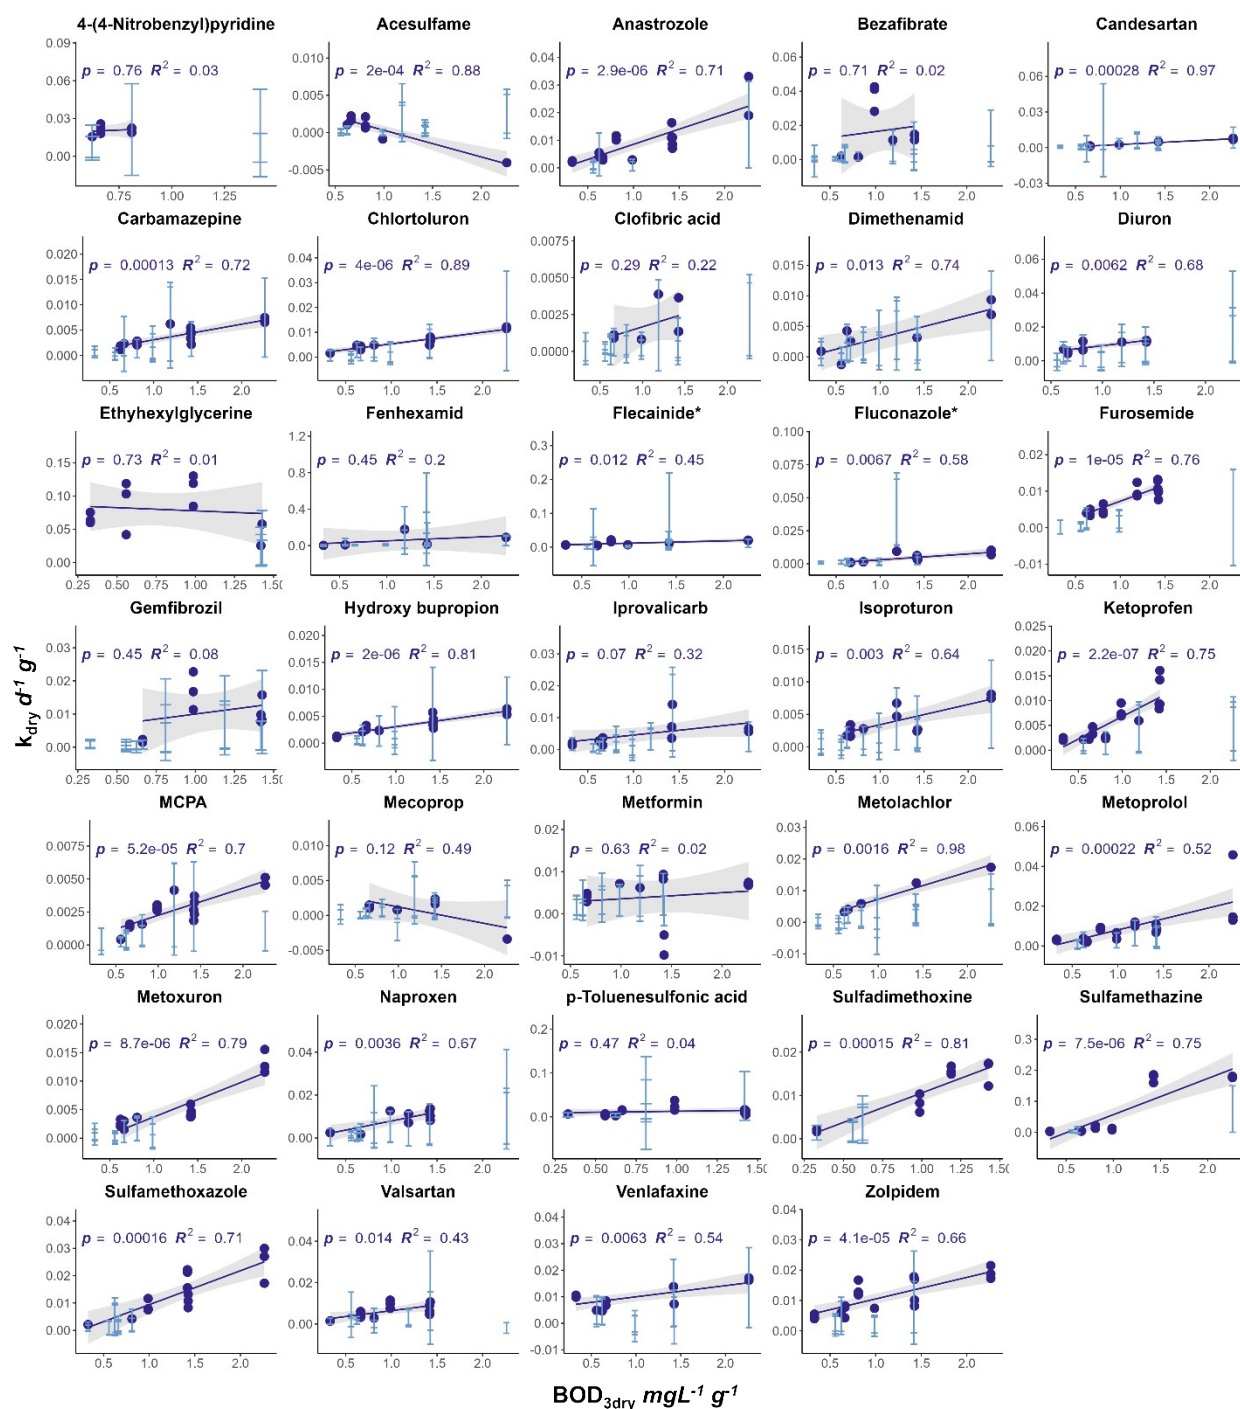

**Figure S2.** Relationship between  $BOD_{3dry}$  and  $k_{dry}$  for all datapoints. The figure displays the linear regression between  $BOD_{3dry}$  and  $k_{dry}$  as calculated from only the datapoints which passed data quality criteria (blue dots), the shaded areas represent the 95% confidence interval of each slope. Light blue bars represent the 95% confidence interval of datapoints which did not pass data quality criteria. Compounds marked with \* were subject to outlier removal (see Materials and Methods – Data processing).

## S2.3 Peak area timeseries

### a) F1 replicate A

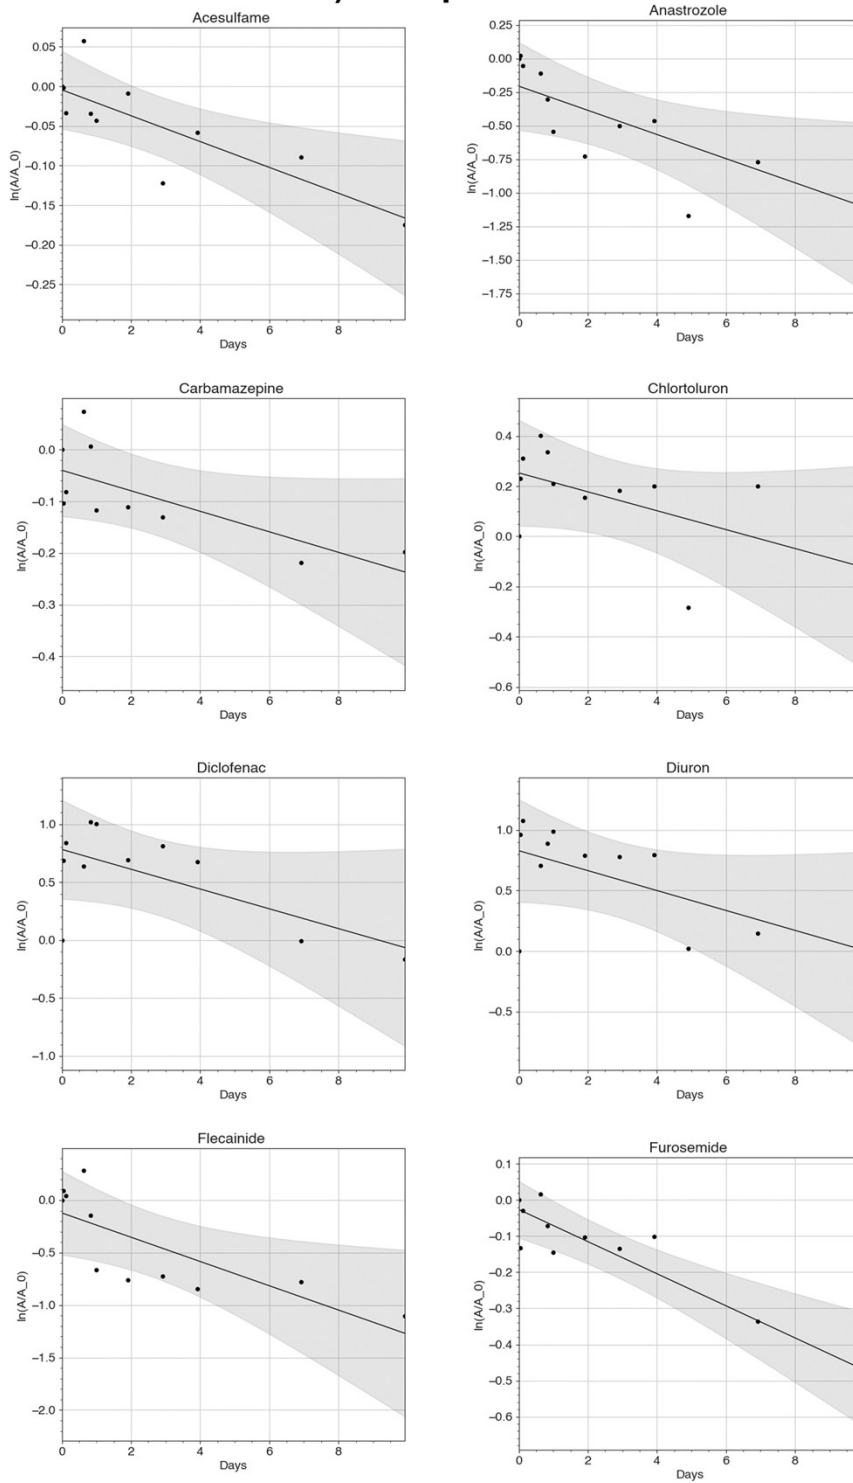

### a) F1 replicate A (continued)

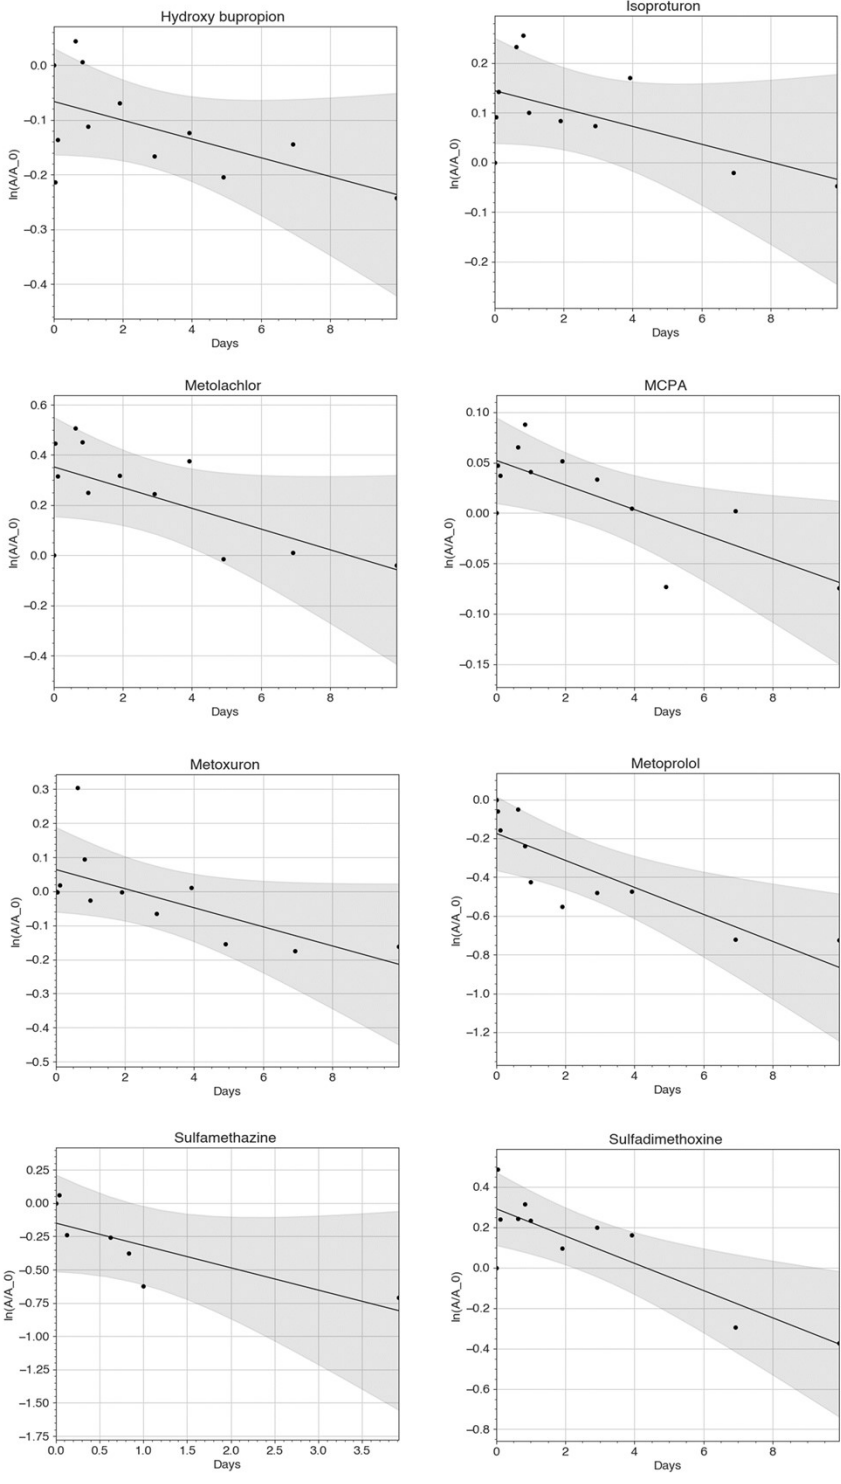

### a) F1 replicate A (continued)

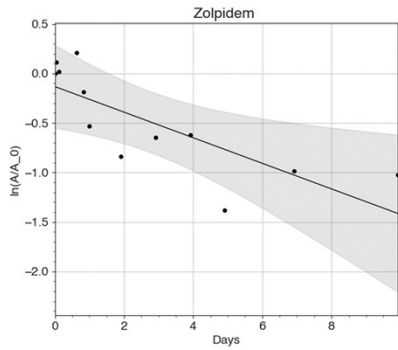

### b) F1 replicate B

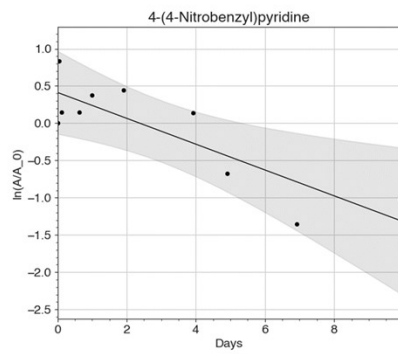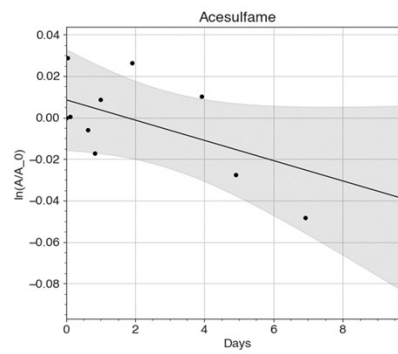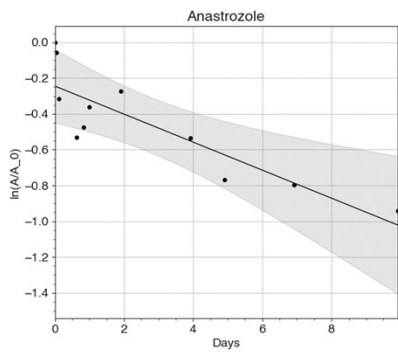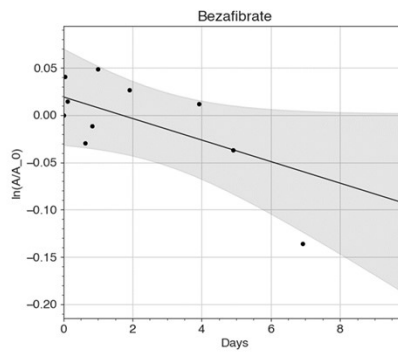

## b) F1 replicate B (continued)

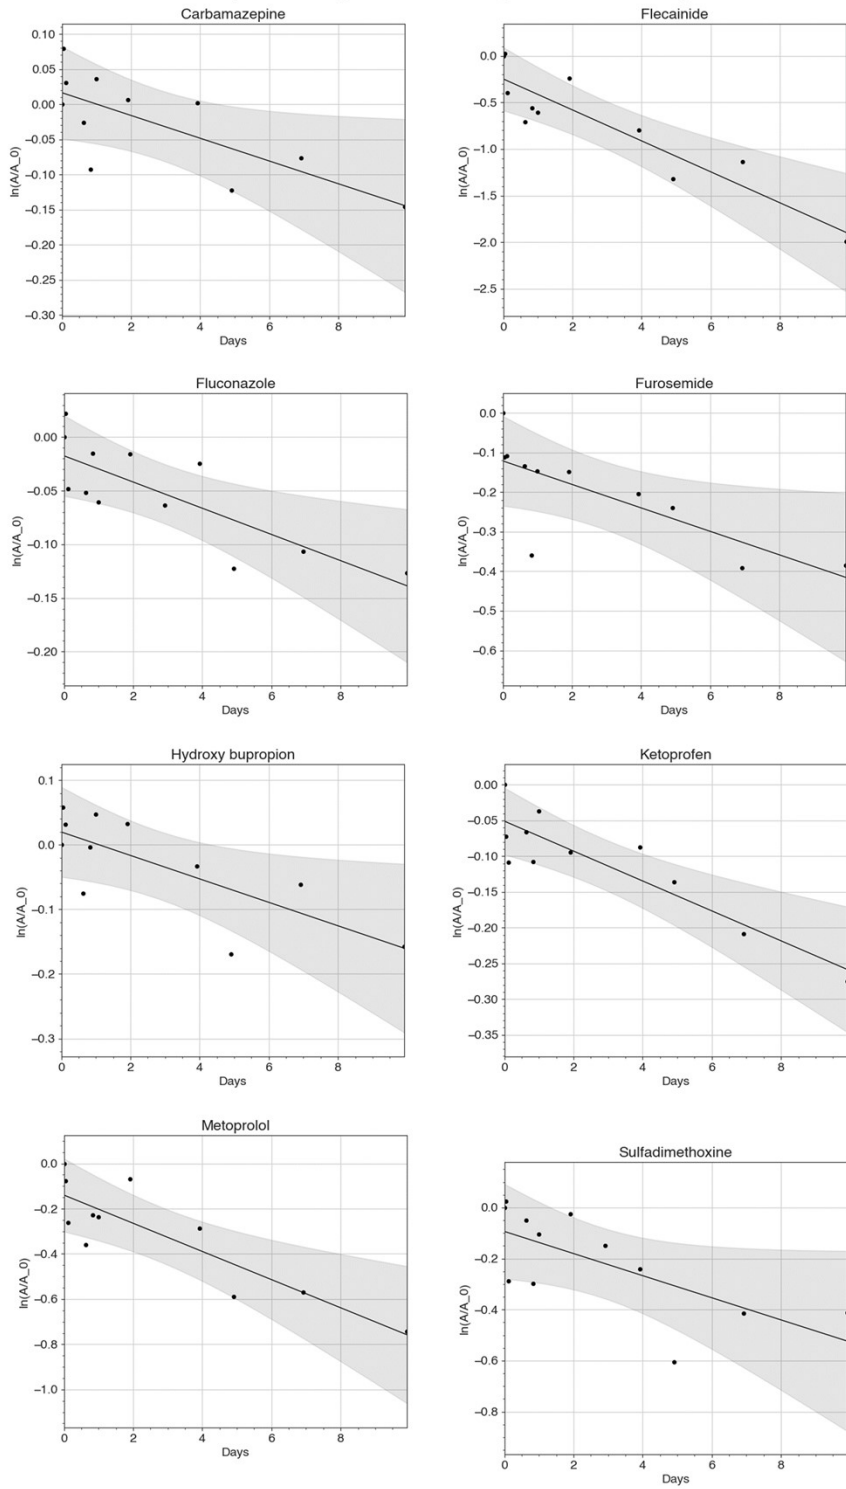

### b) F1 replicate B (continued)

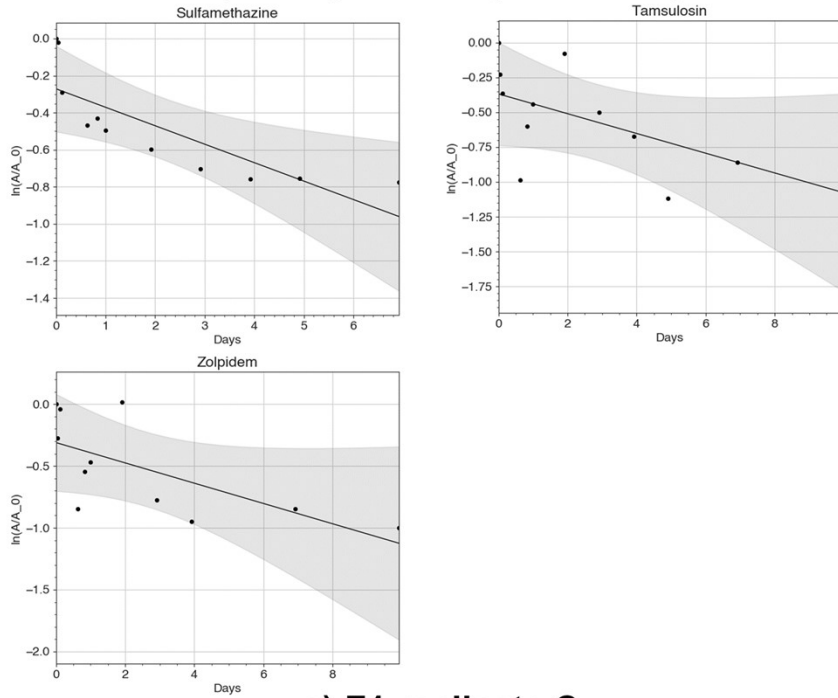

### c) F1 replicate C

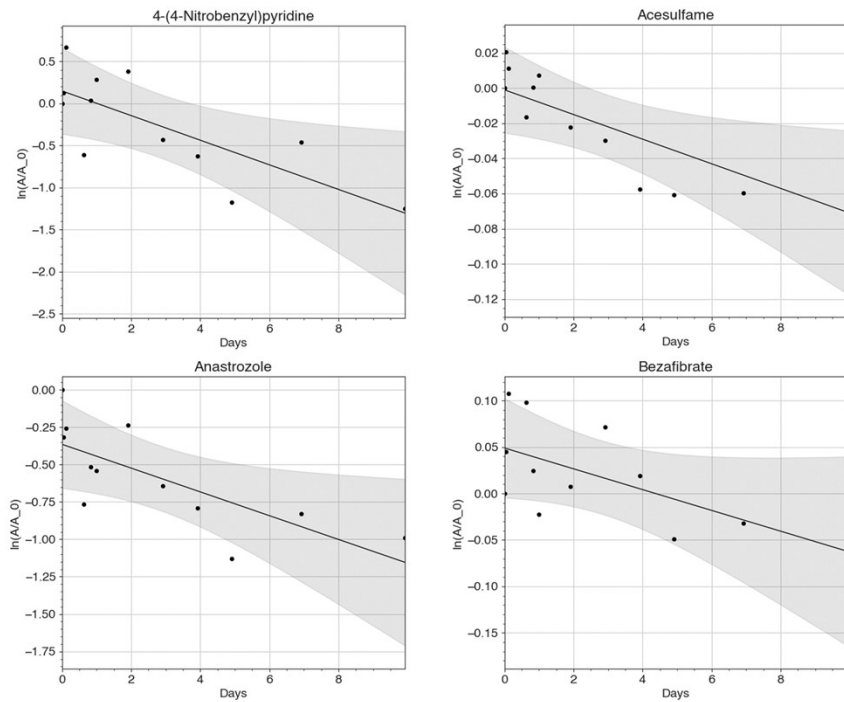

### c) F1 replicate C (continued)

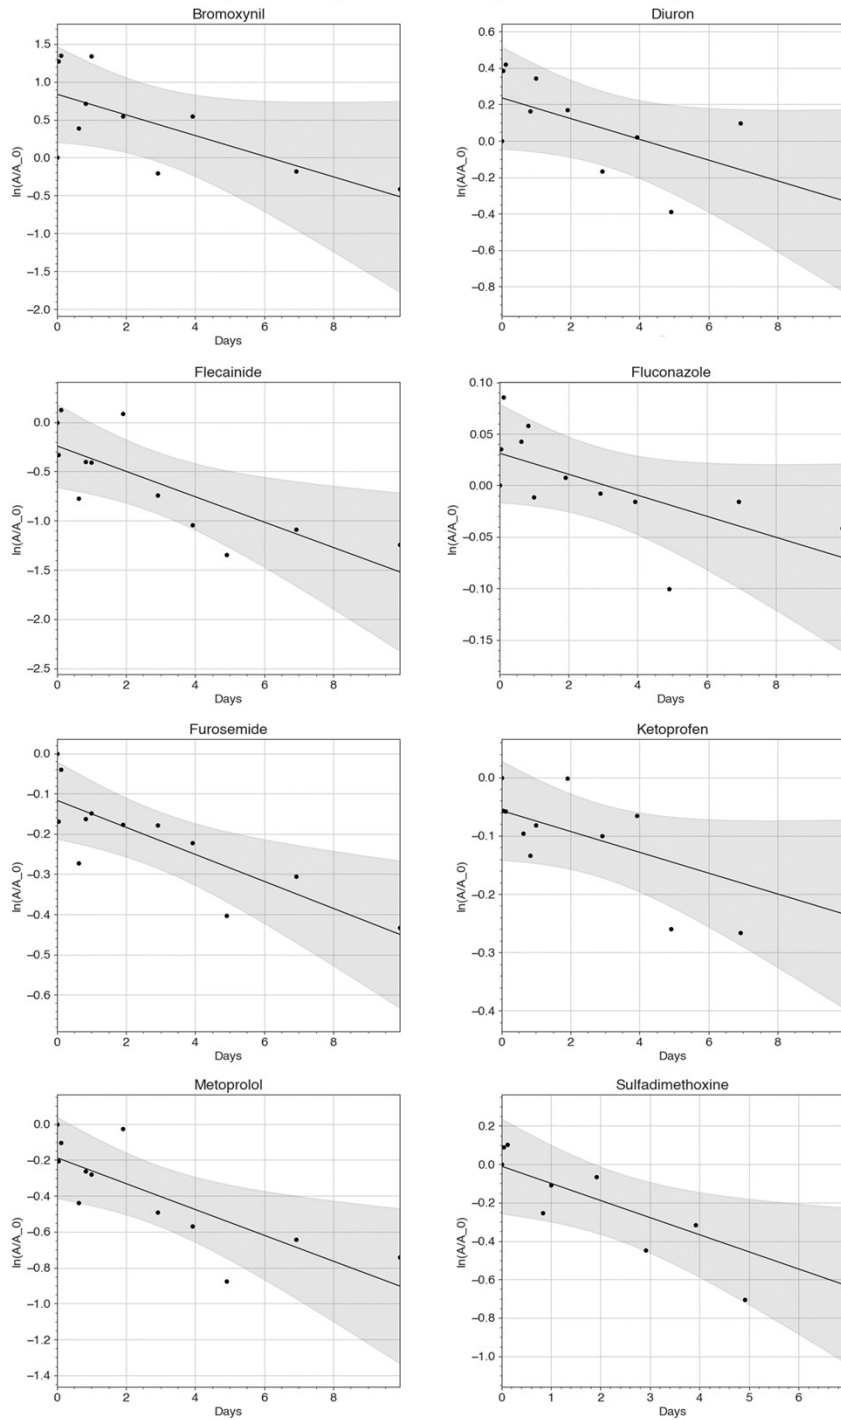

### c) F1 replicate C (continued)

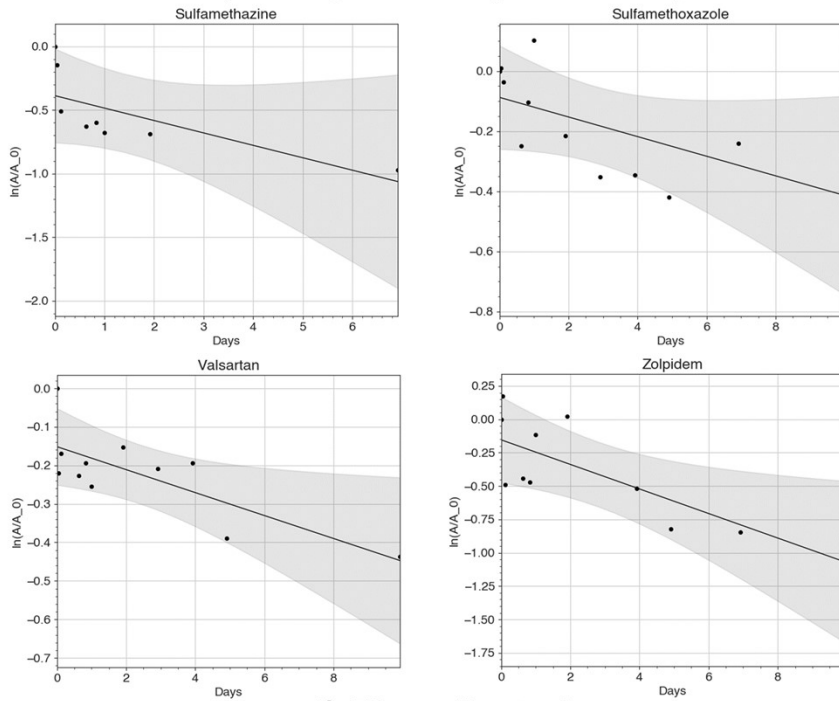

### d) F2 replicate A

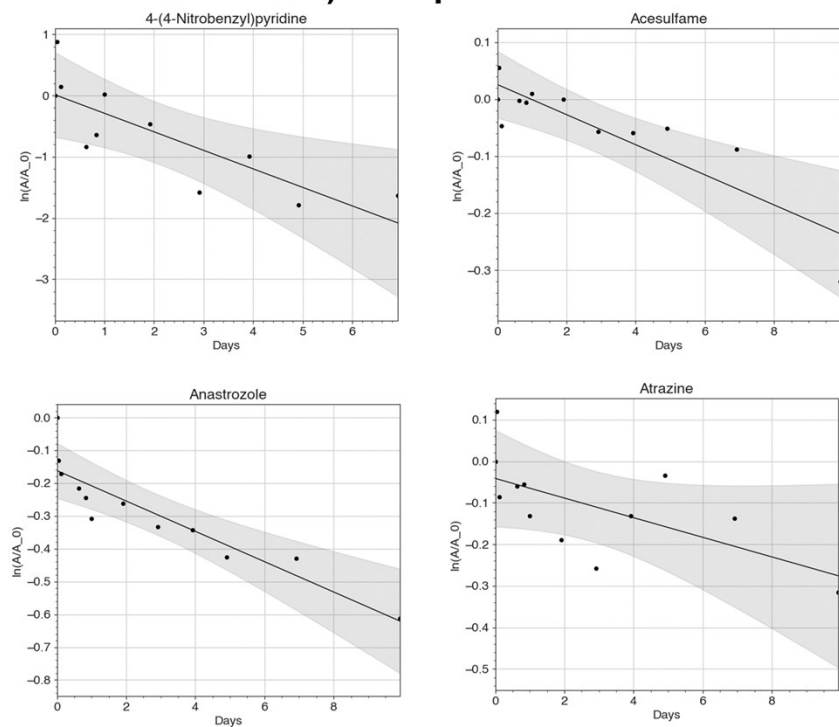

### d) F2 replicate A (continued)

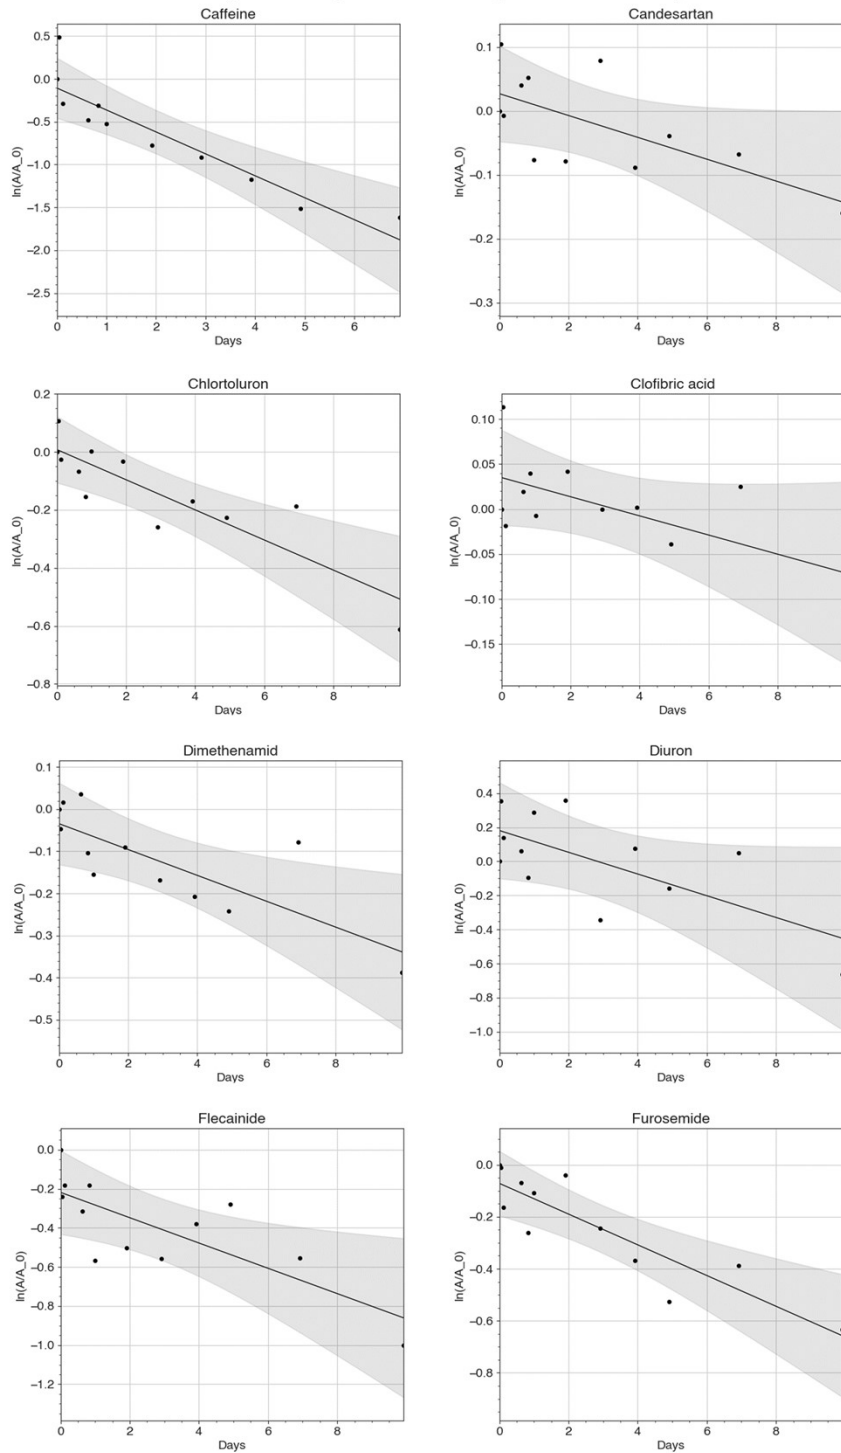

### d) F2 replicate A (continued)

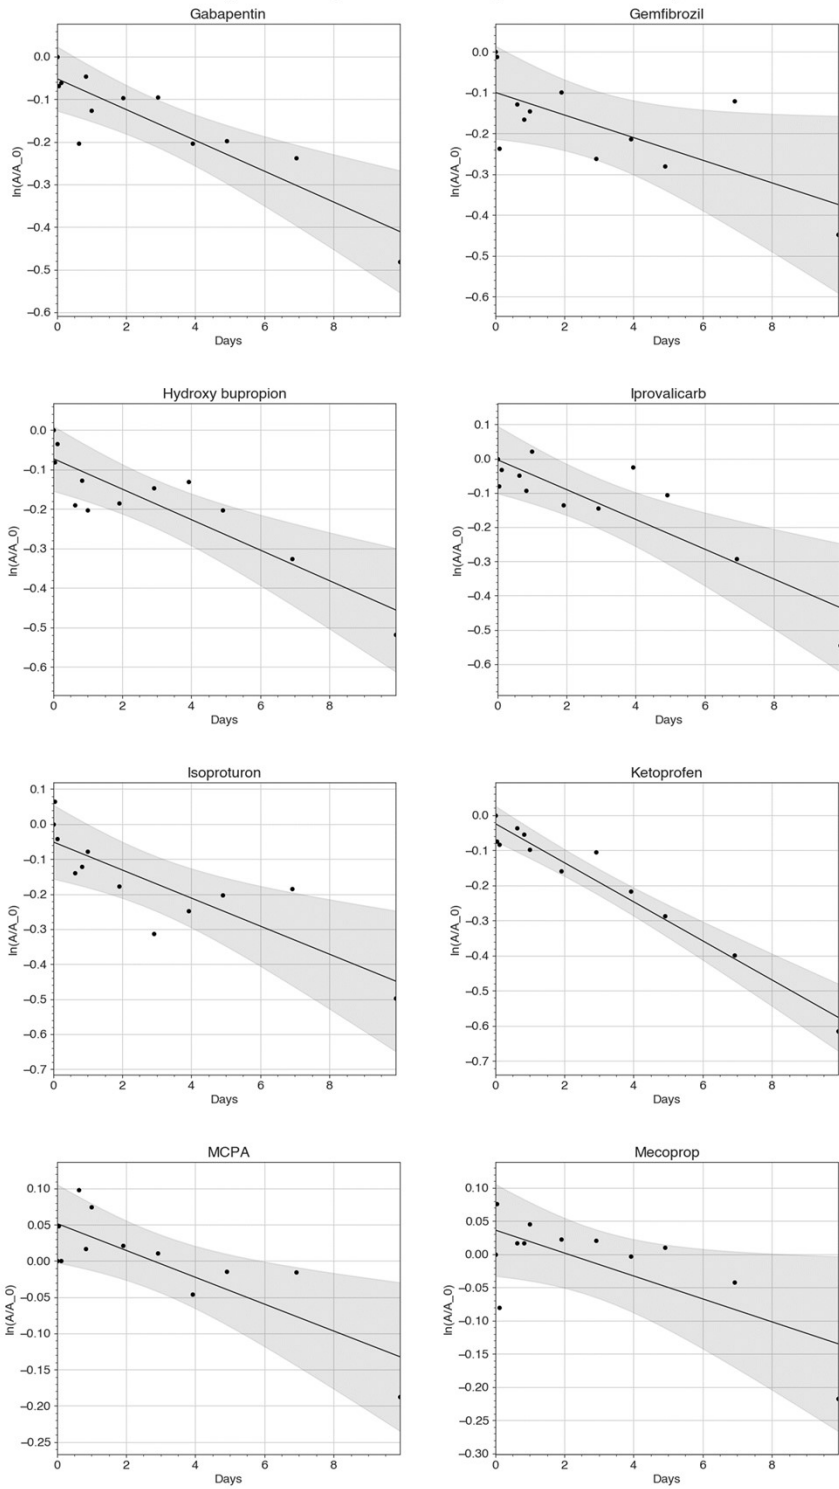

### d) F2 replicate A (continued)

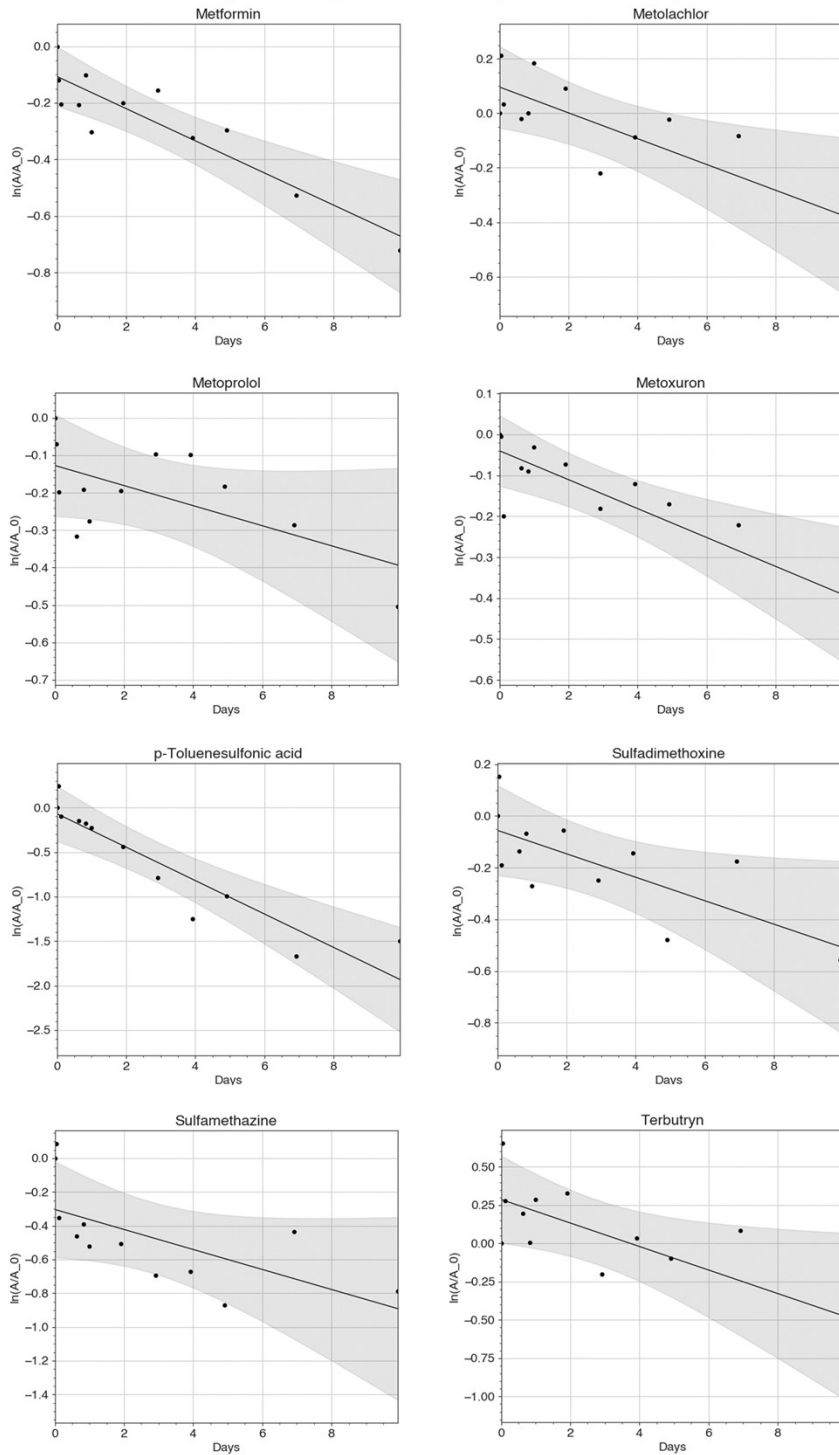

### d) F2 replicate A (continued)

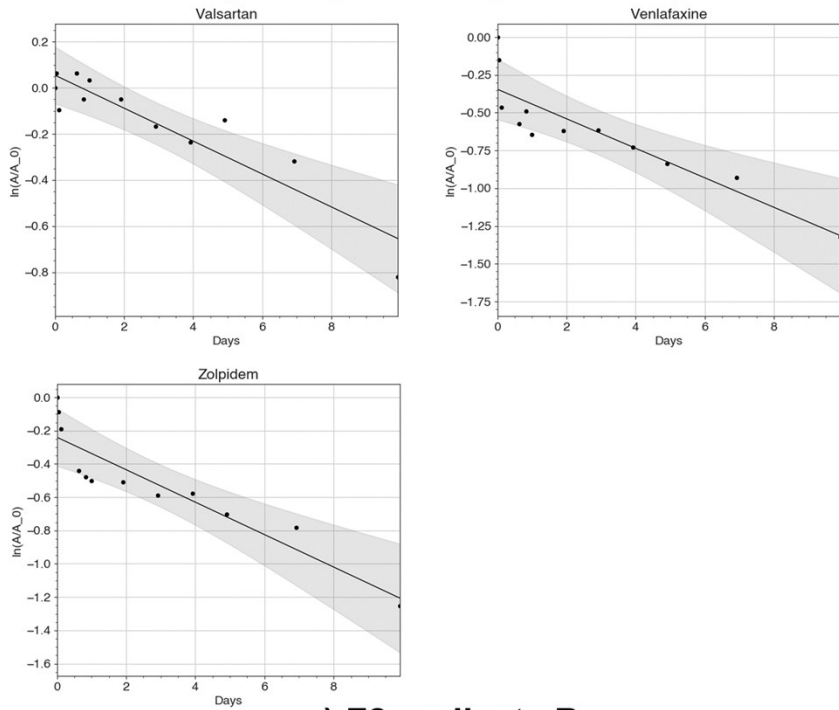

### e) F2 replicate B

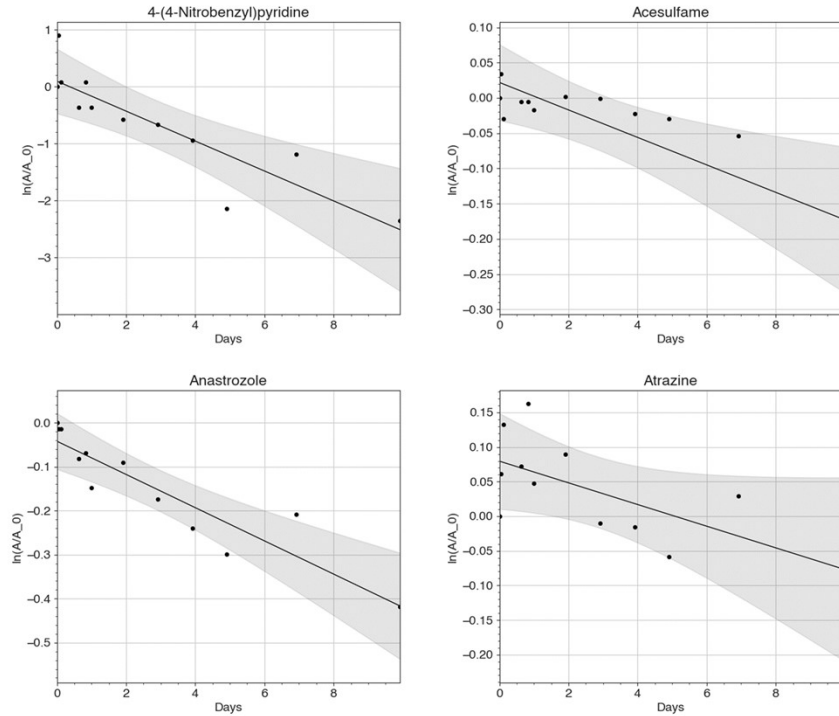

### e) F2 replicate B (continued)

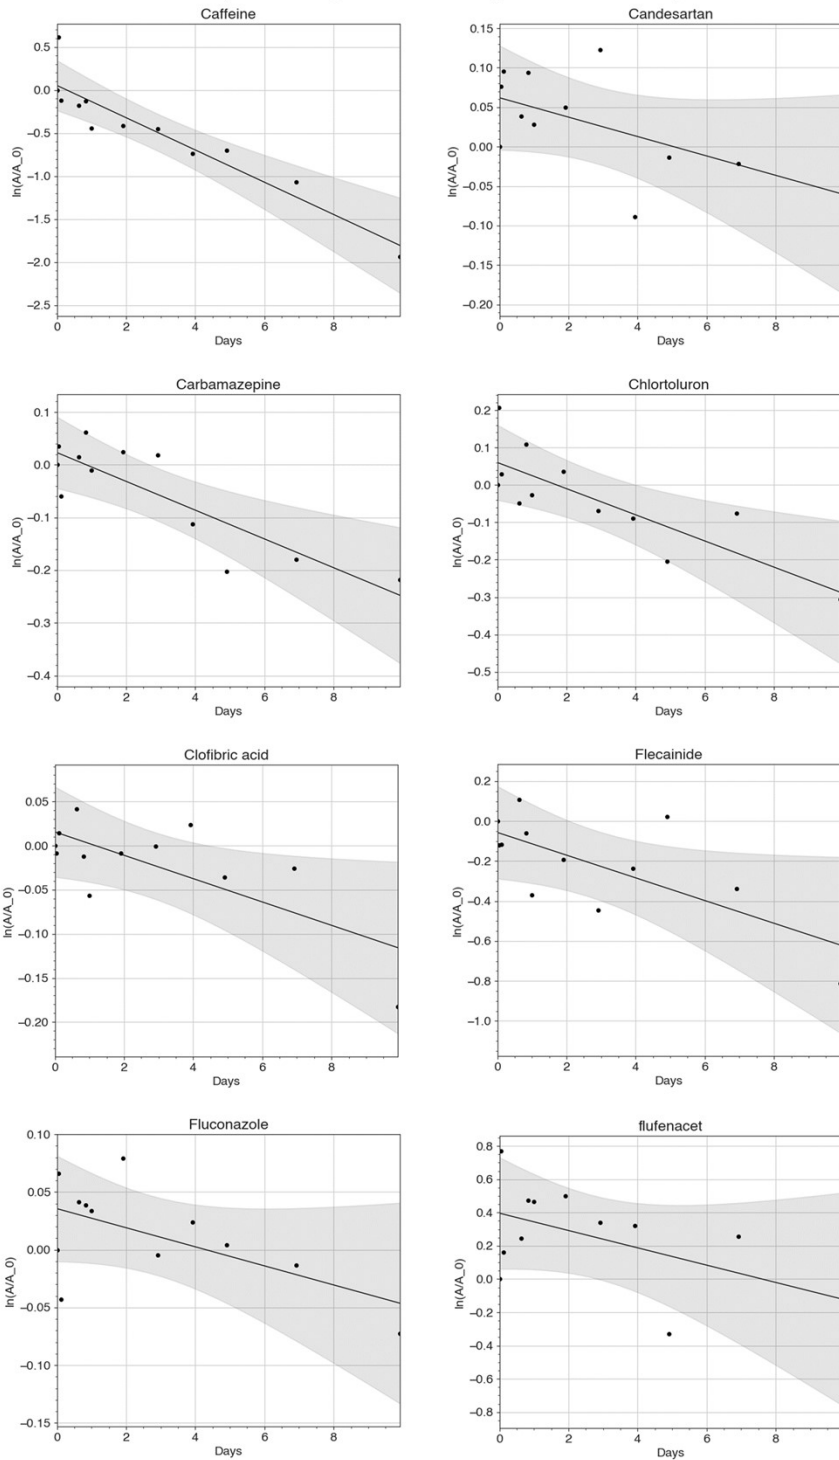

### e) F2 replicate B (continued)

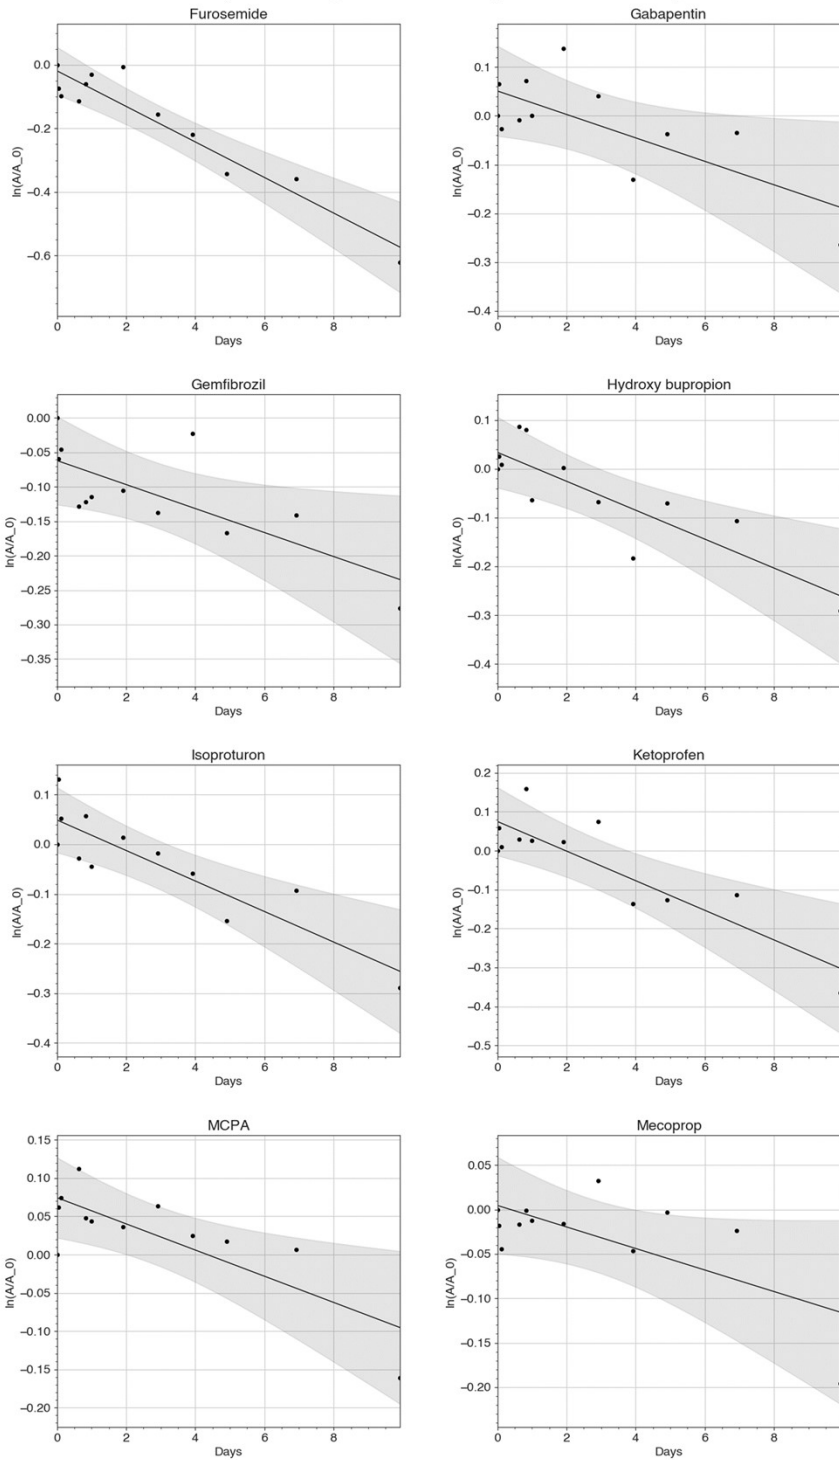

### e) F2 replicate B (continued)

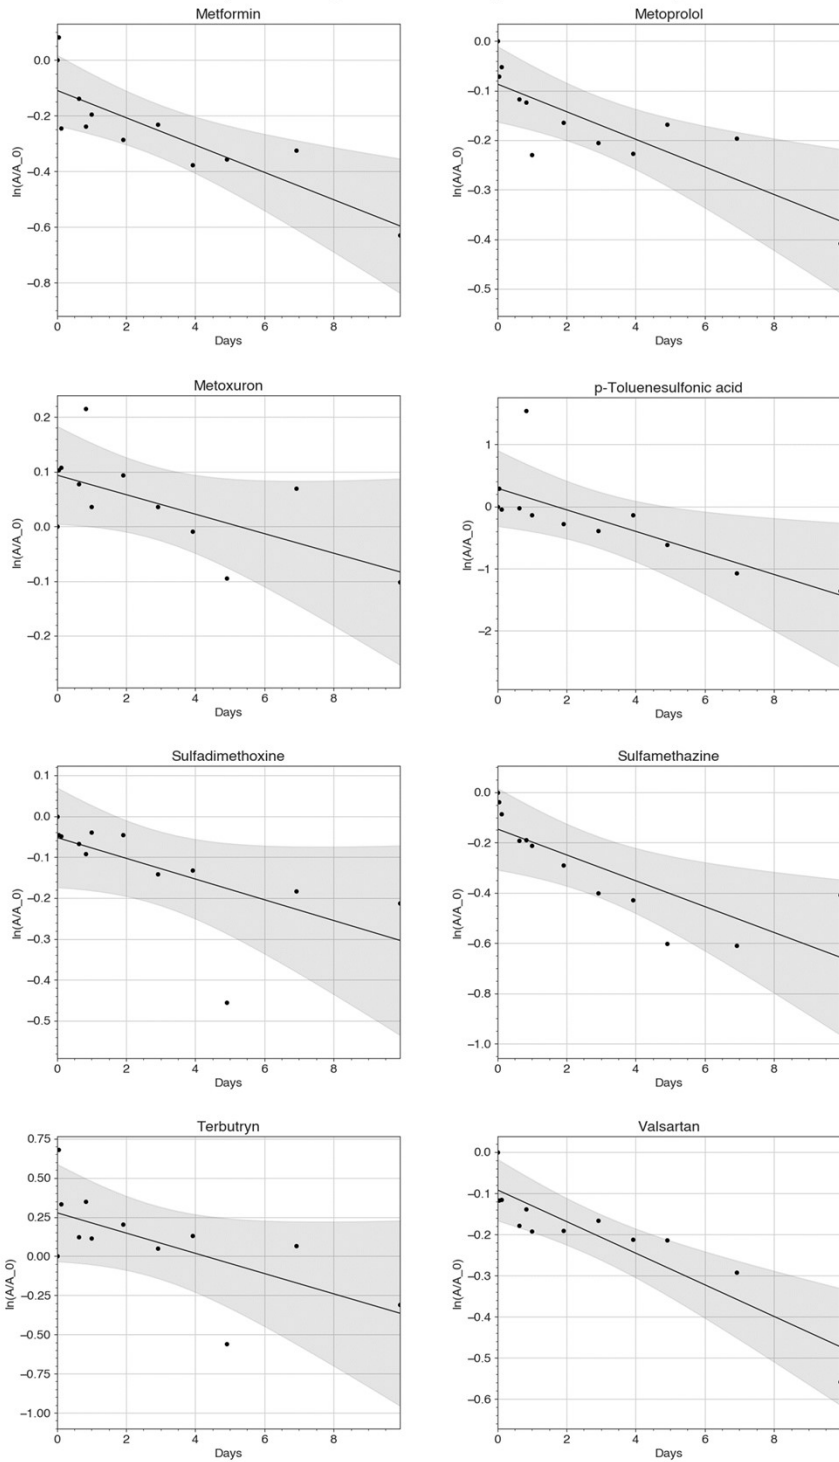

### e) F2 replicate B (continued)

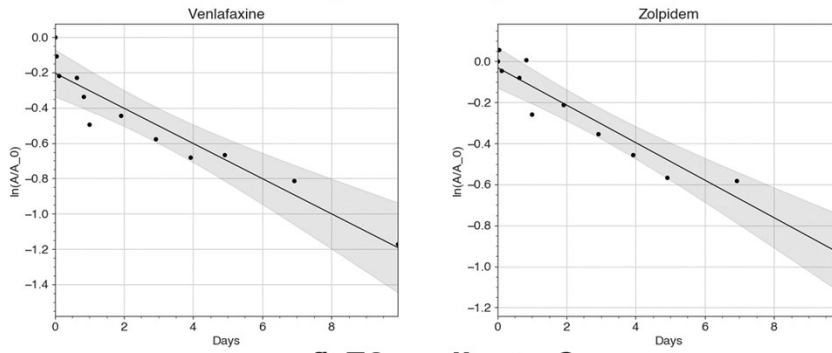

### f) F2 replicate C

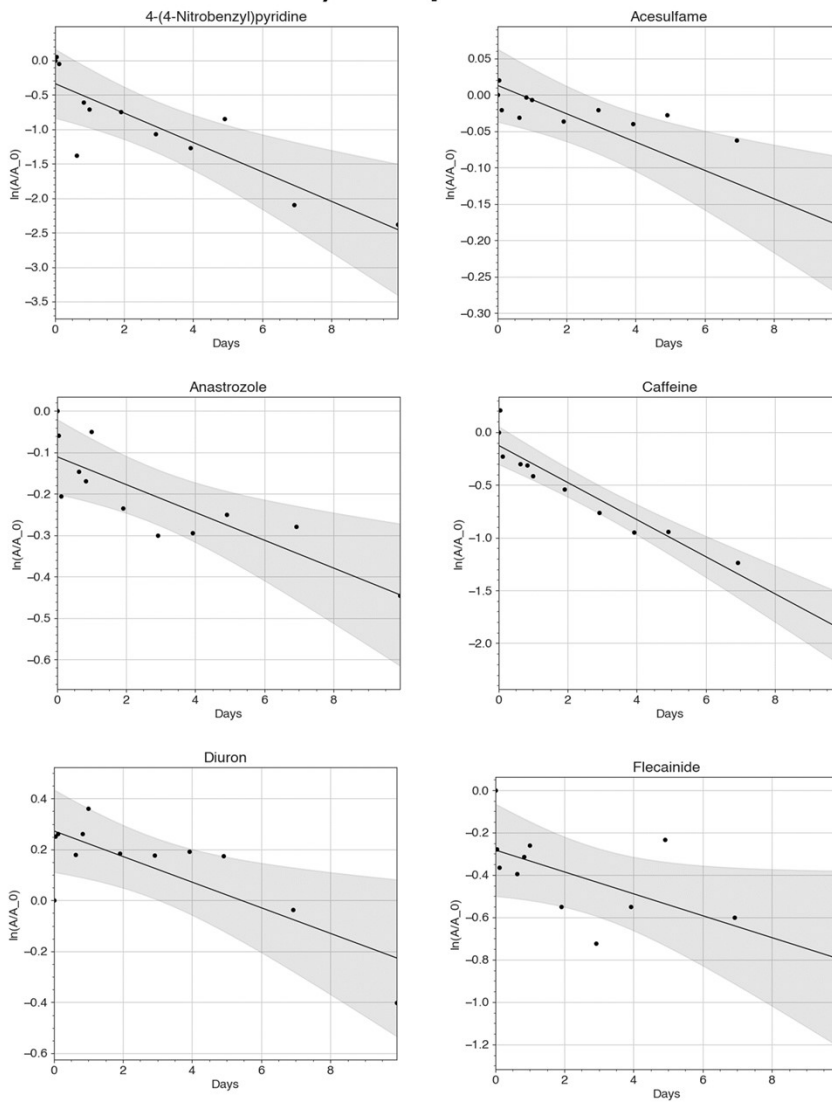

### f) F2 replicate C (continued)

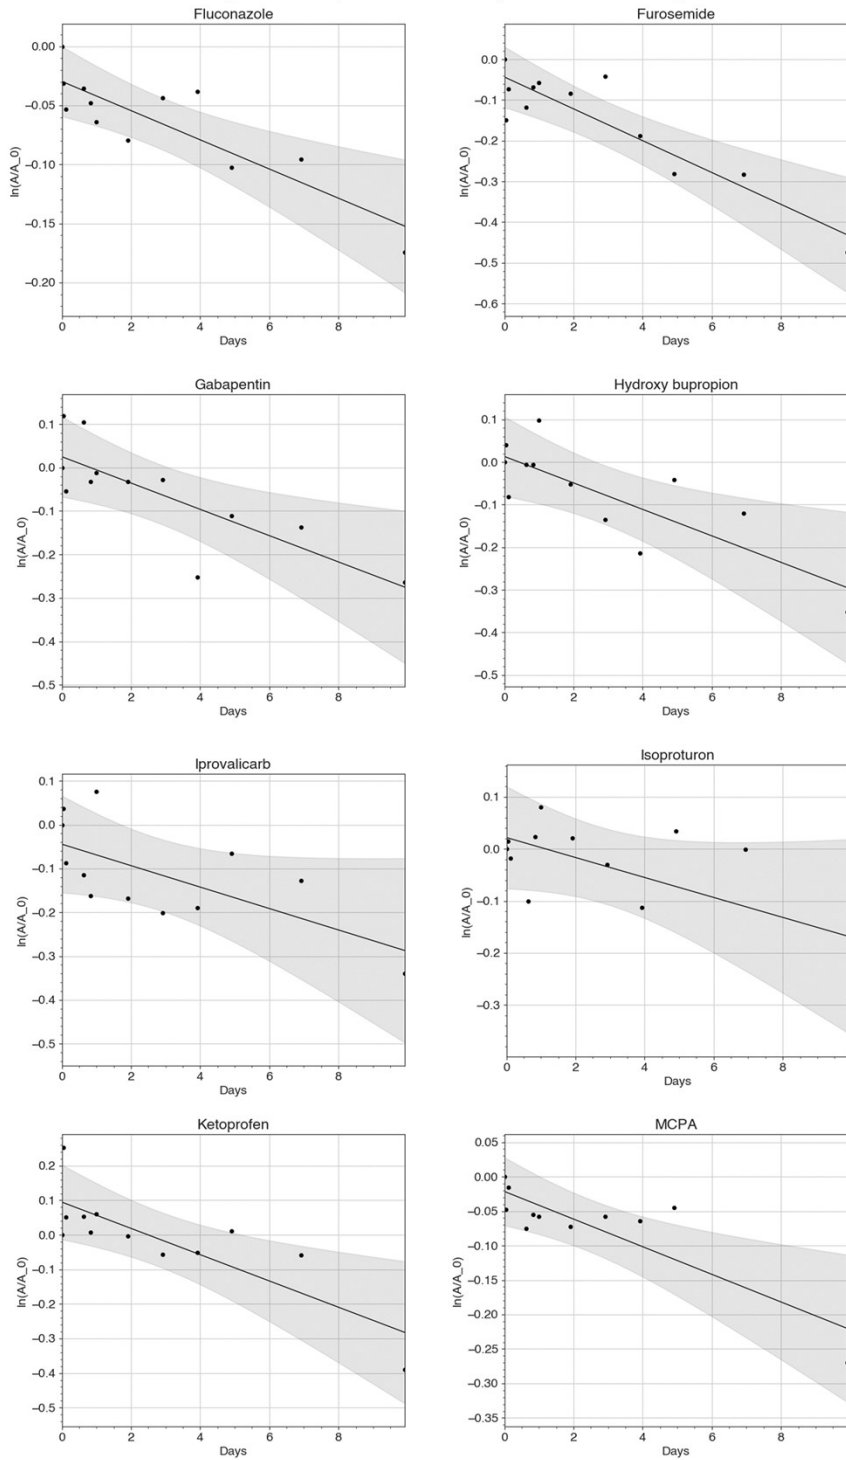

### f) F2 replicate C (continued)

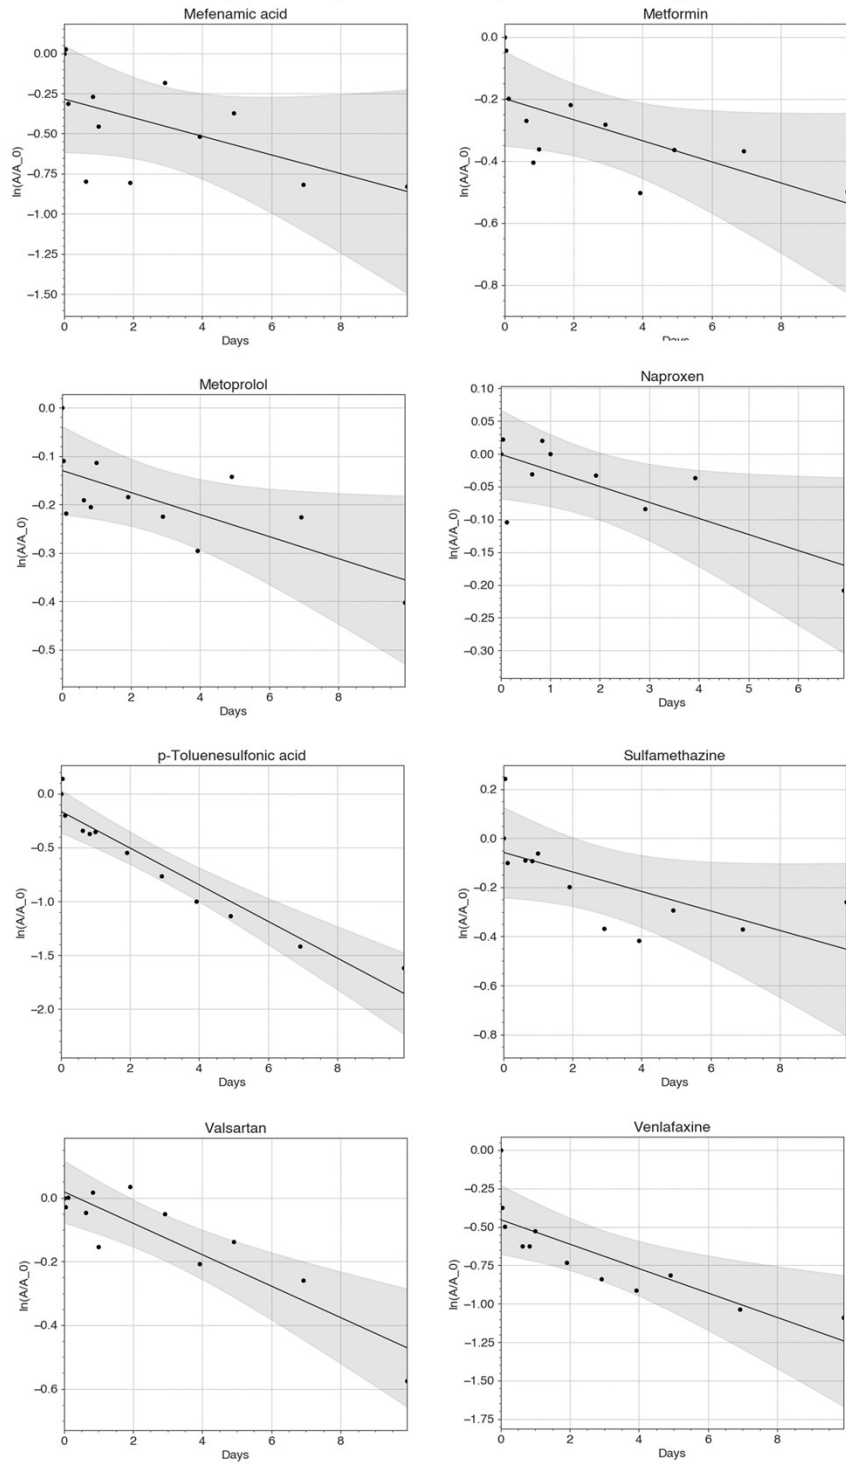

### f) F2 replicate C (continued)

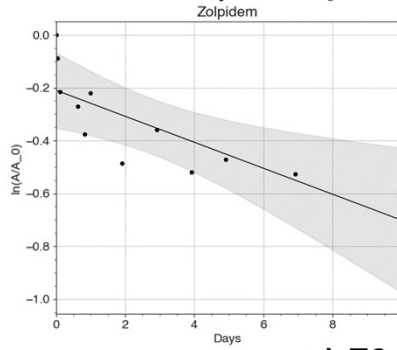

### g) F3 replicate A

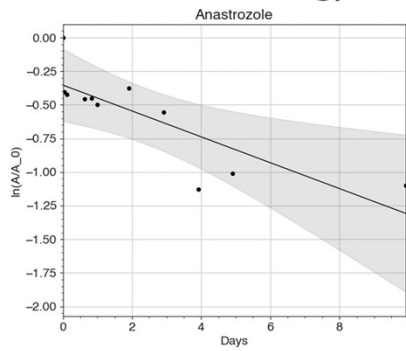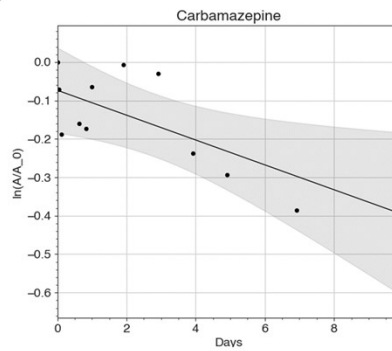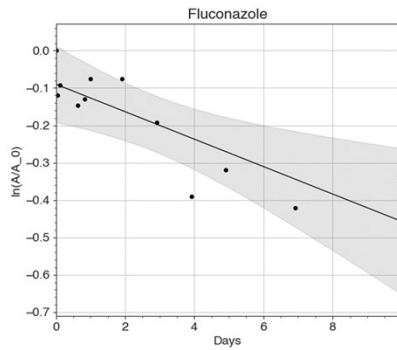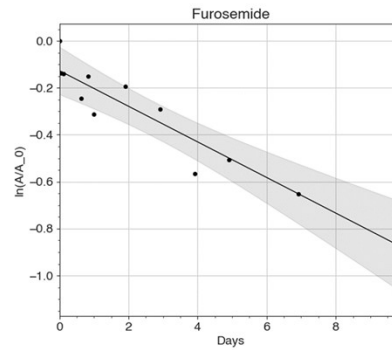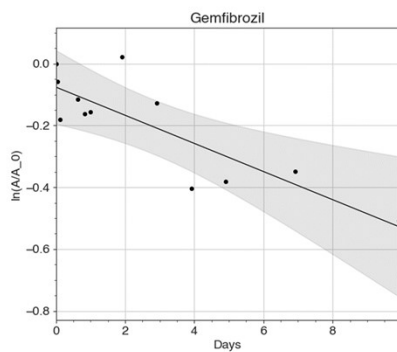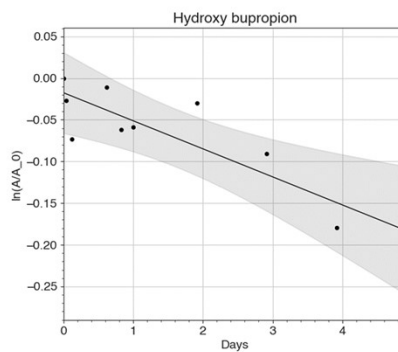

### g) F3 replicate A (continued)

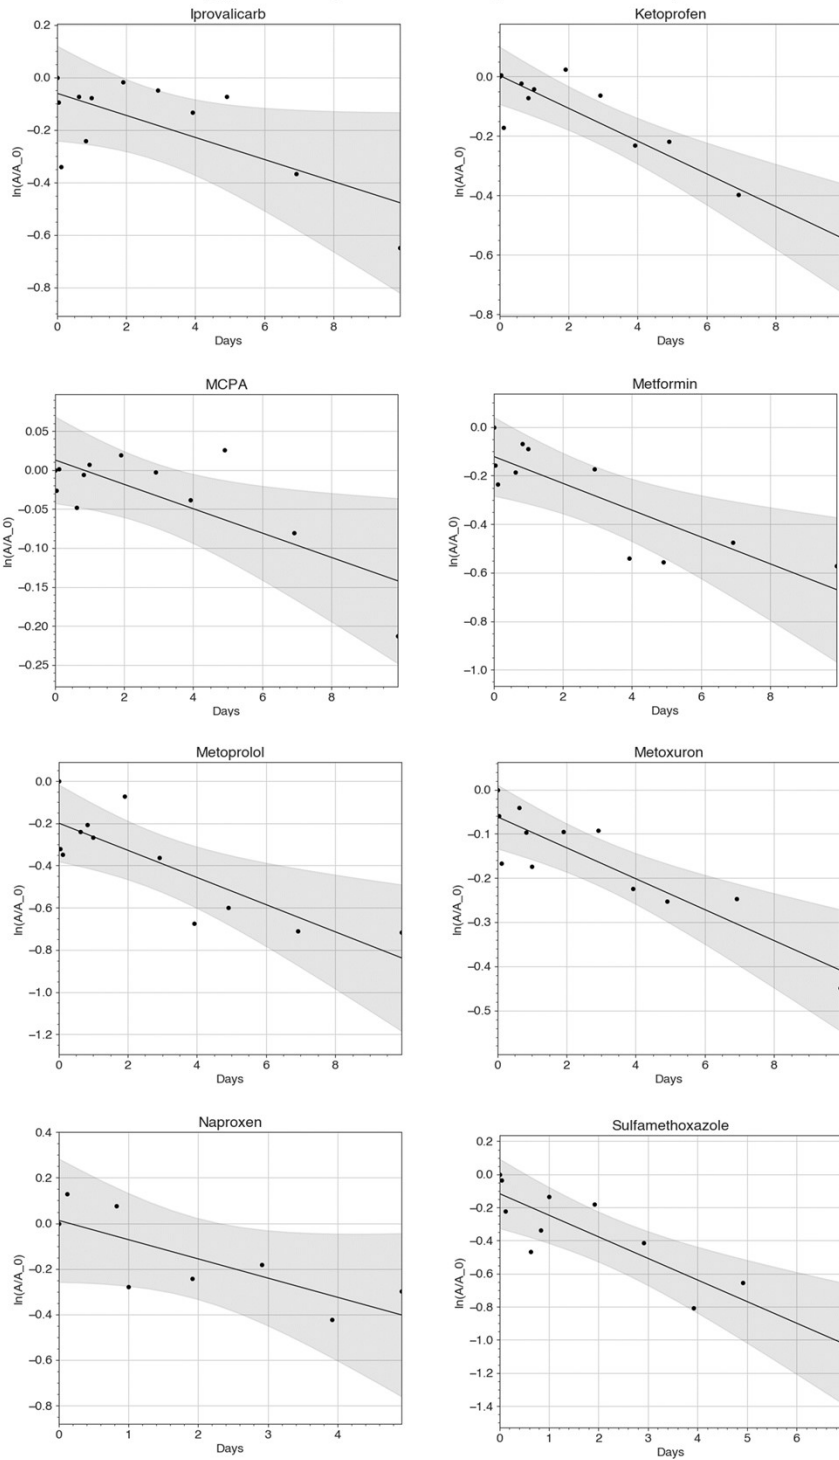

### g) F3 replicate A (continued)

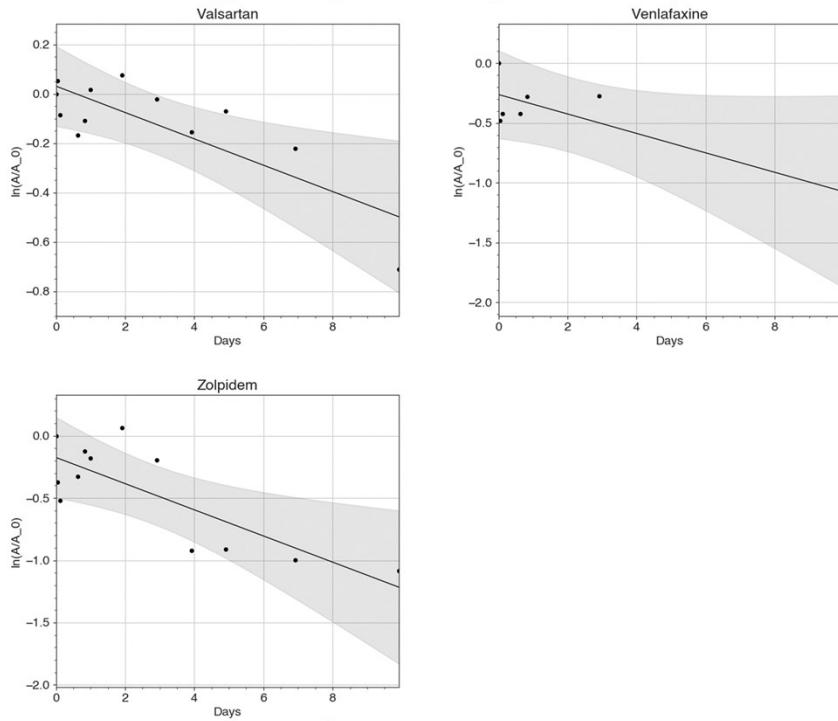

### h) F3 replicate B

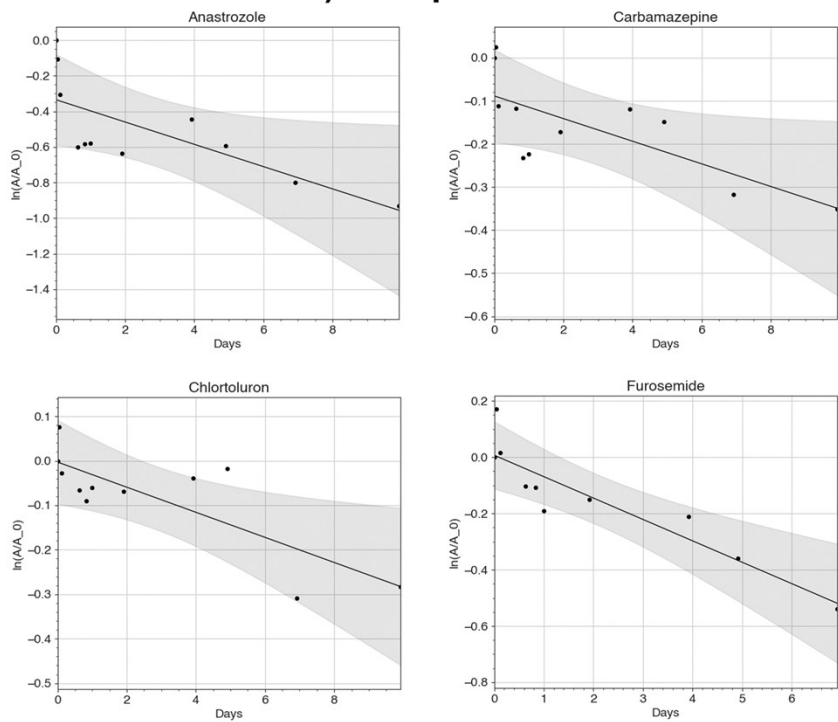

## h) F3 replicate B (continued)

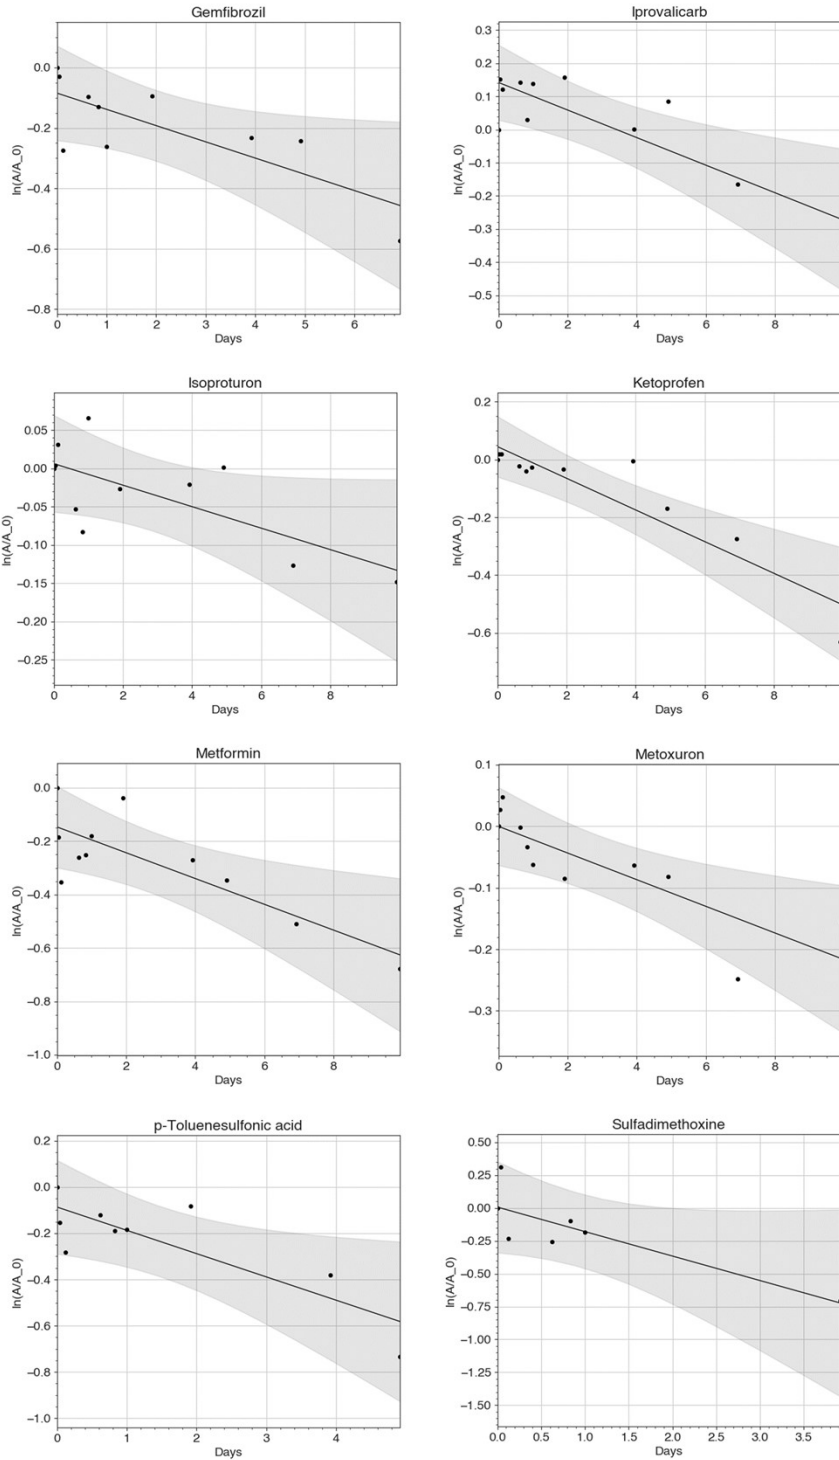

### h) F3 replicate B (continued)

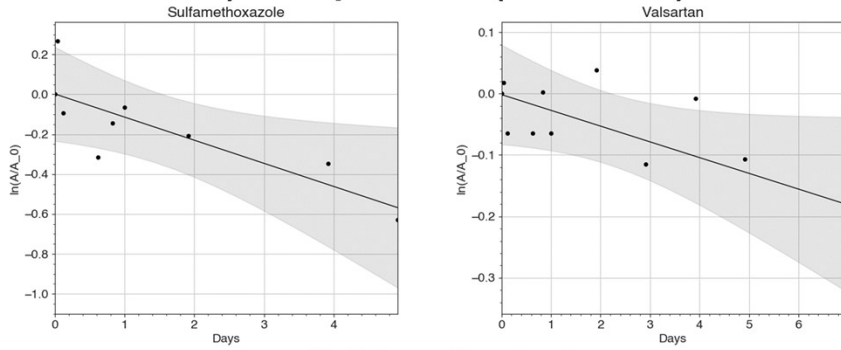

### i) F3 replicate C

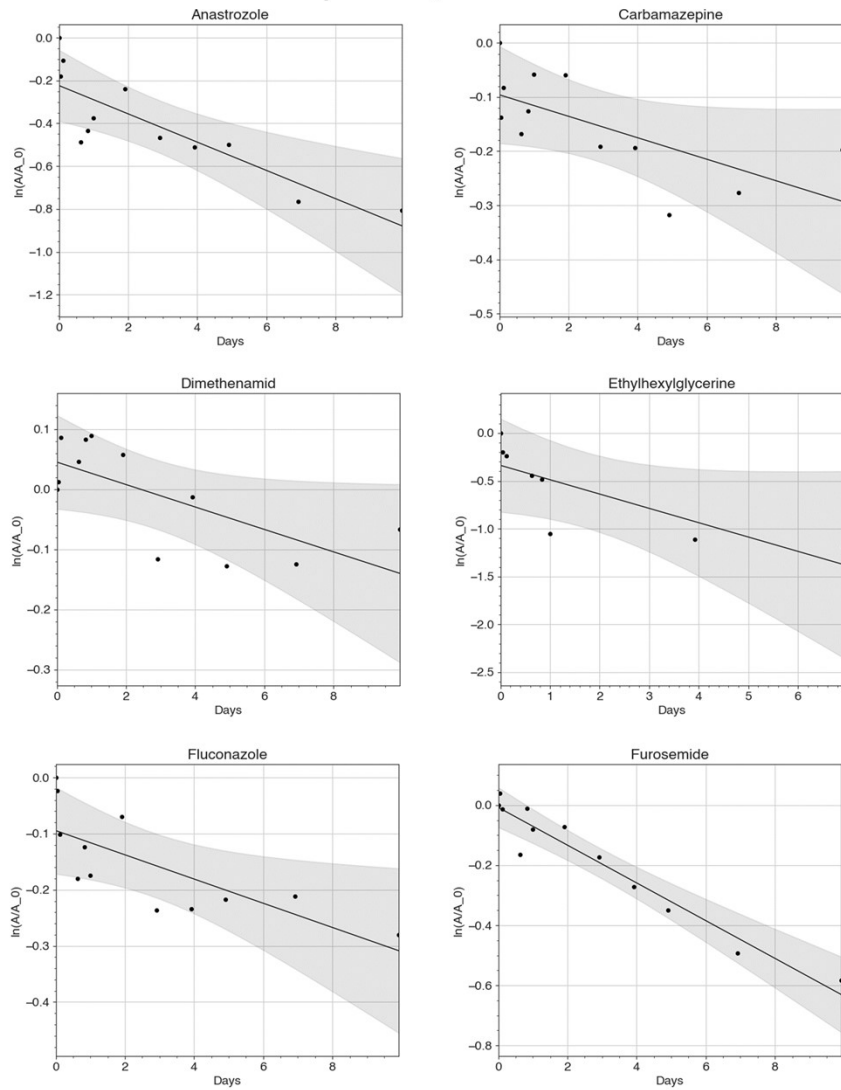

### i) F3 replicate C (continued)

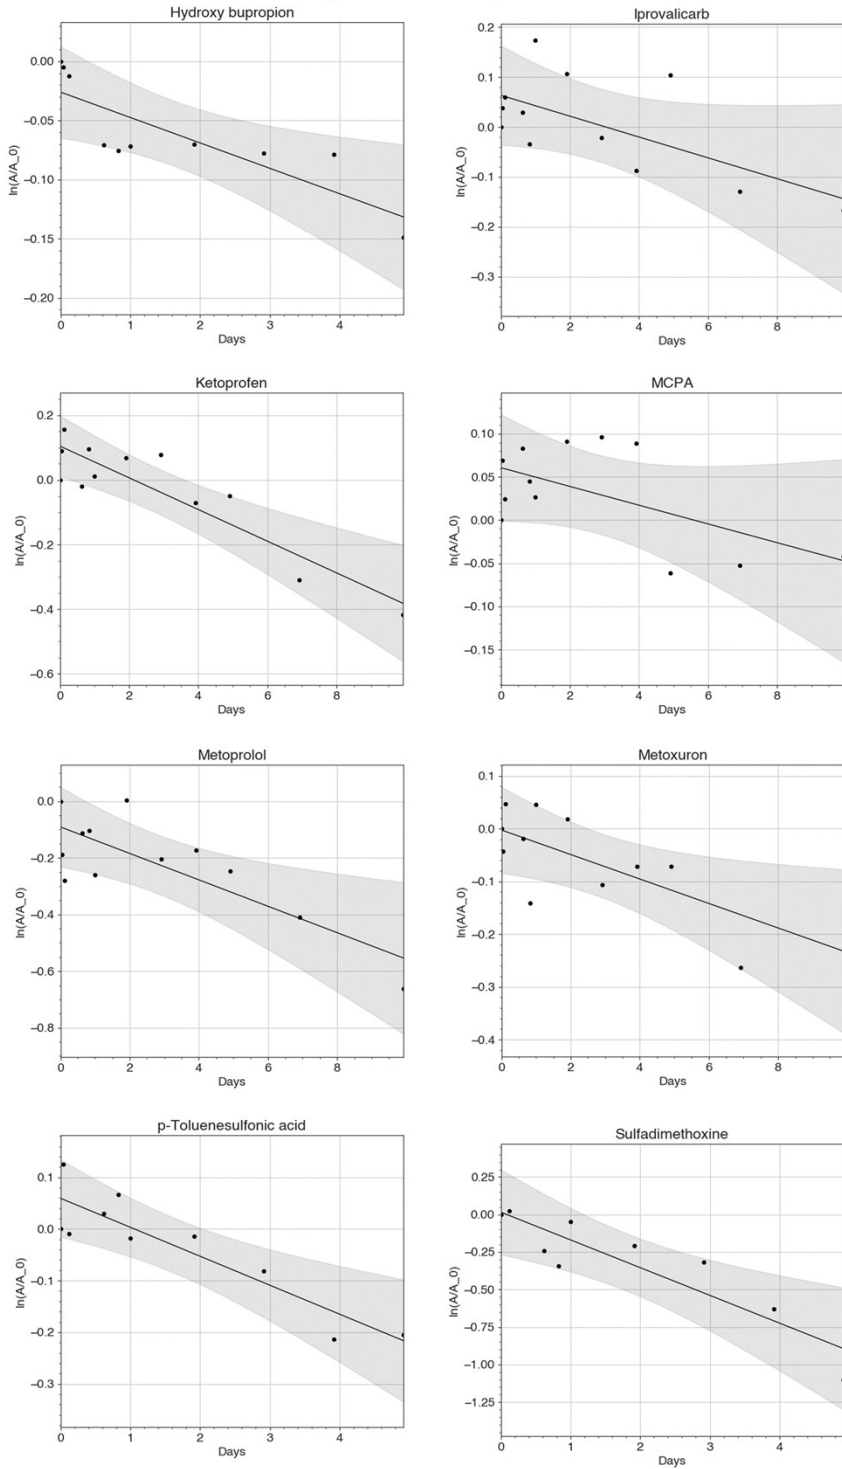

### i) F3 replicate C (continued)

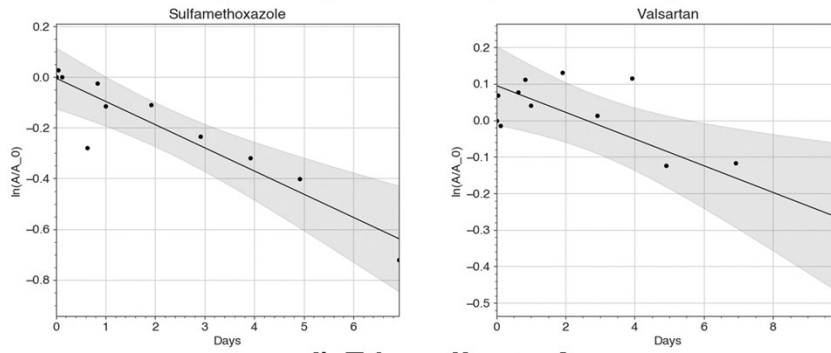

### j) F4 replicate A

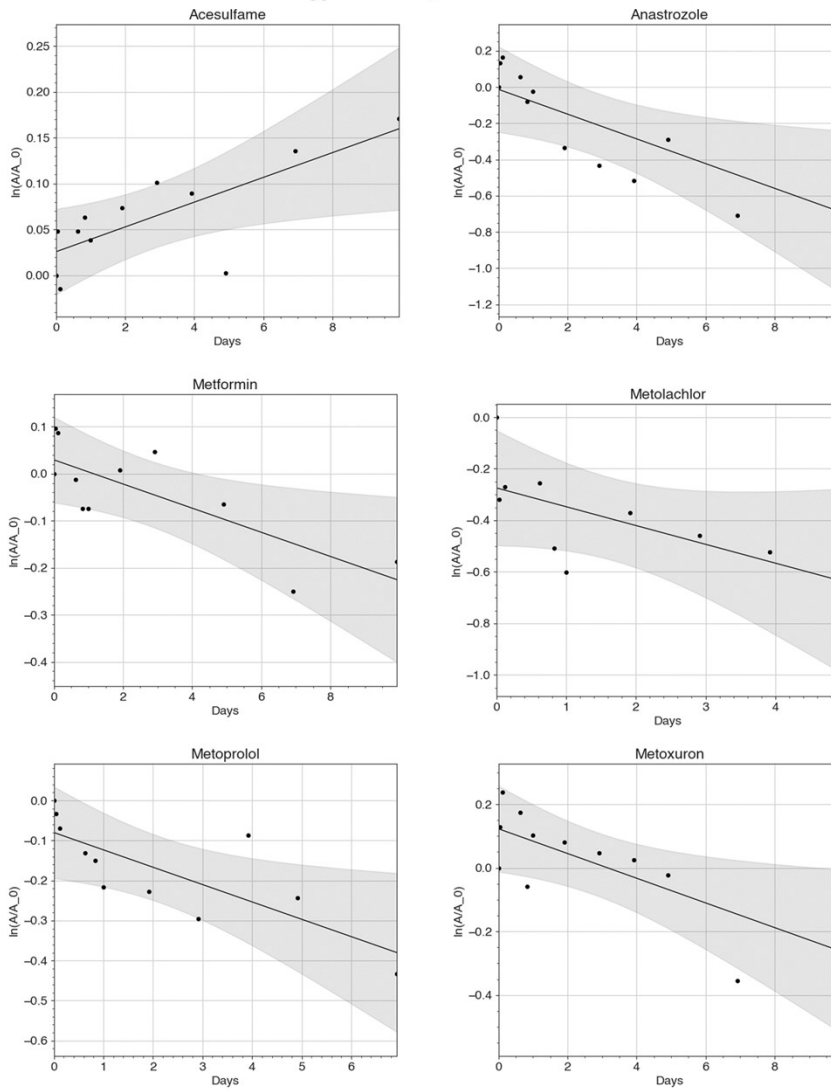

### j) F4 replicate A (continued)

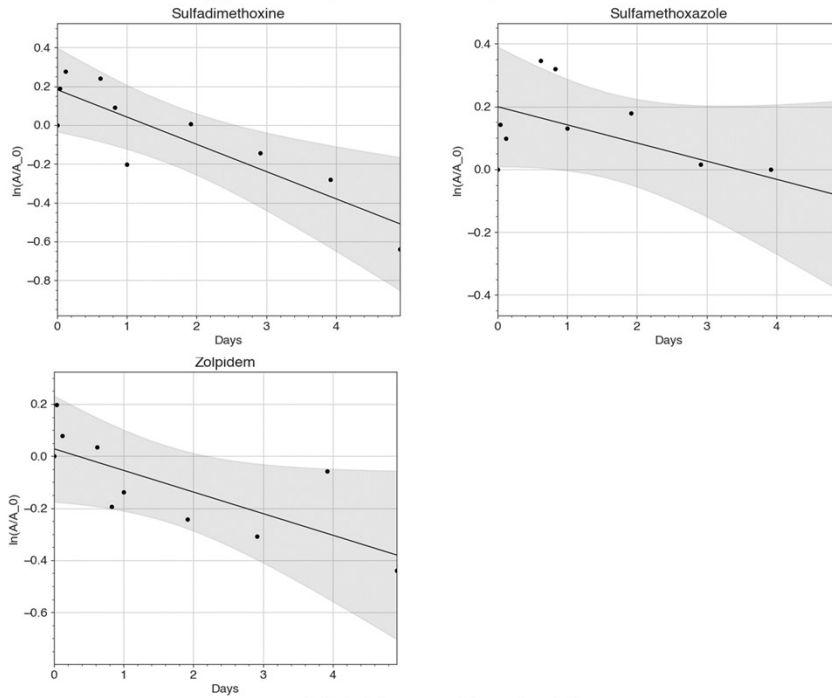

### k) F4 replicate B

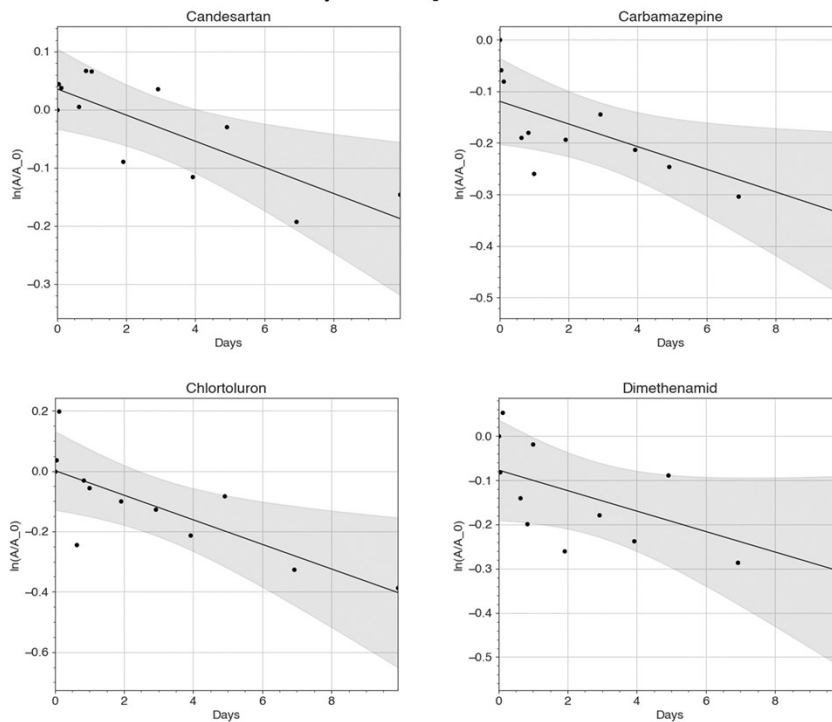

### k) F4 replicate B (continued)

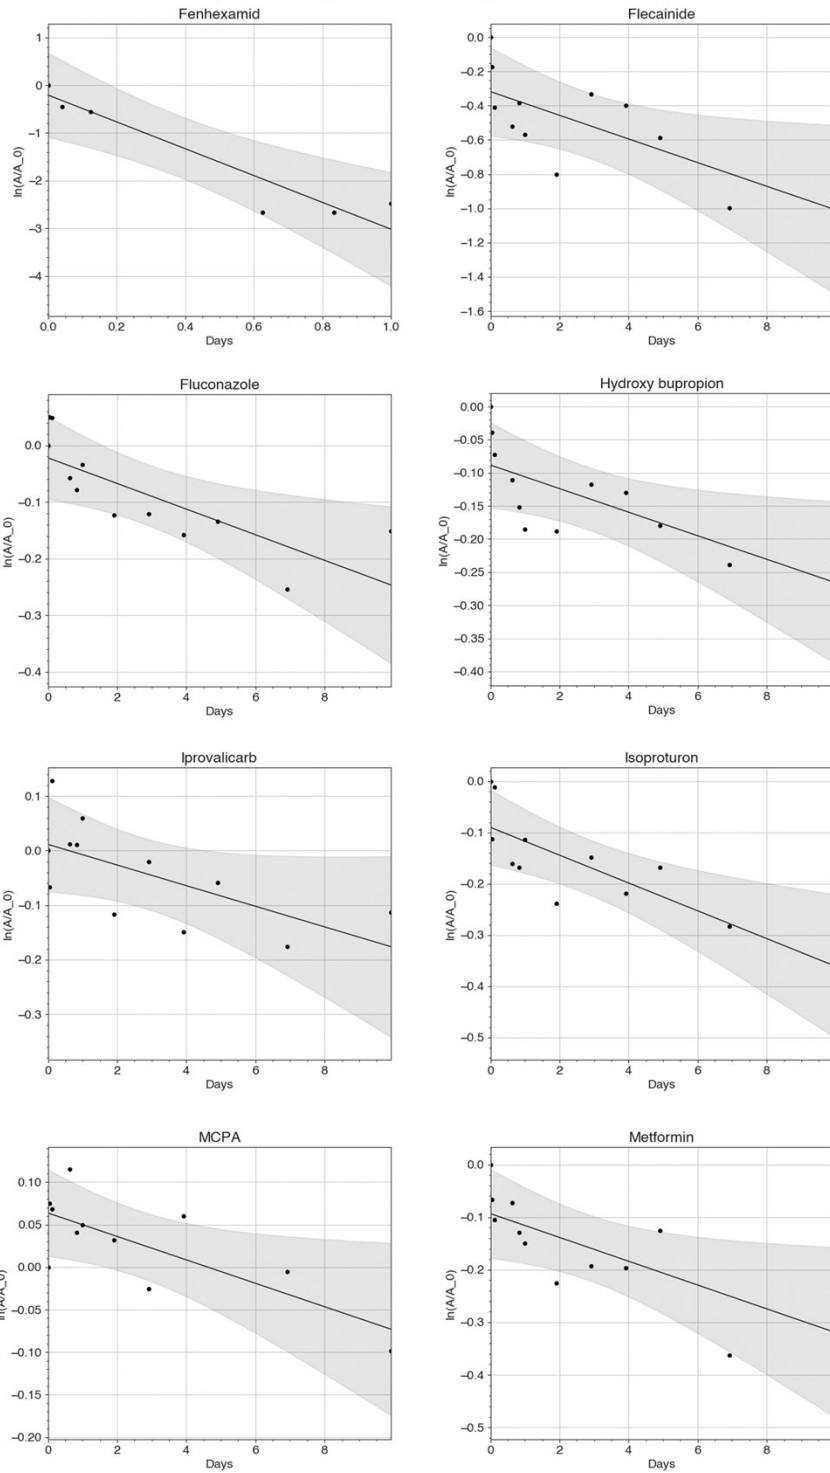

### k) F4 replicate B (continued)

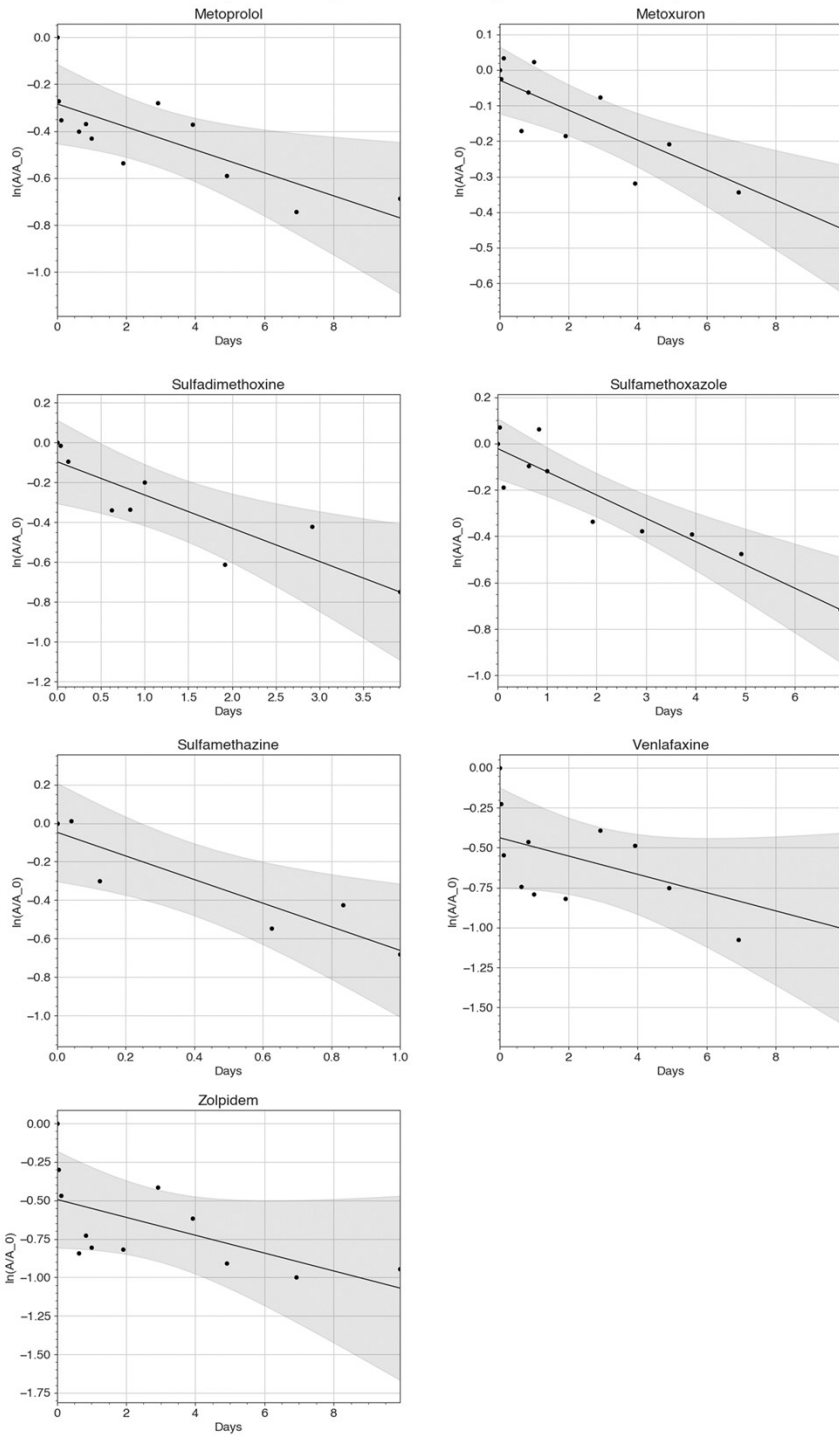

# I) F4 replicate C

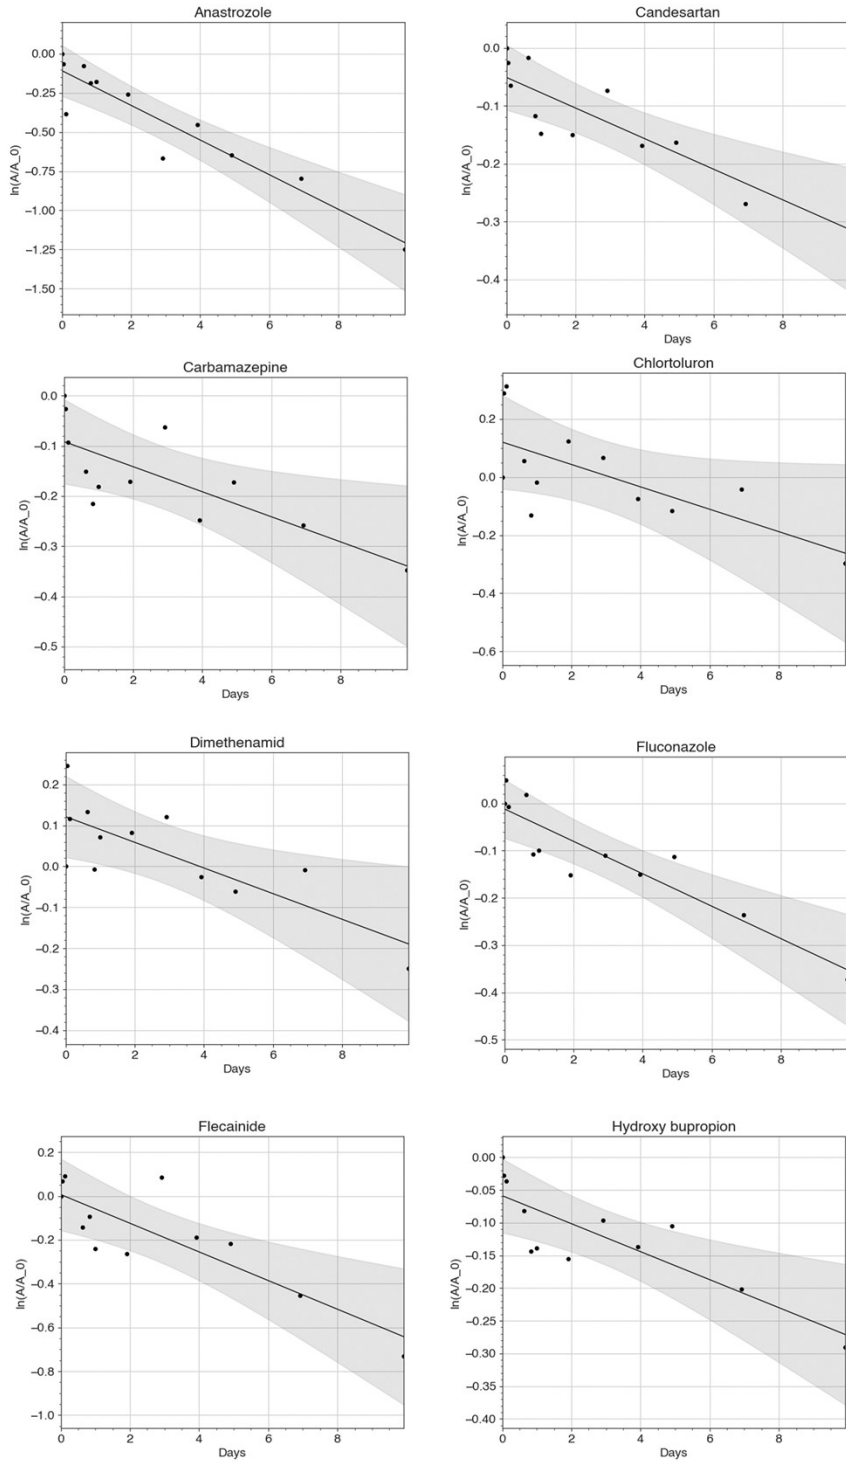

### I) F4 replicate C (continued)

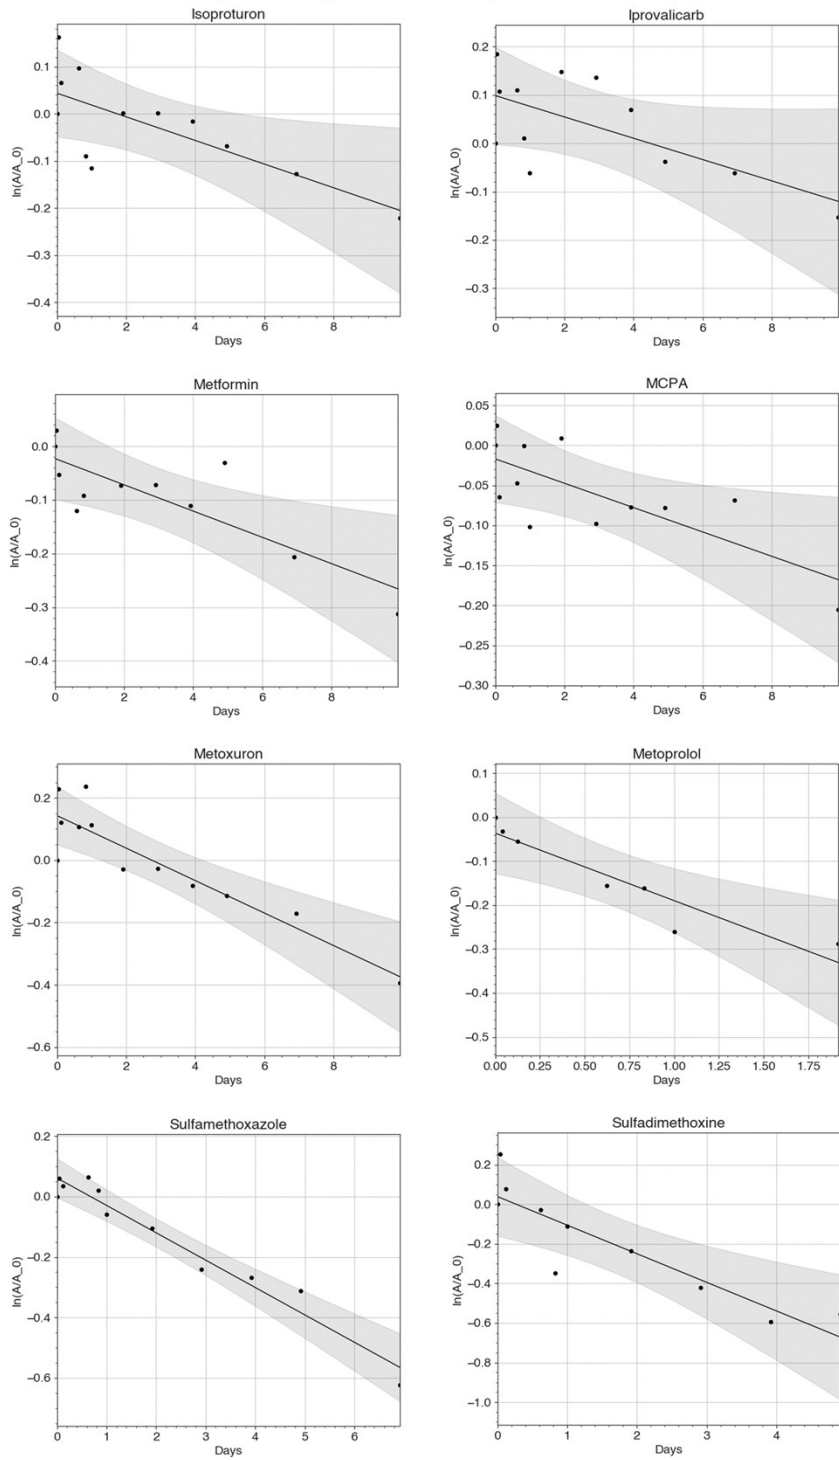

### I) F4 replicate C (continued)

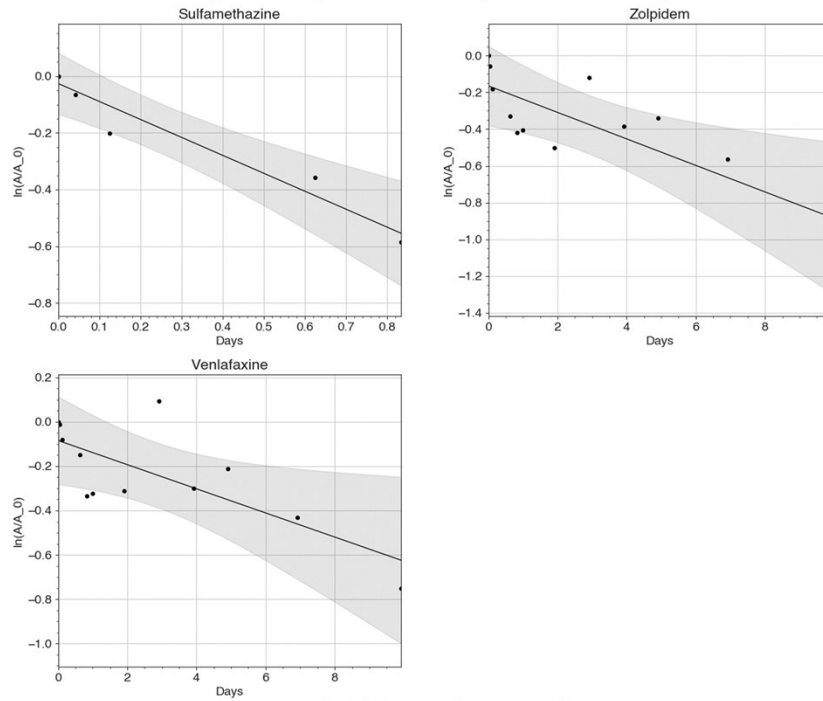

### m) F5 replicate A

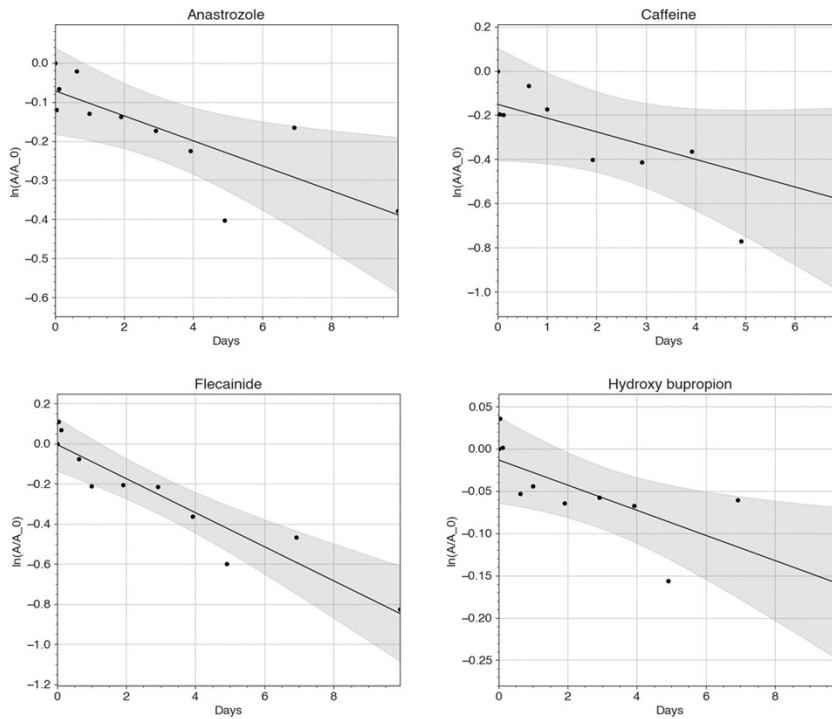

### m) F5 replicate A (continued)

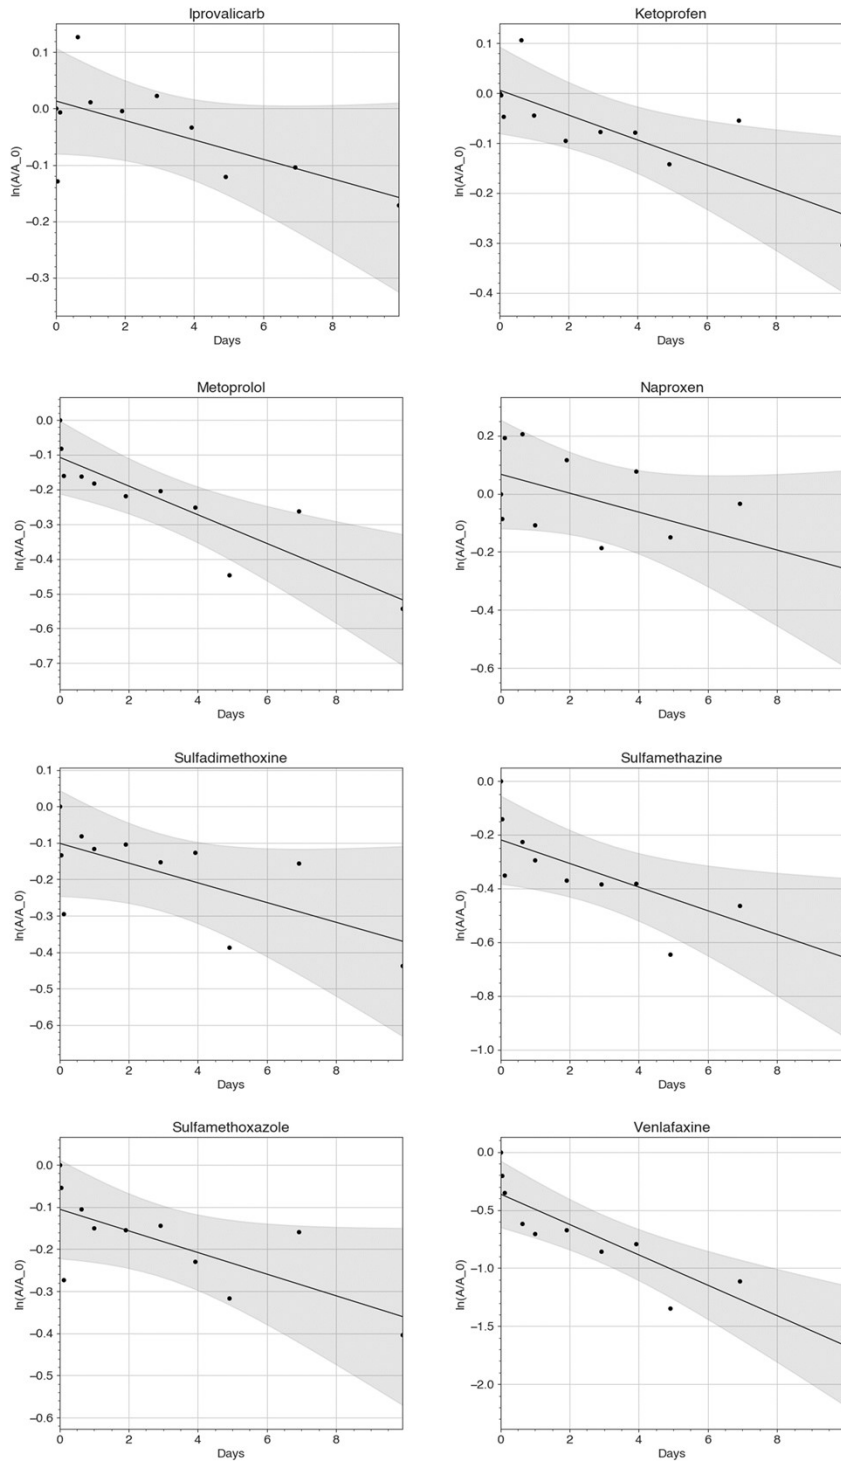

### m) F5 replicate A (continued)

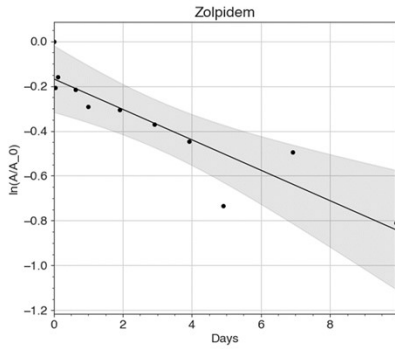

### n) F5 replicate B

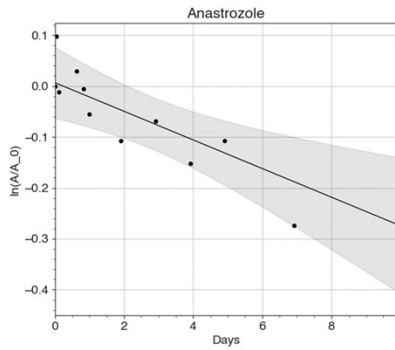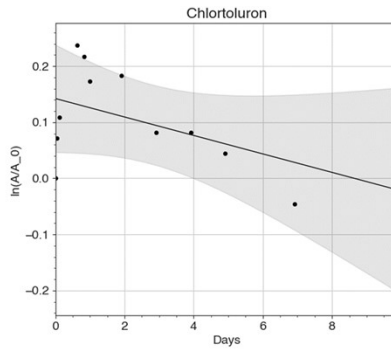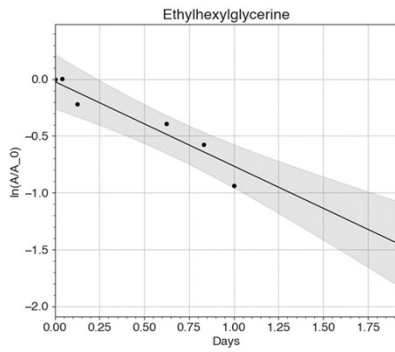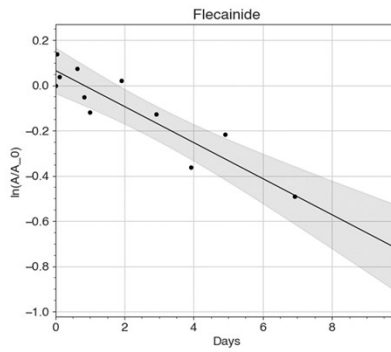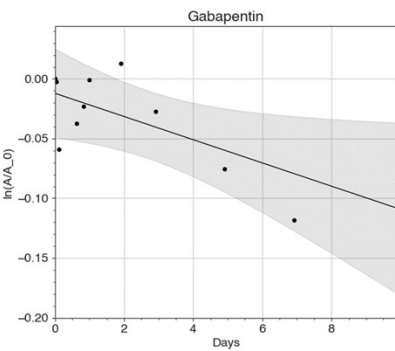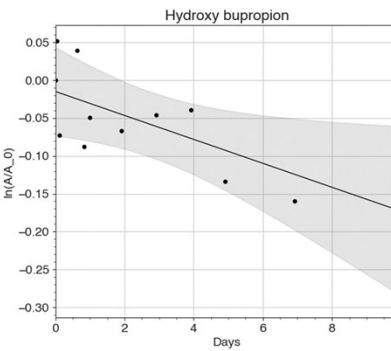

## n) F5 replicate B (continued)

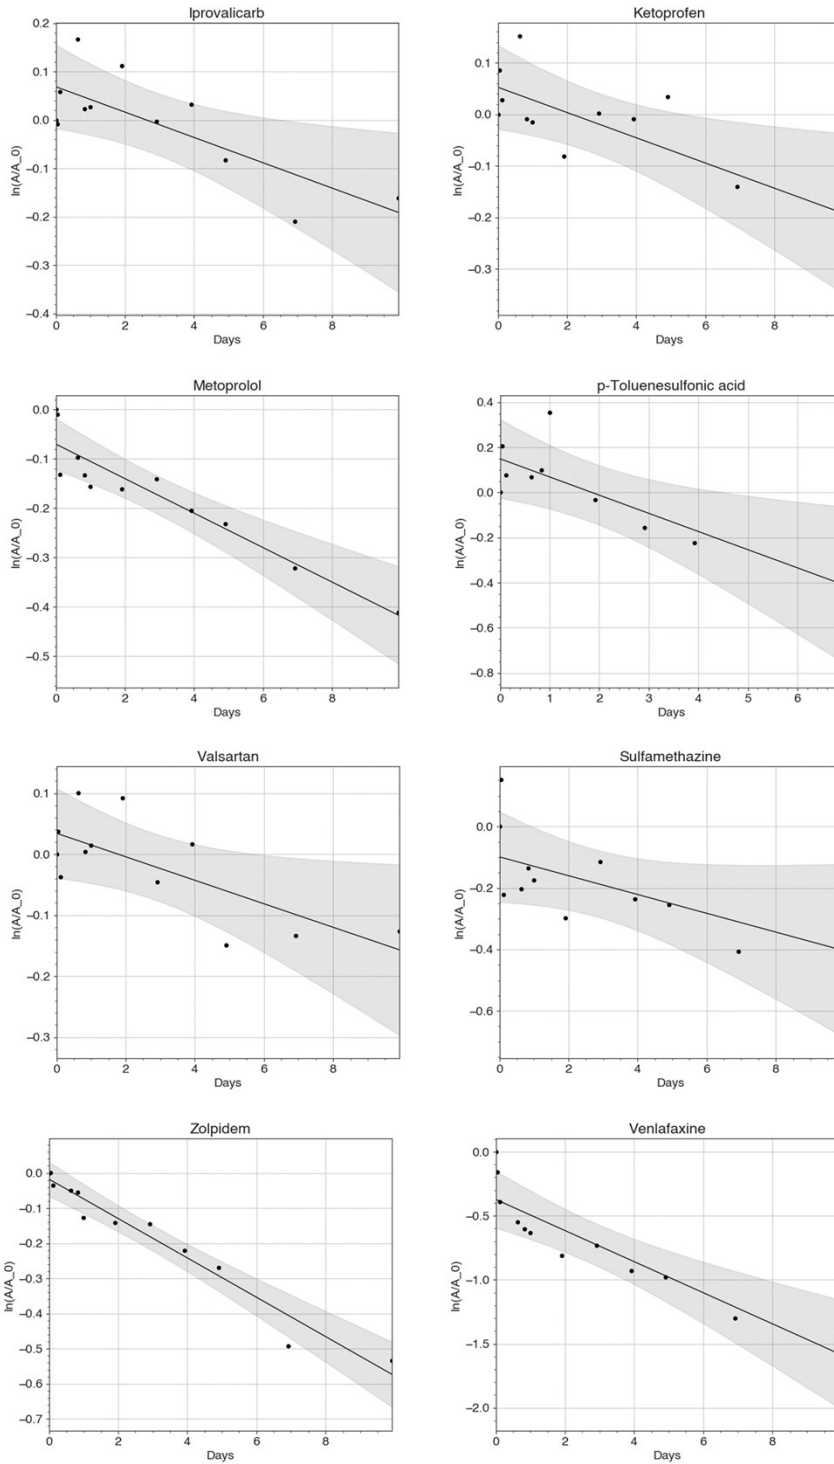

### o) F5 replicate C

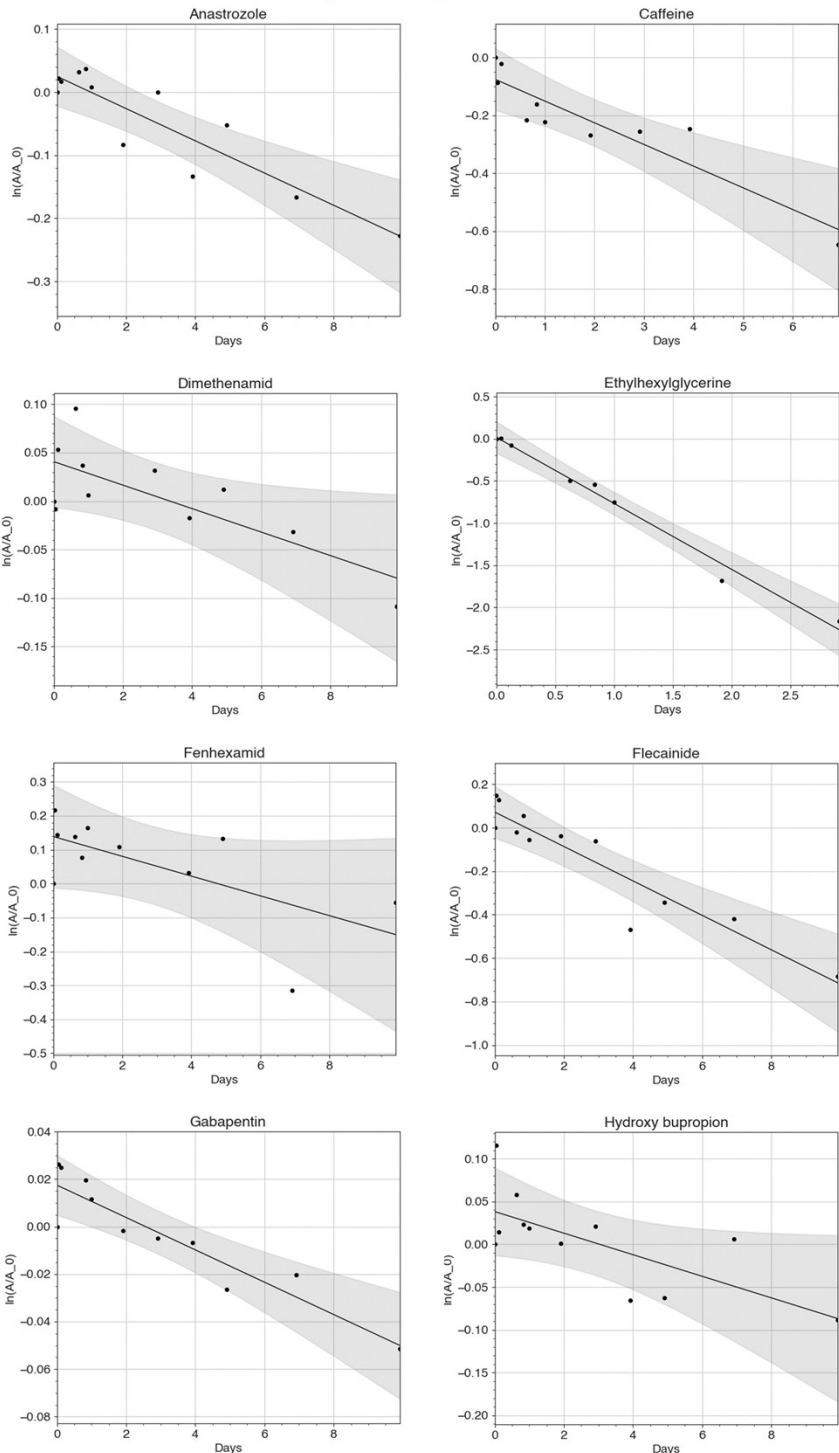

### o) F5 replicate C (continued)

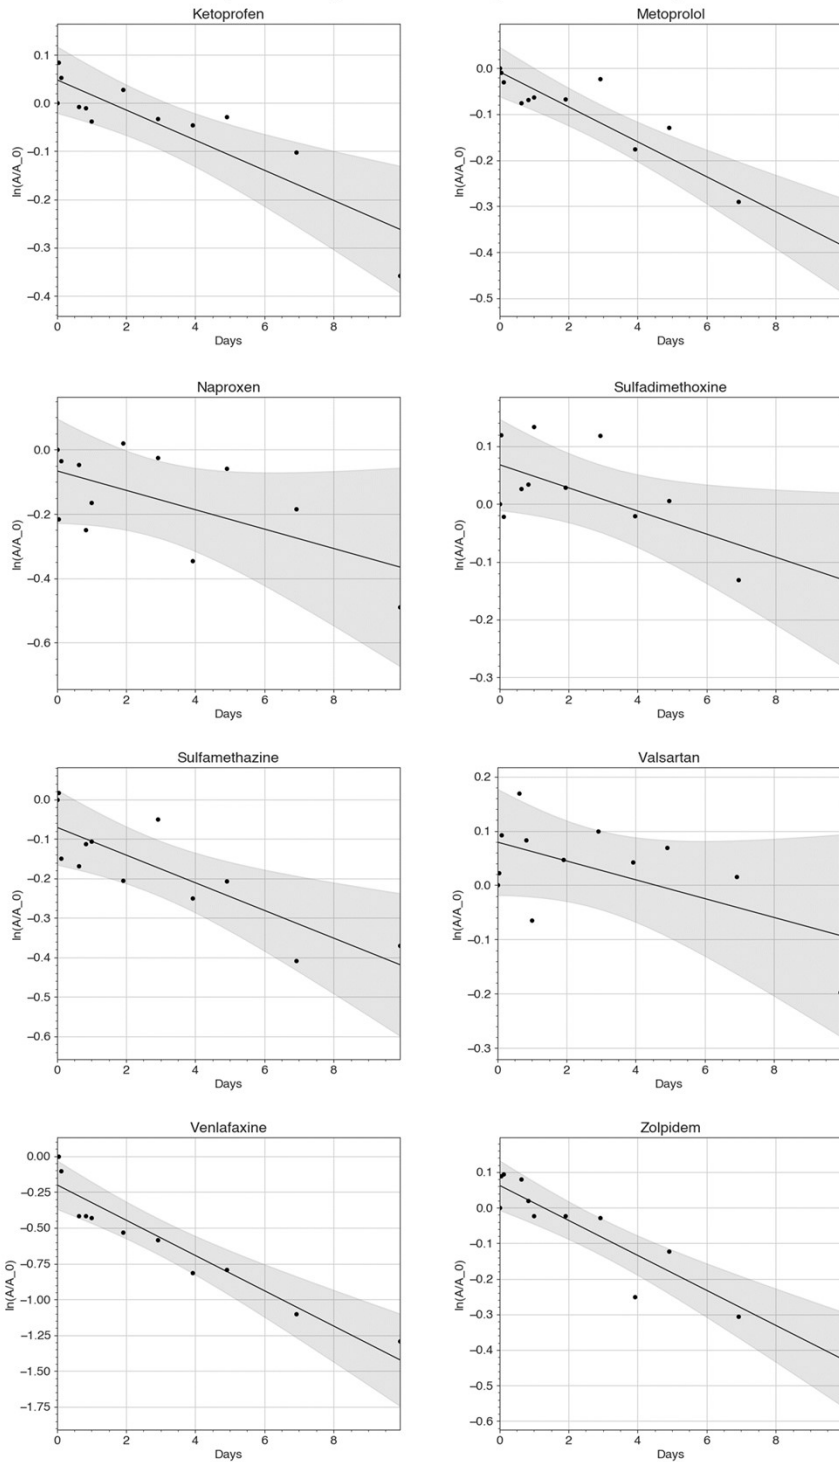

### p) F6 replicate A

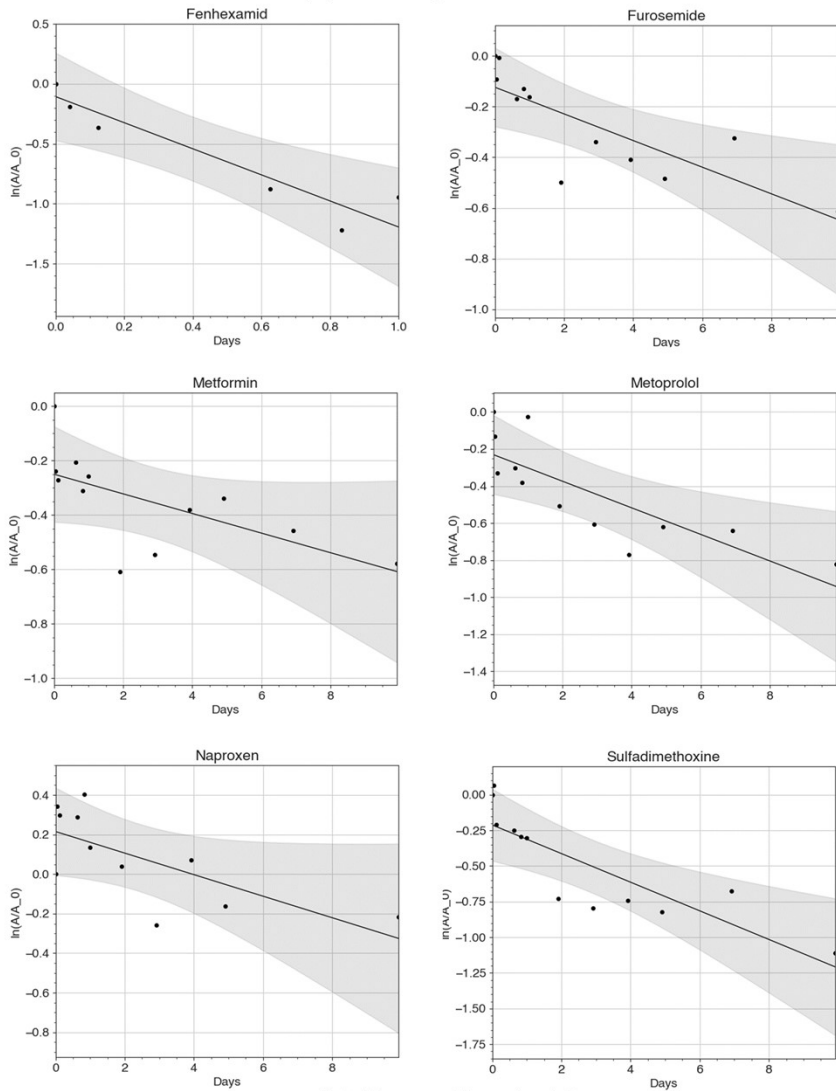

### q) F6 replicate B

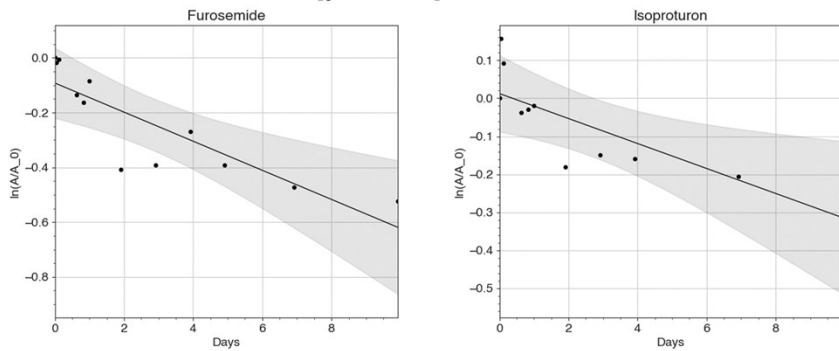

### q) F6 replicate B (continued)

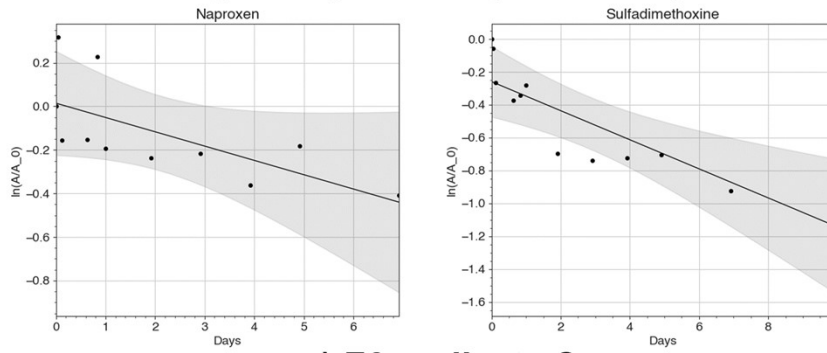

### r) F6 replicate C

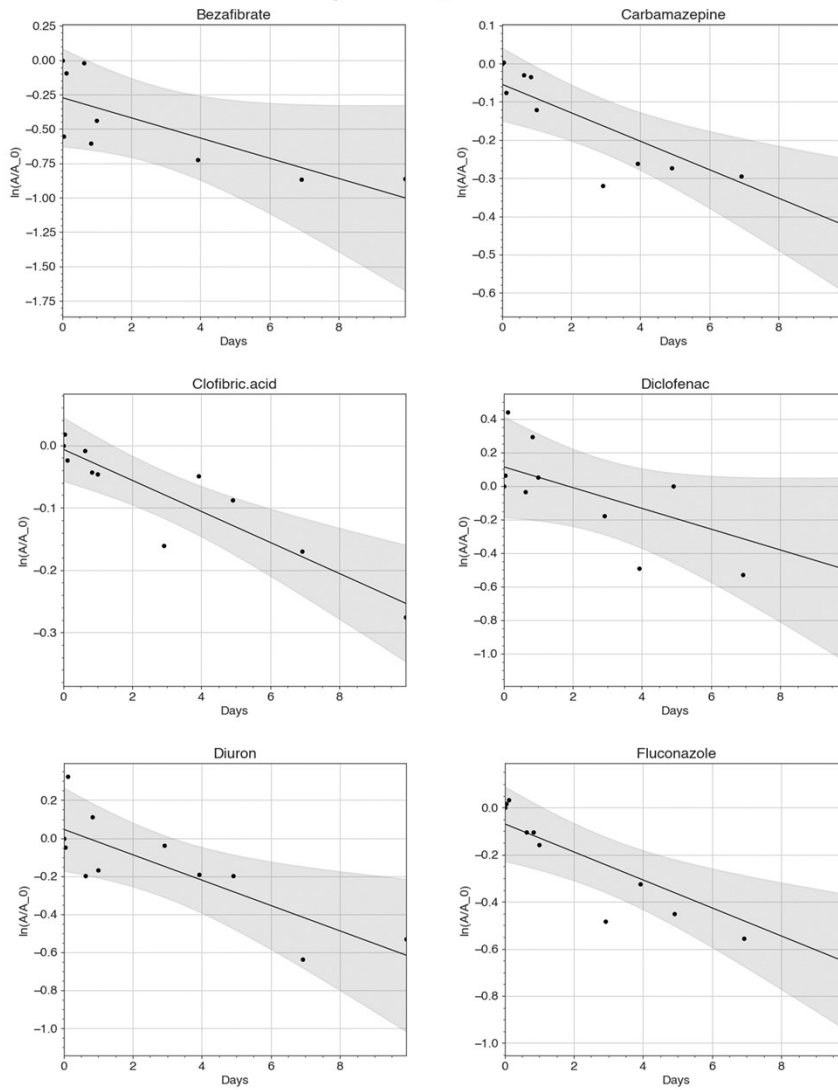

### r) F6 replicate C (continued)

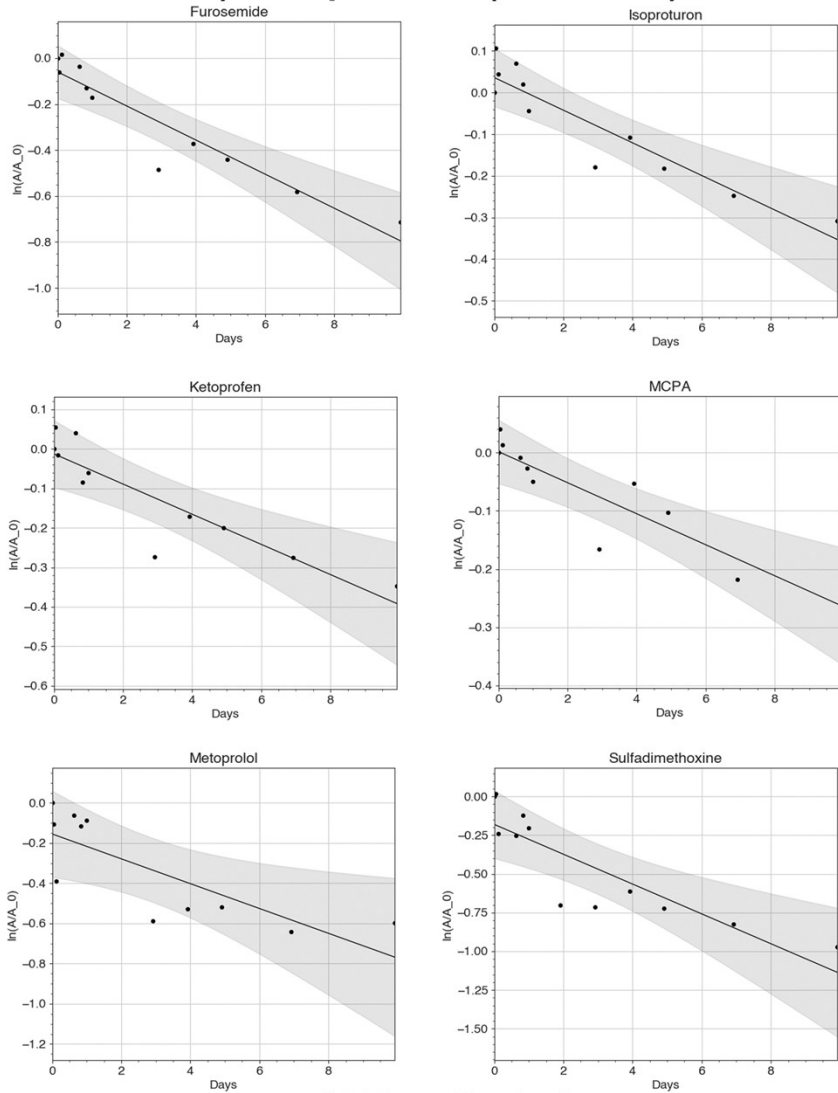

### s) F7 replicate A

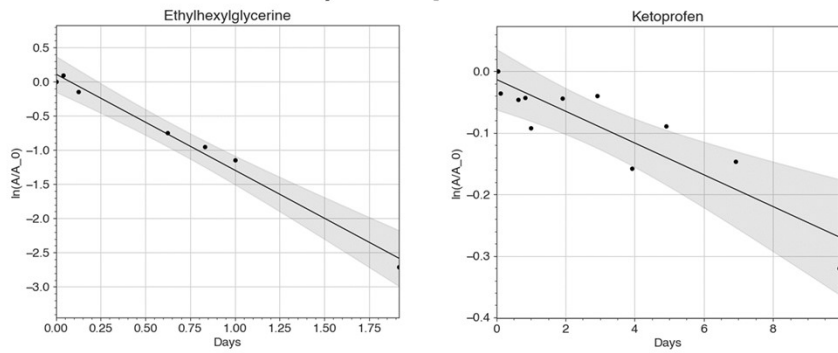

### s) F7 replicate A (continued)

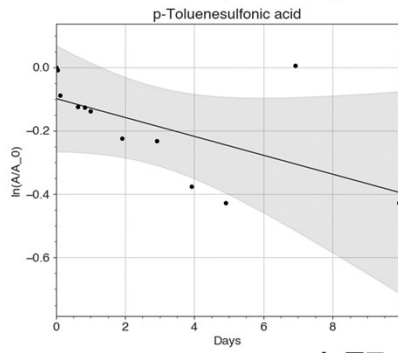

### t) F7 replicate B

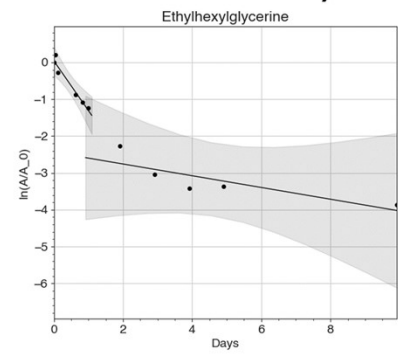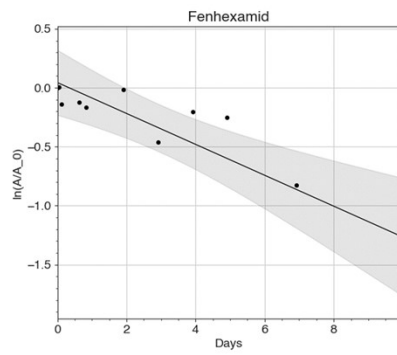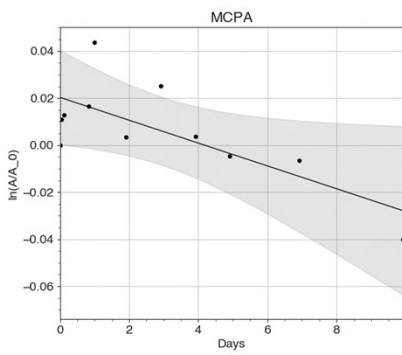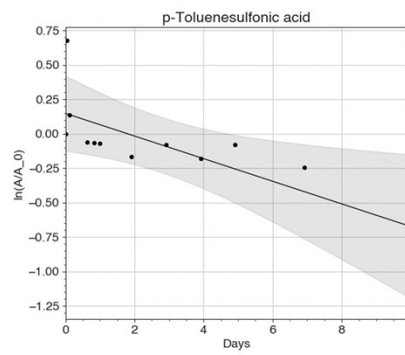

### u) F7 replicate C

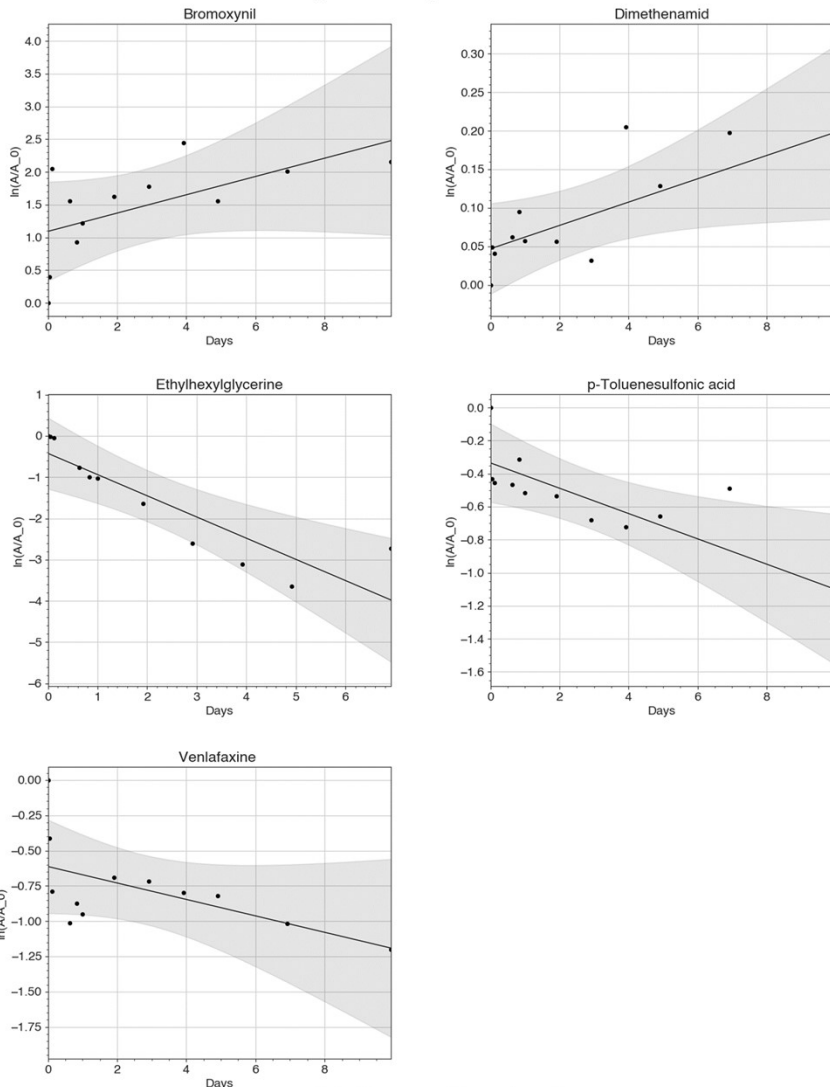

### v) F8 replicate A

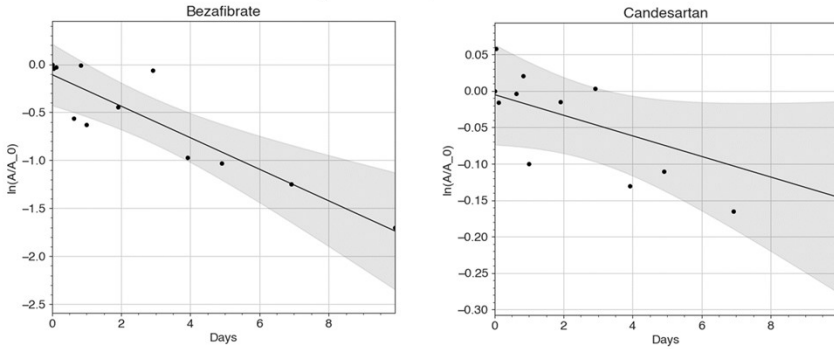

### v) F8 replicate A (continued)

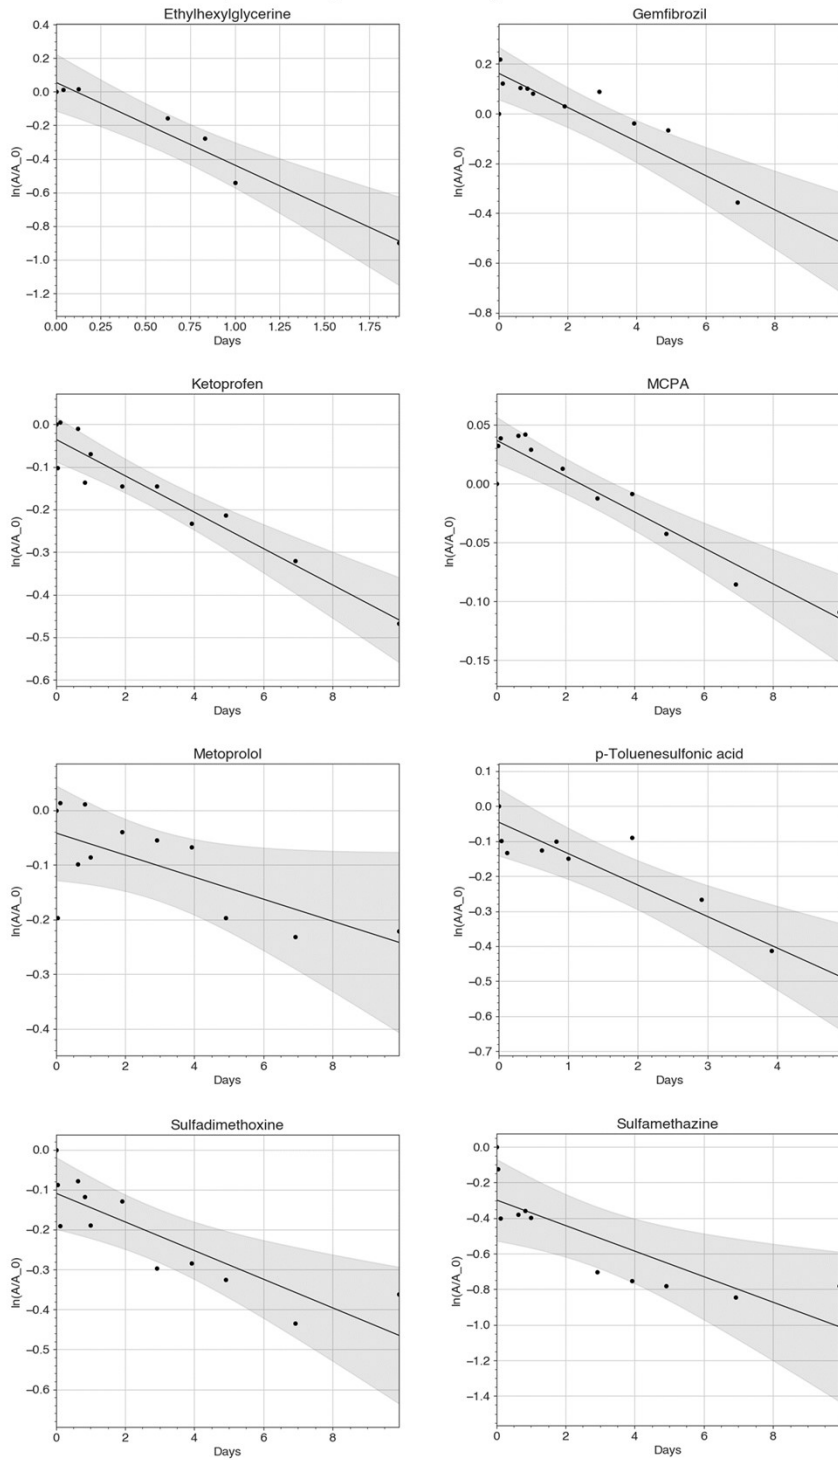

### v) F8 replicate A (continued)

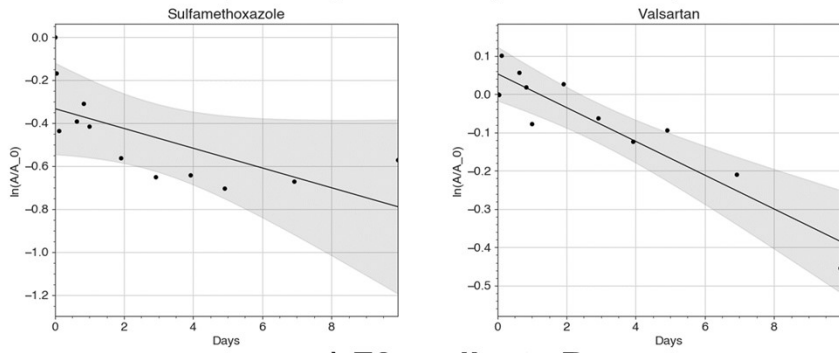

### w) F8 replicate B

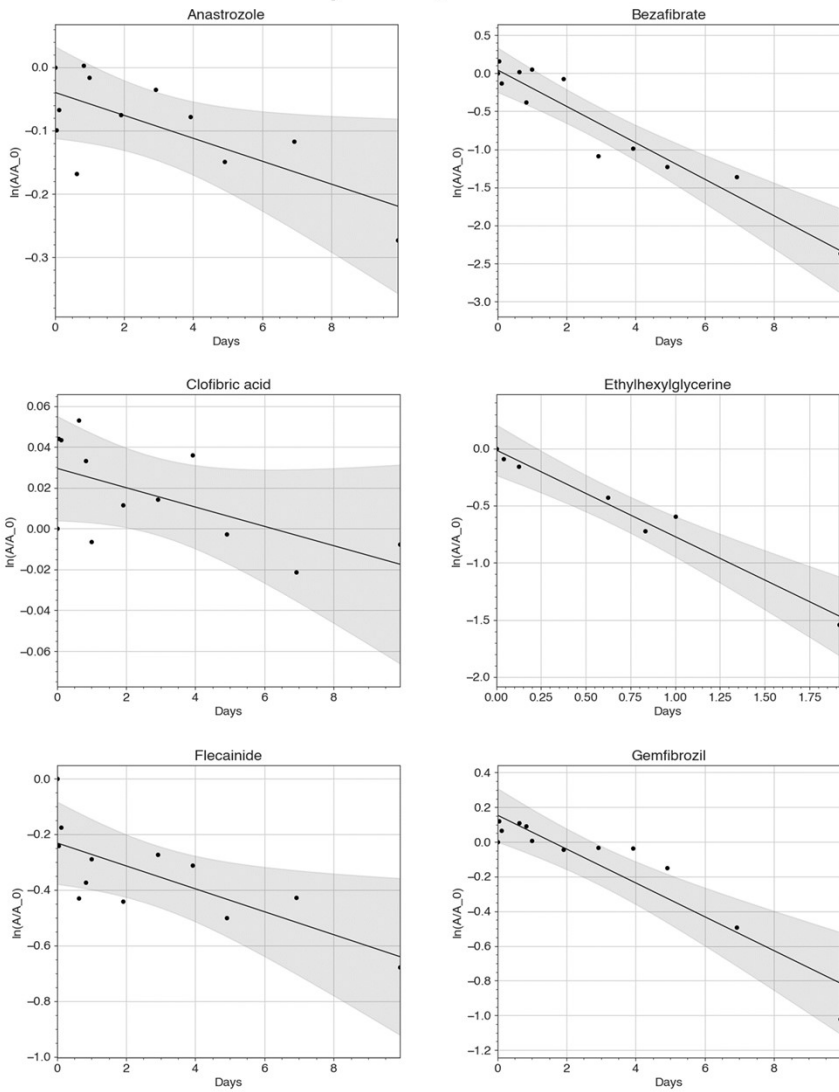

### w) F8 replicate B (continued)

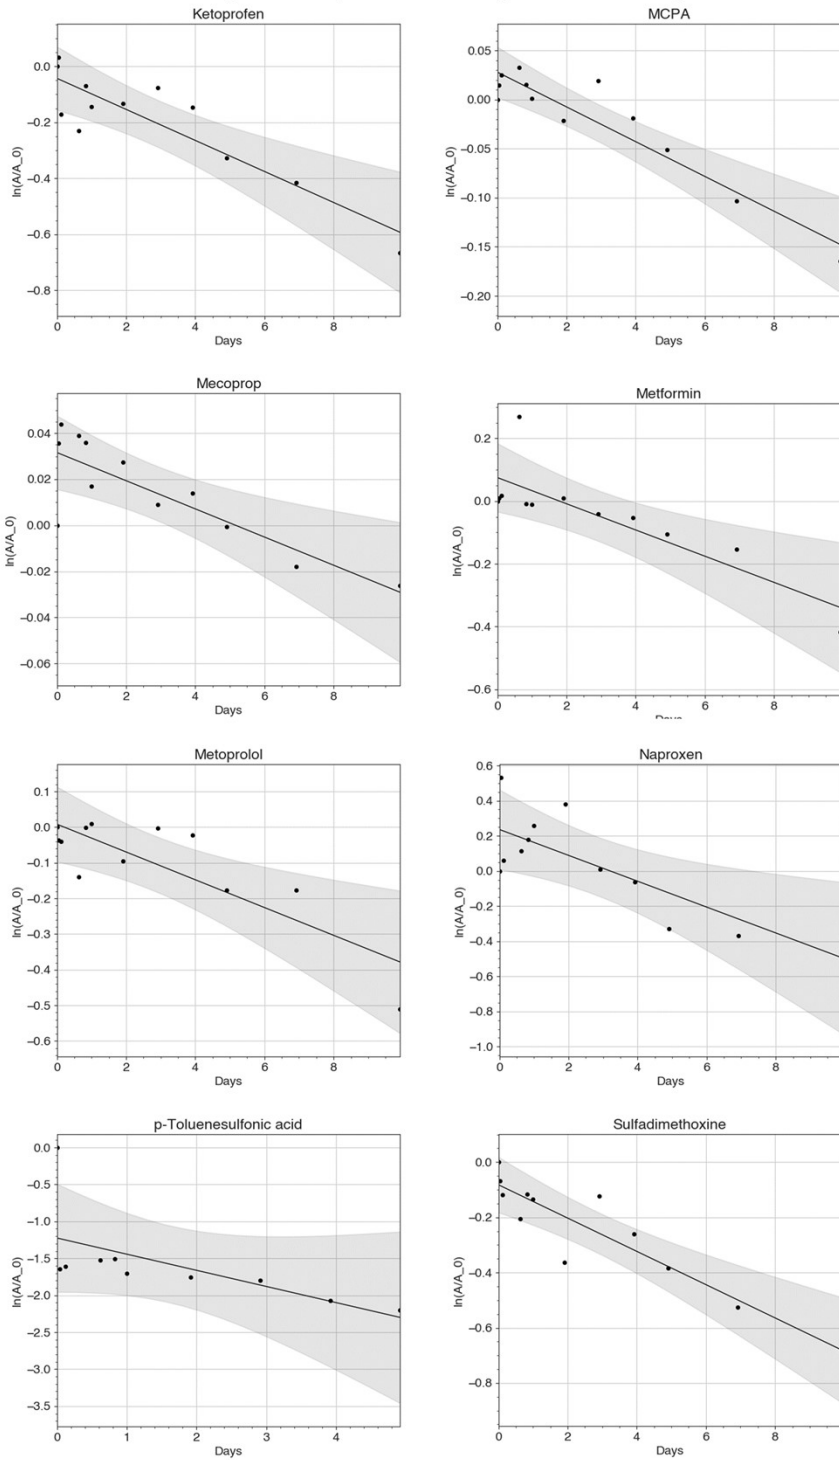

### w) F8 replicate B (continued)

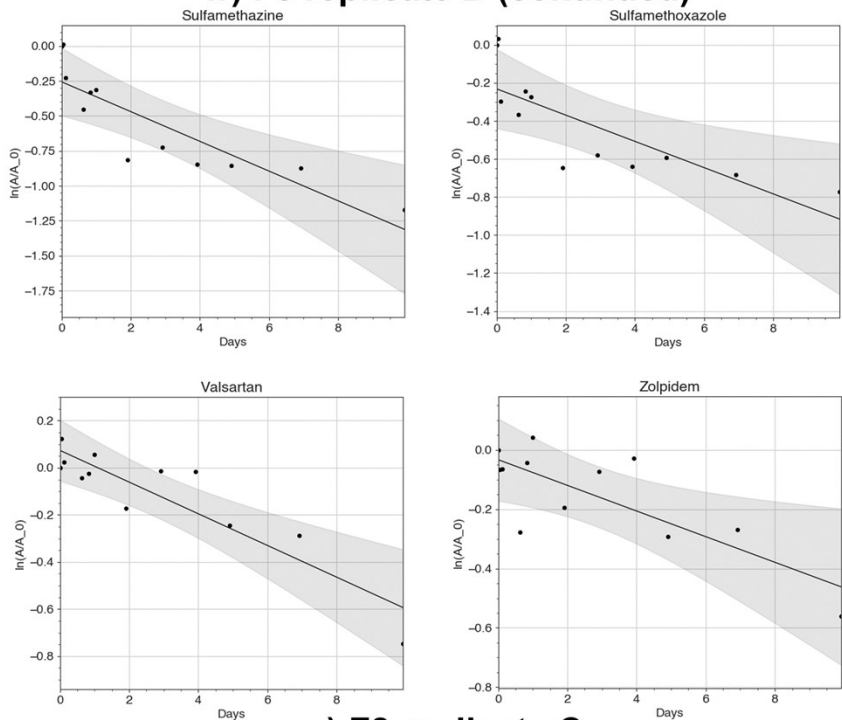

### x) F8 replicate C

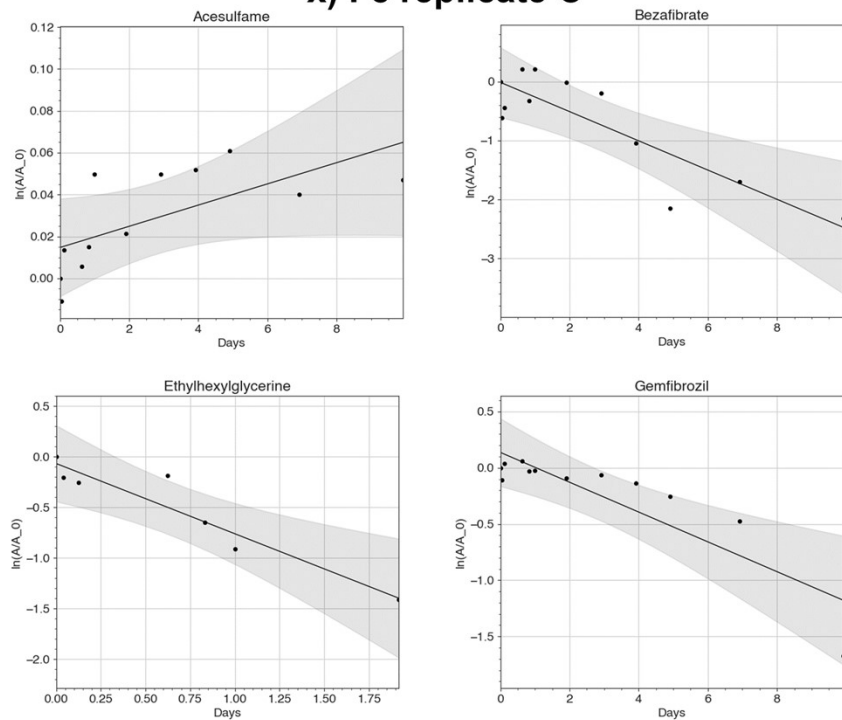

### x) F8 replicate C (continued)

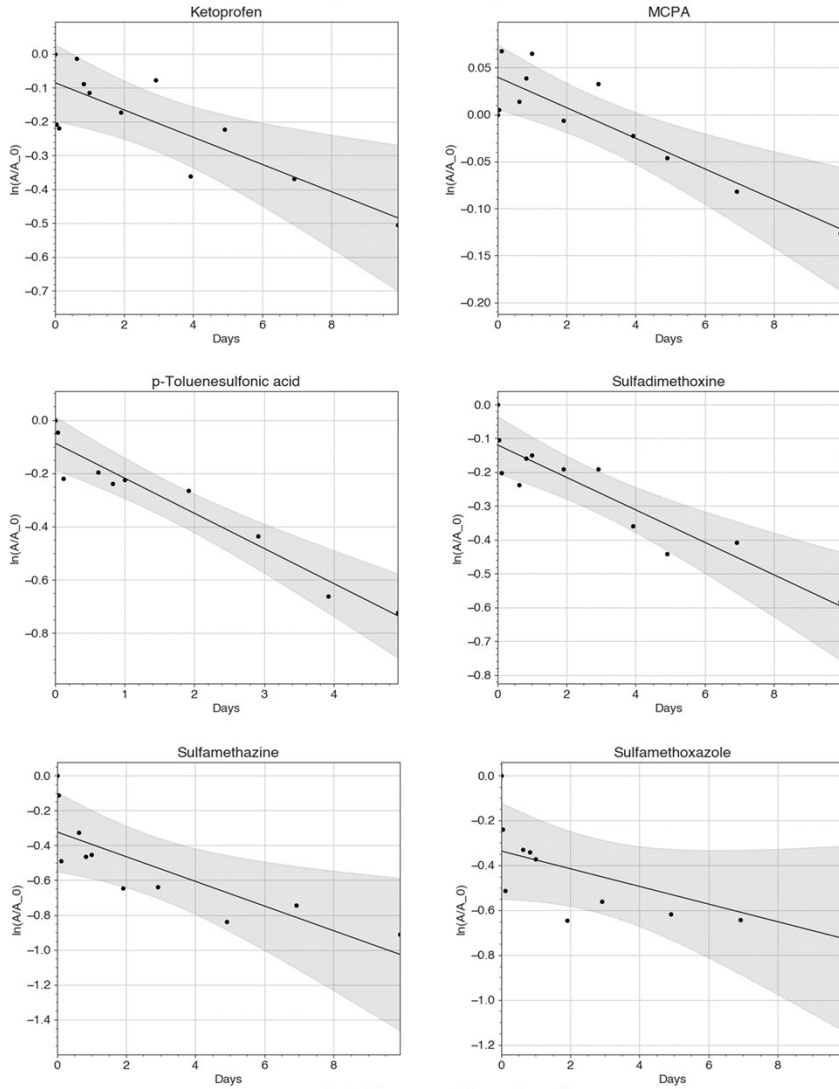

### y) F9 replicate A

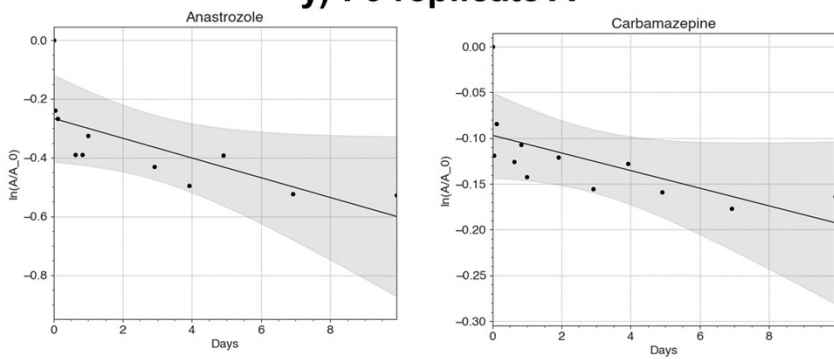

### y) F9 replicate A (continued)

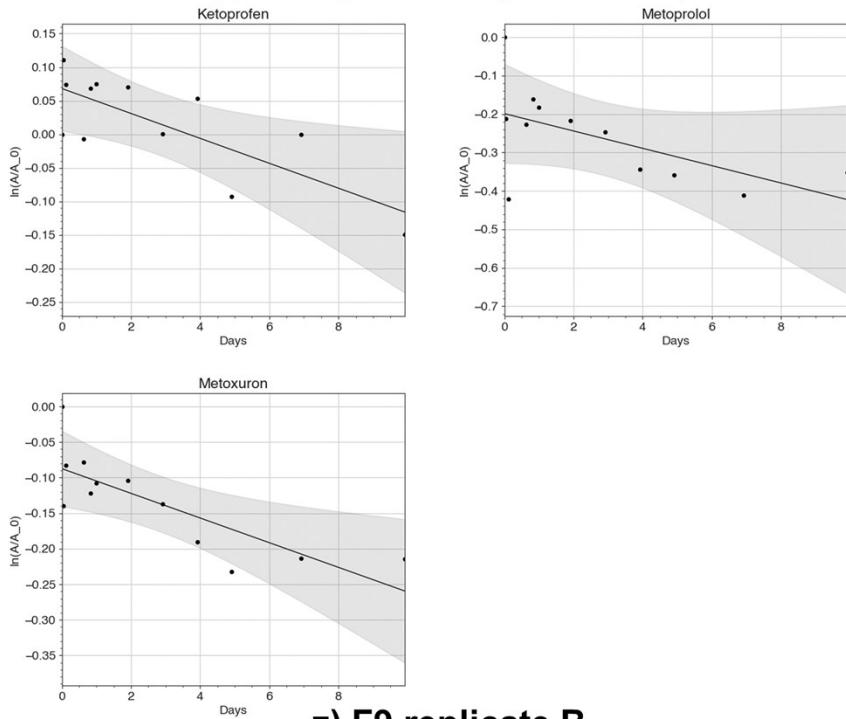

### z) F9 replicate B

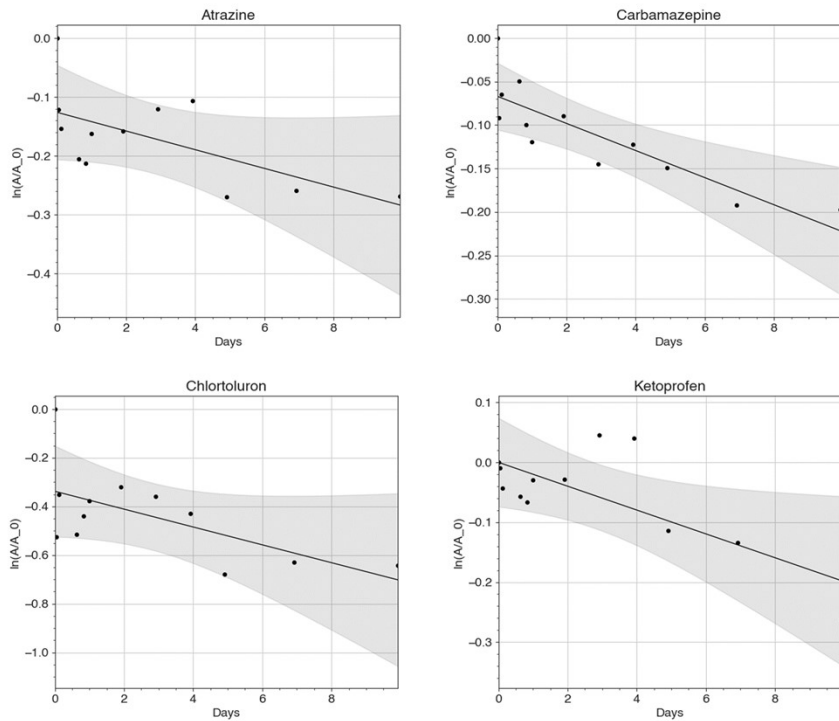

### z) F9 replicate B (continued)

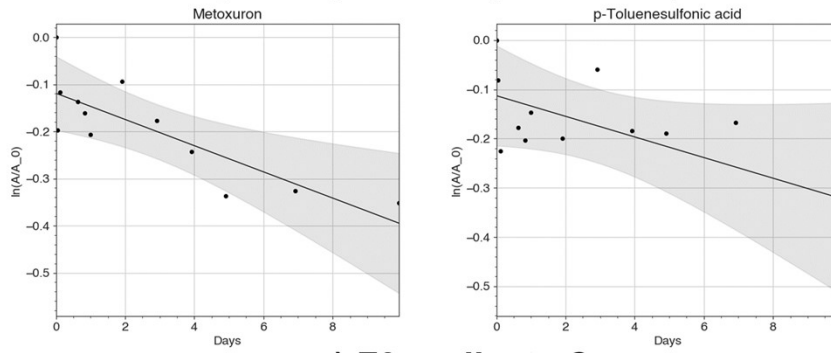

### aa) F9 replicate C

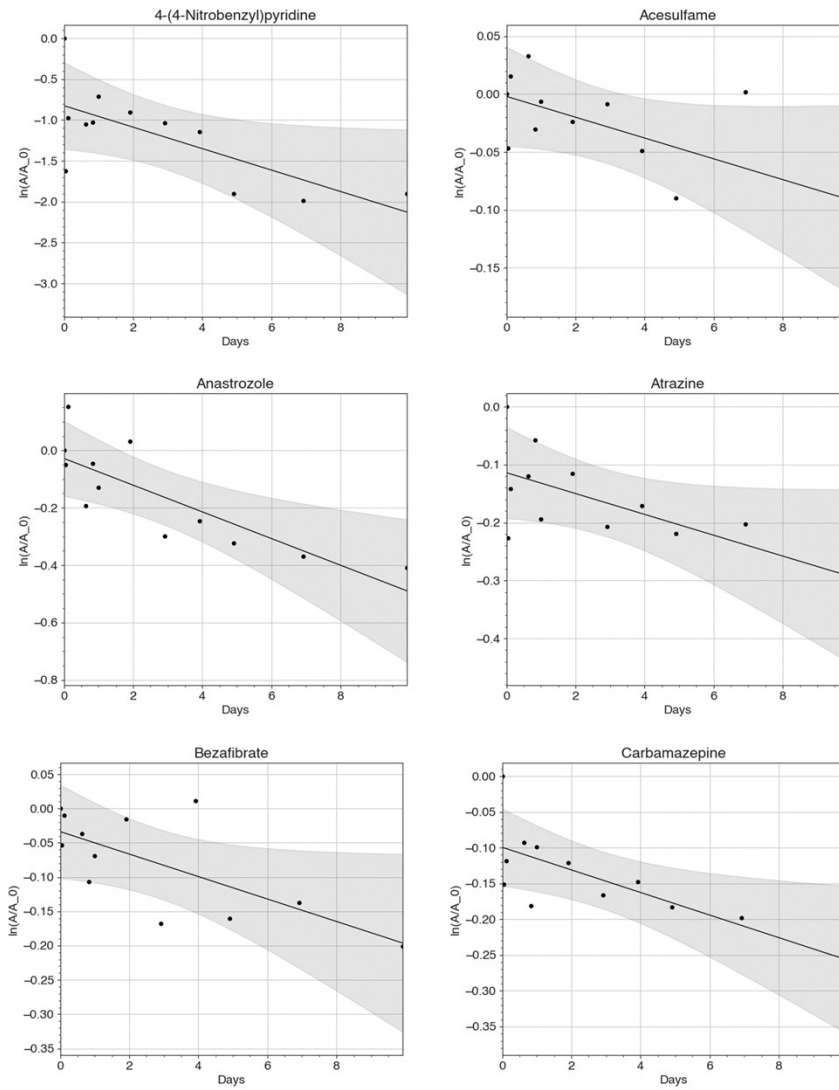

### aa) F9 replicate C (continued)

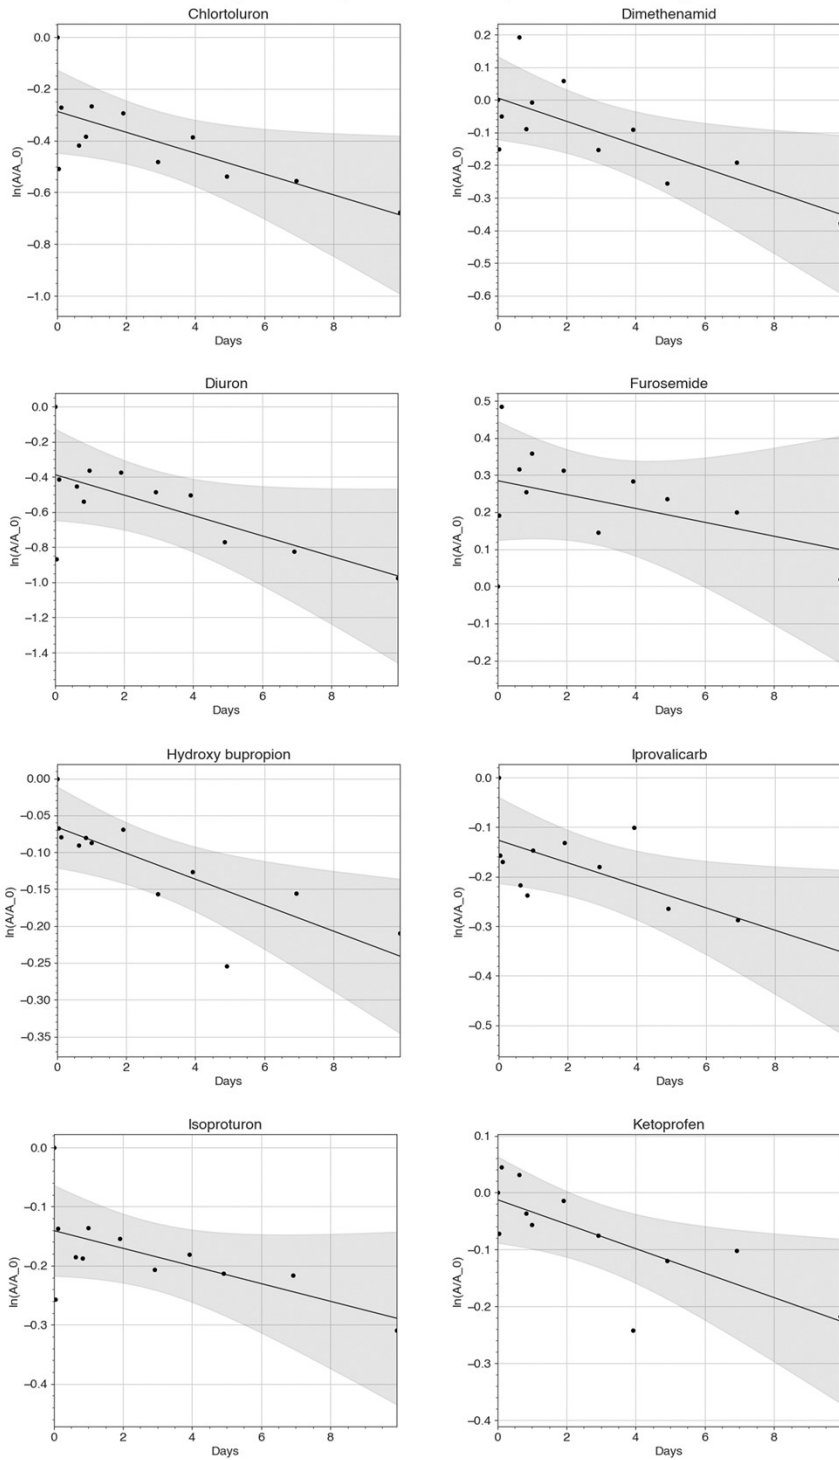

### aa) F9 replicate C (continued)

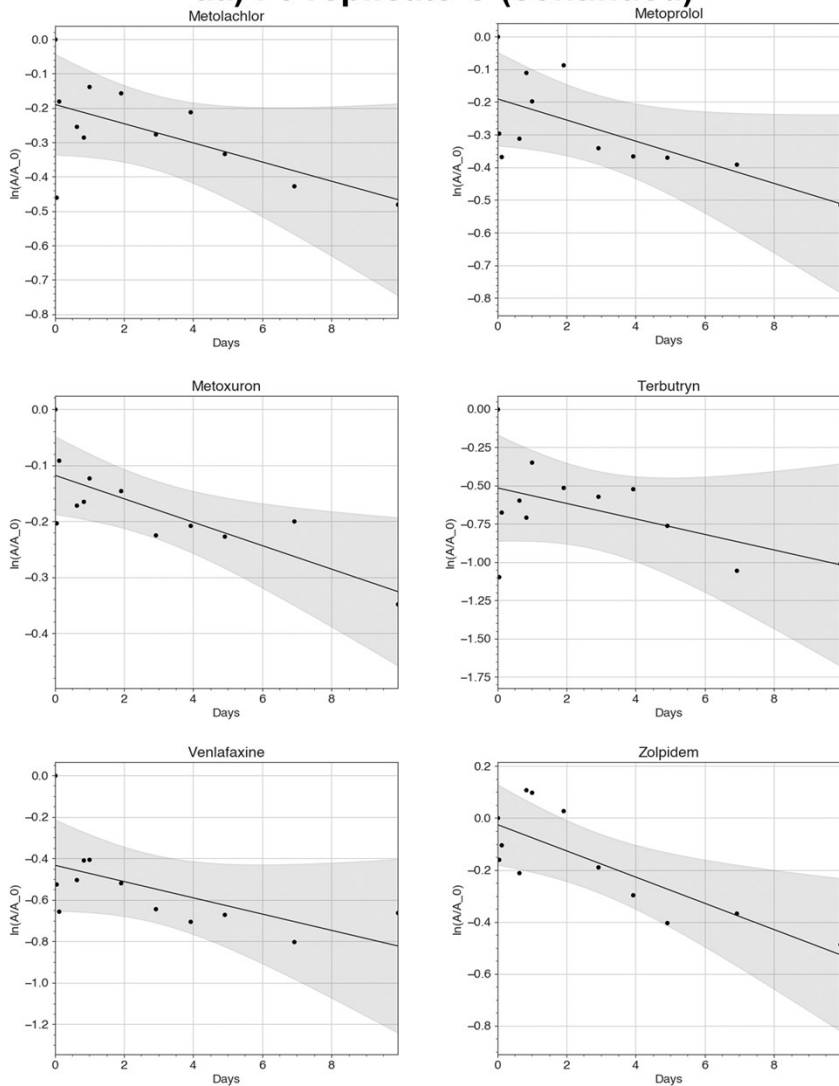

### ab) F10 replicate A

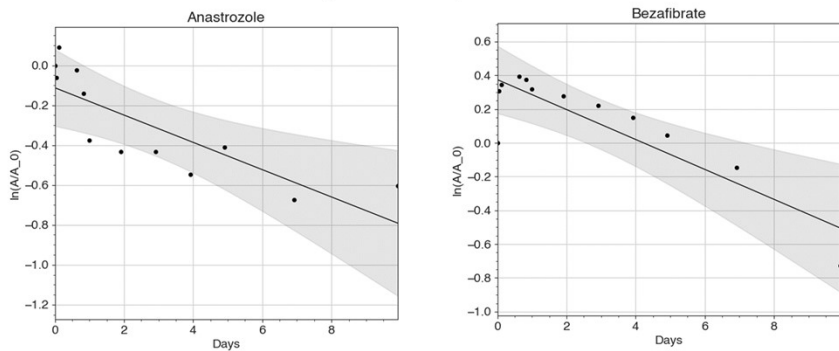

## ab) F10 replicate A (continued)

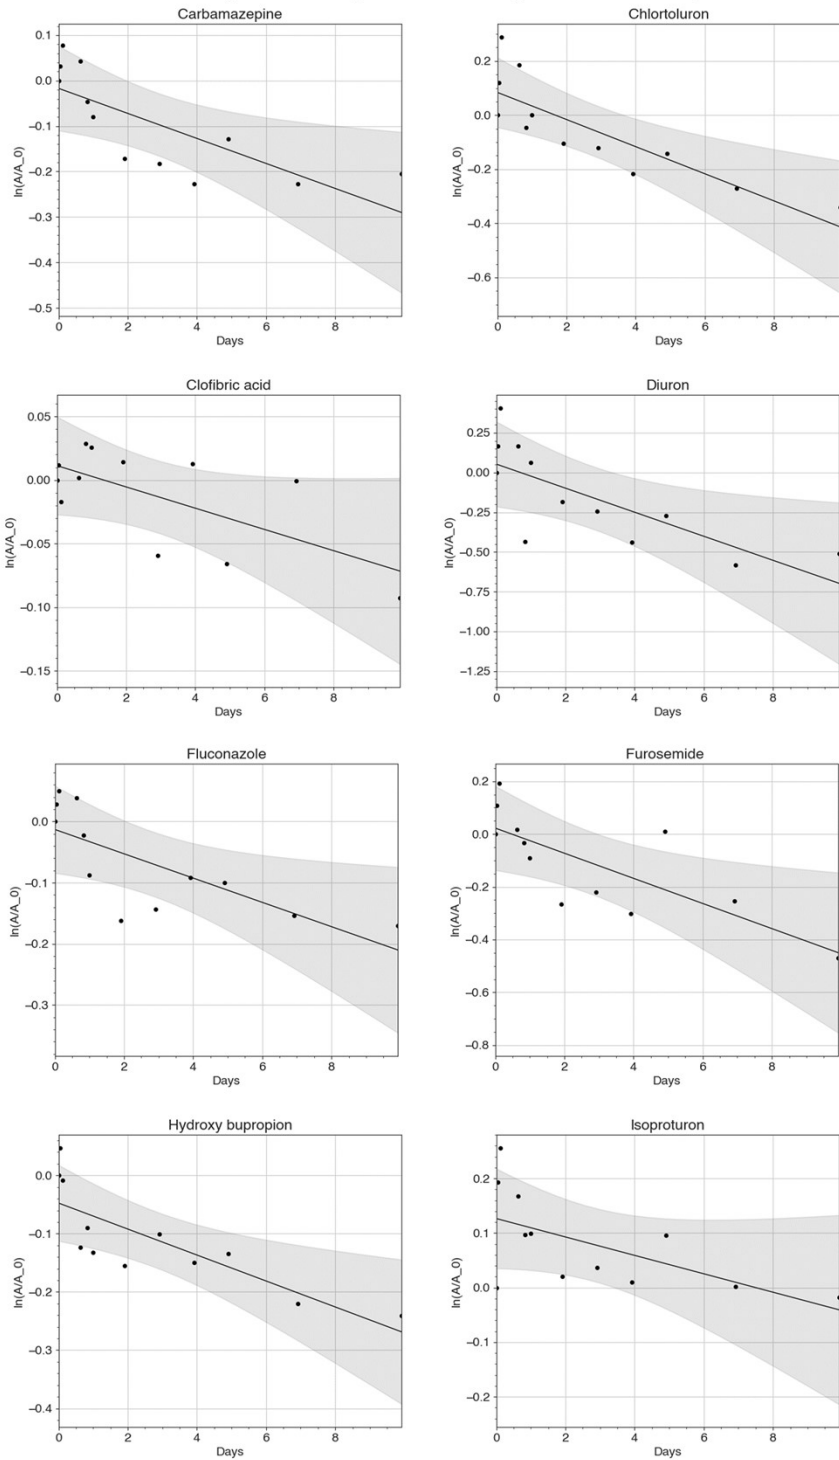

## ab) F10 replicate A (continued)

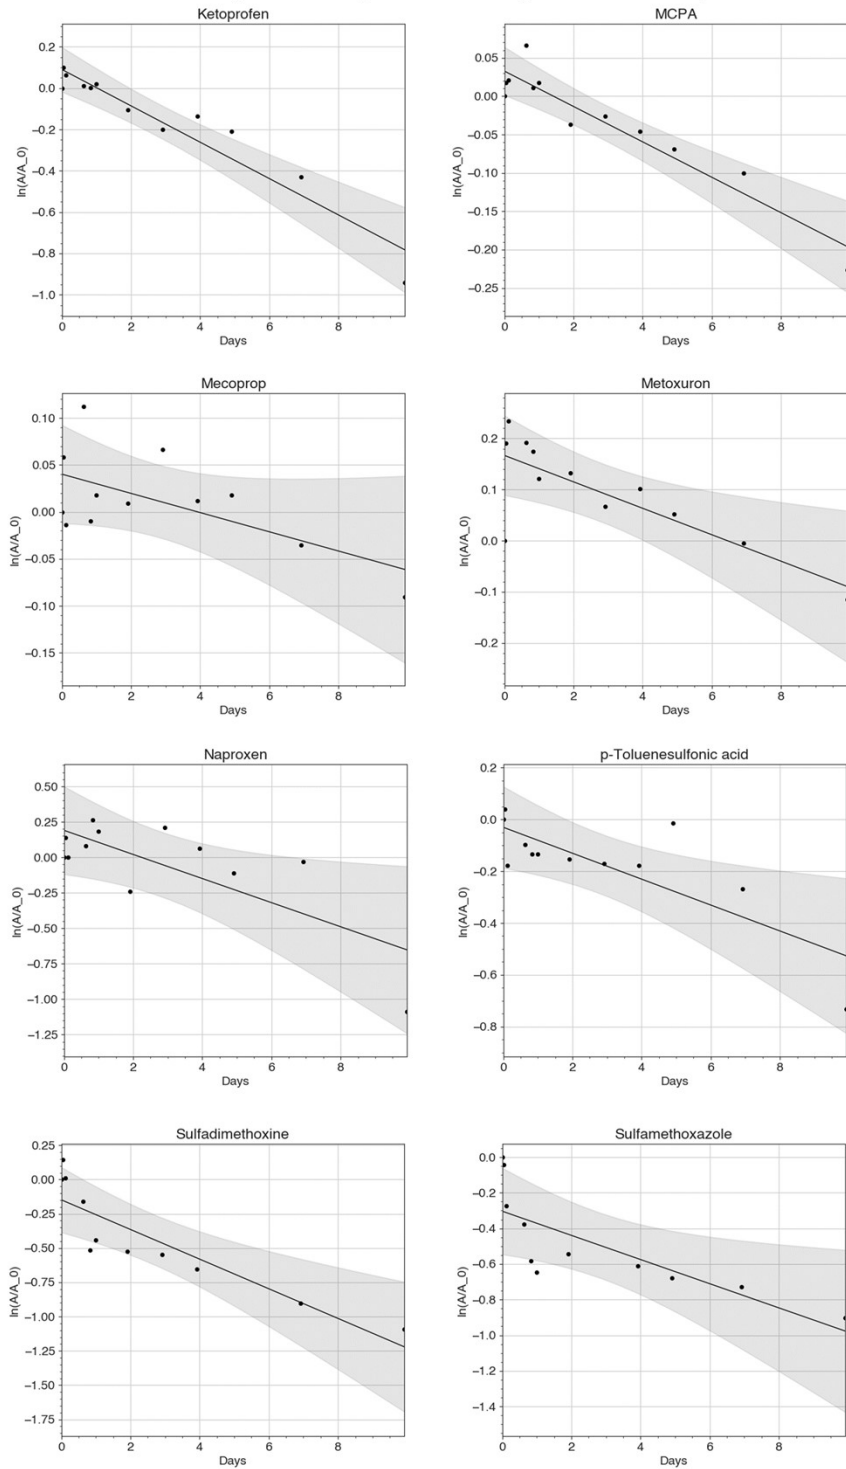

### ab) F10 replicate A (continued)

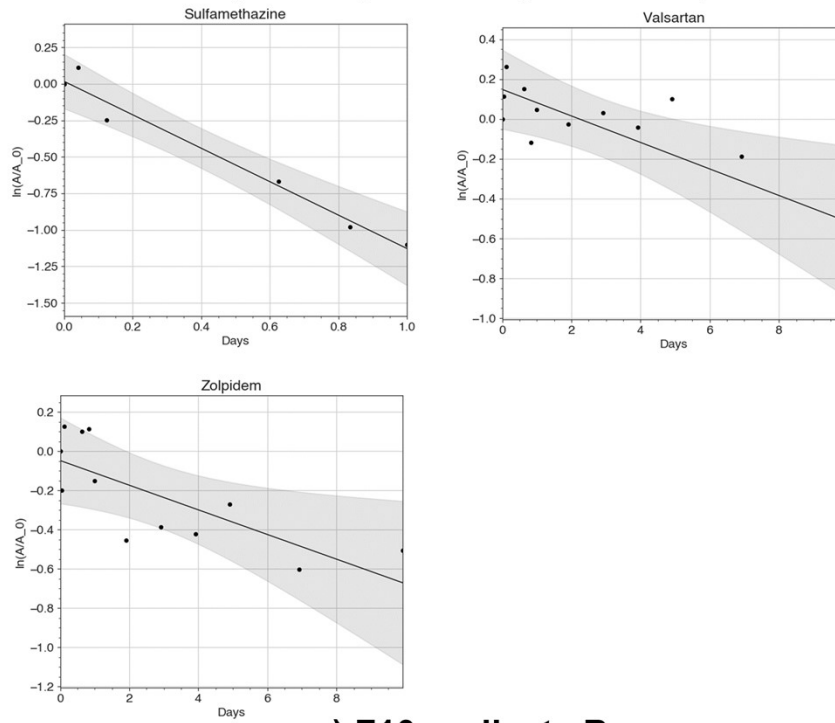

### ac) F10 replicate B

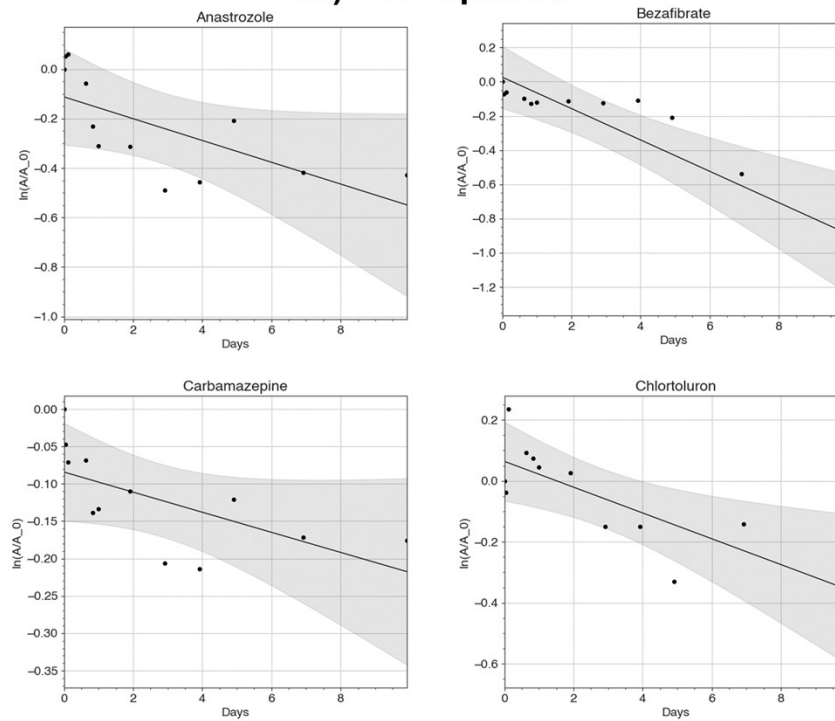

### ac) F10 replicate B (continued)

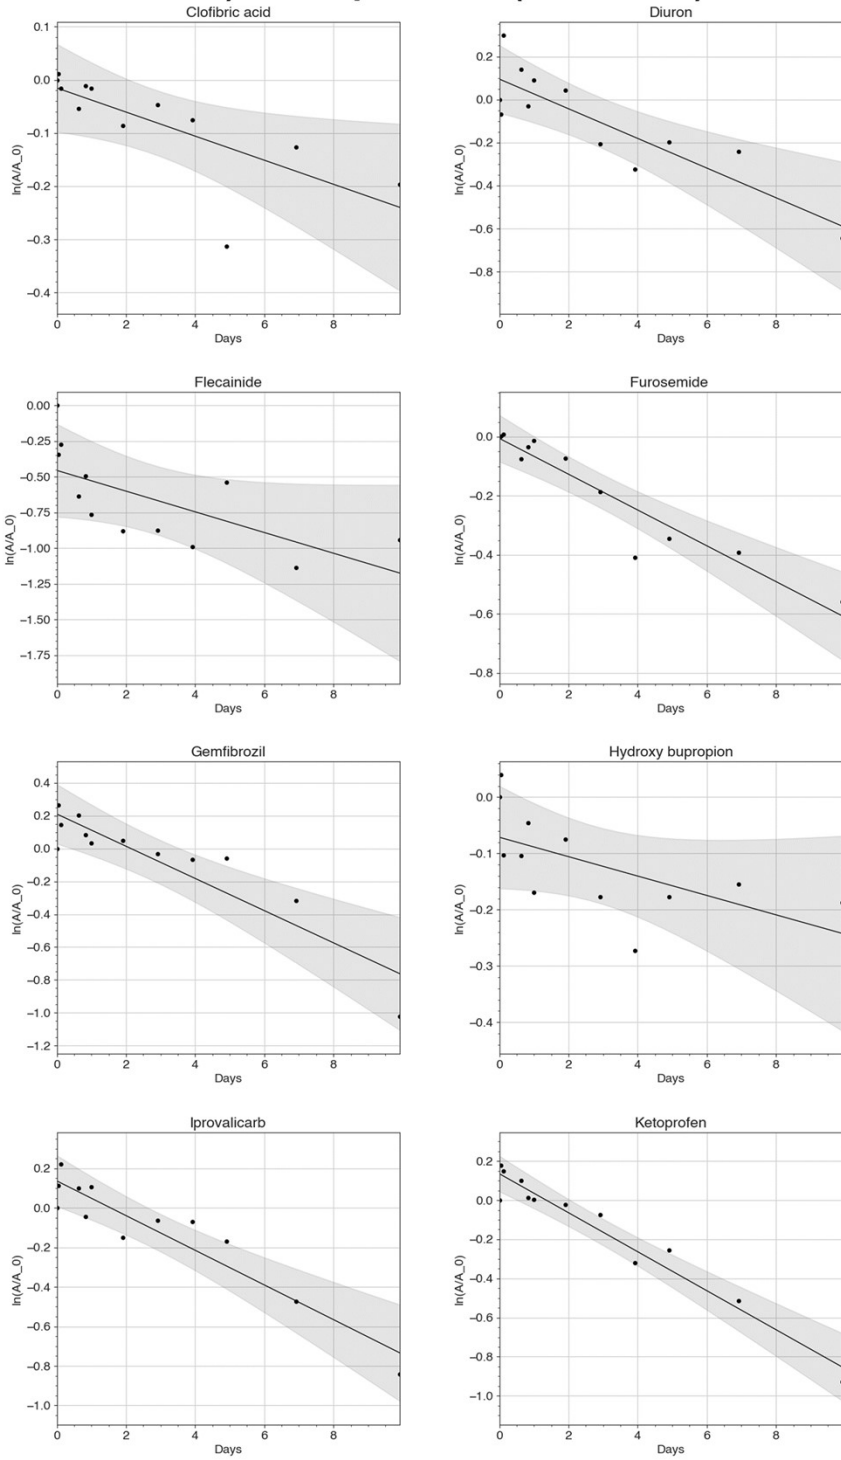

### ac) F10 replicate B (continued)

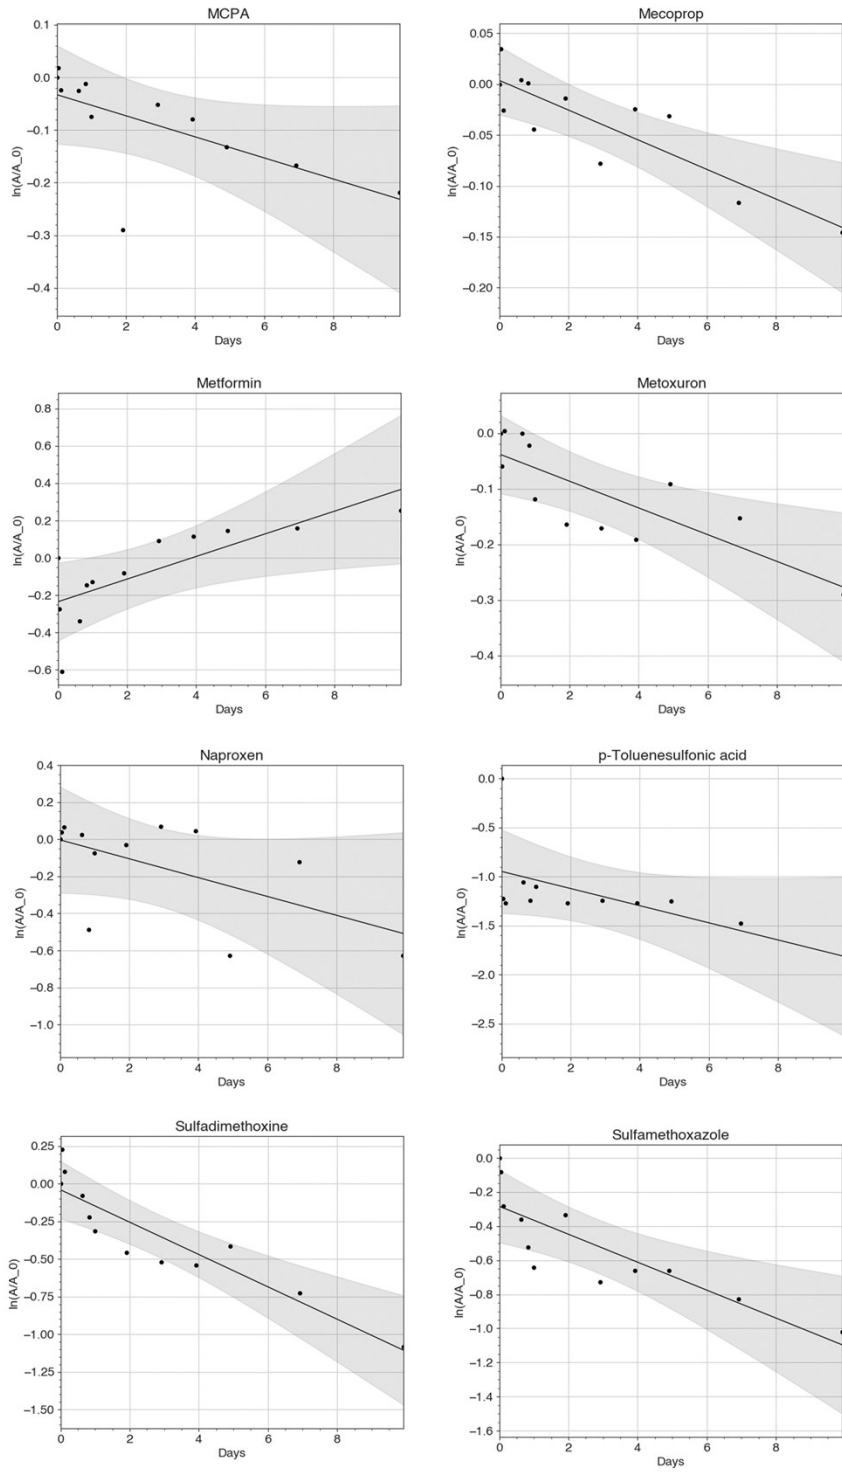

### ac) F10 replicate B (continued)

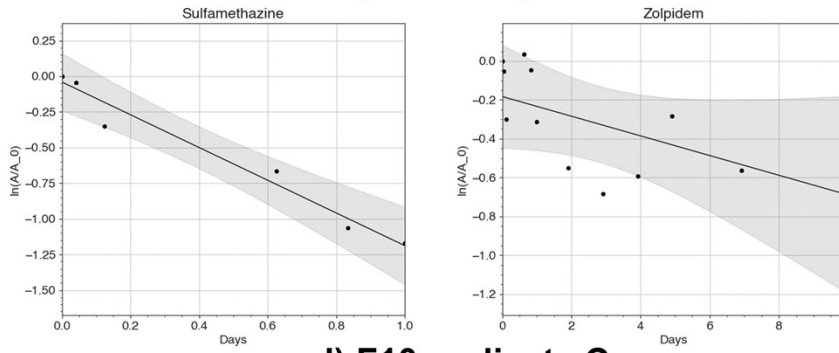

### ad) F10 replicate C

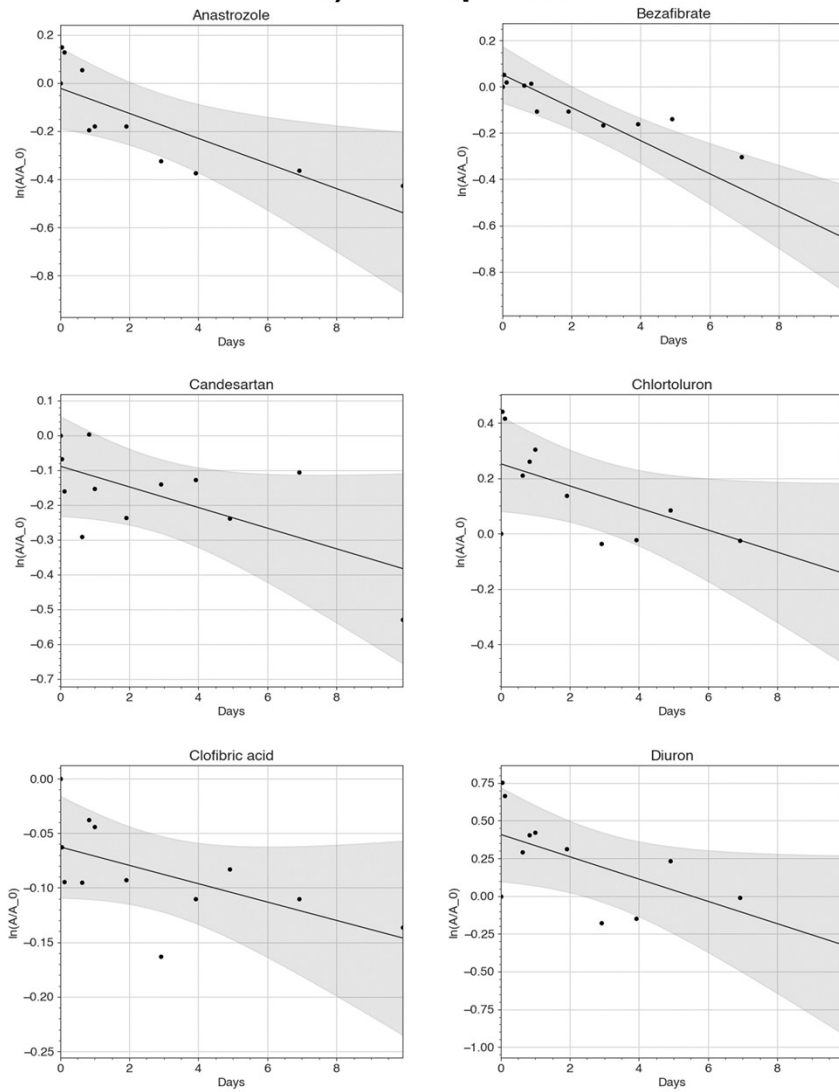

### ad) F10 replicate C (continued)

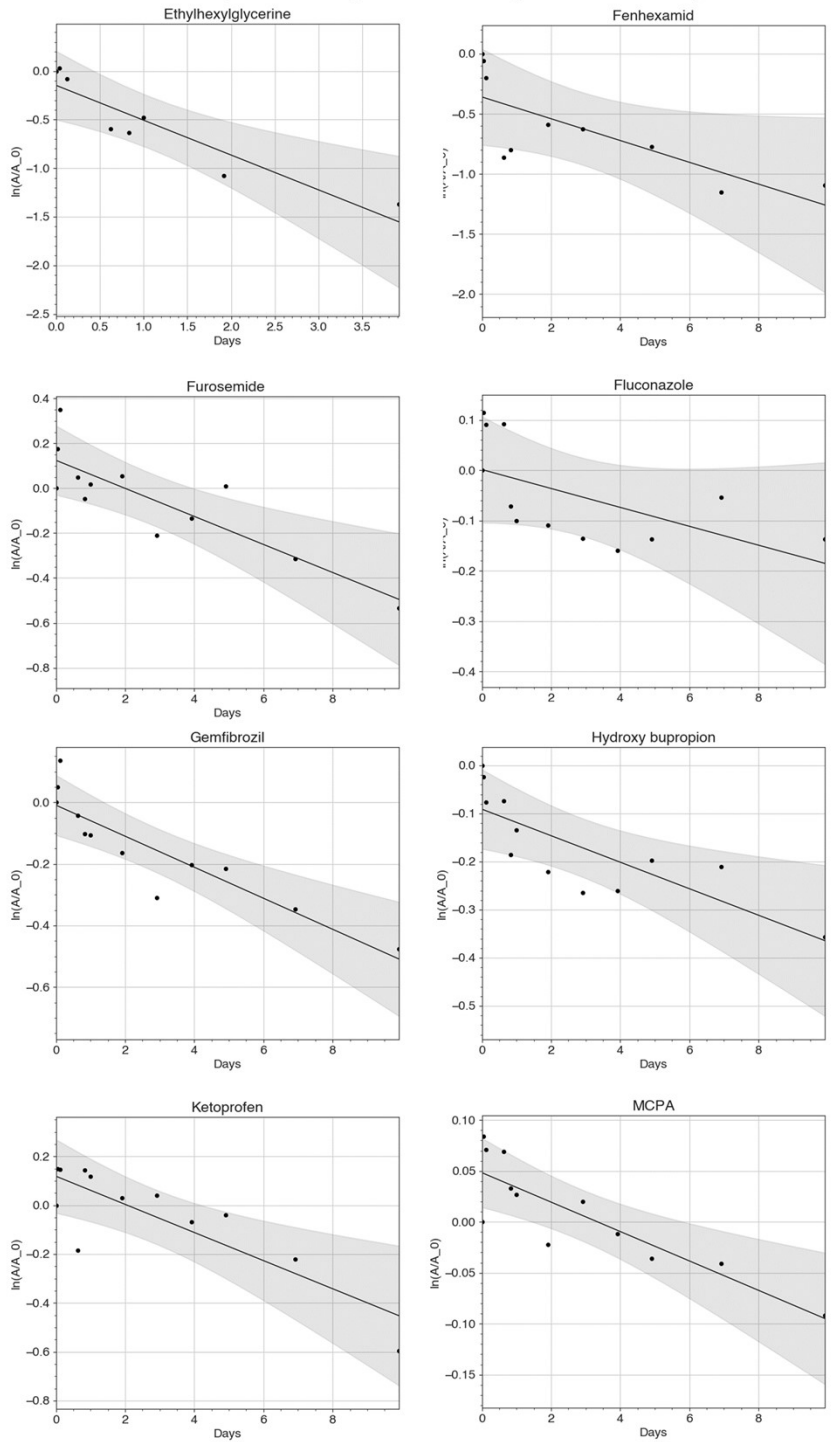

### ad) F10 replicate C (continued)

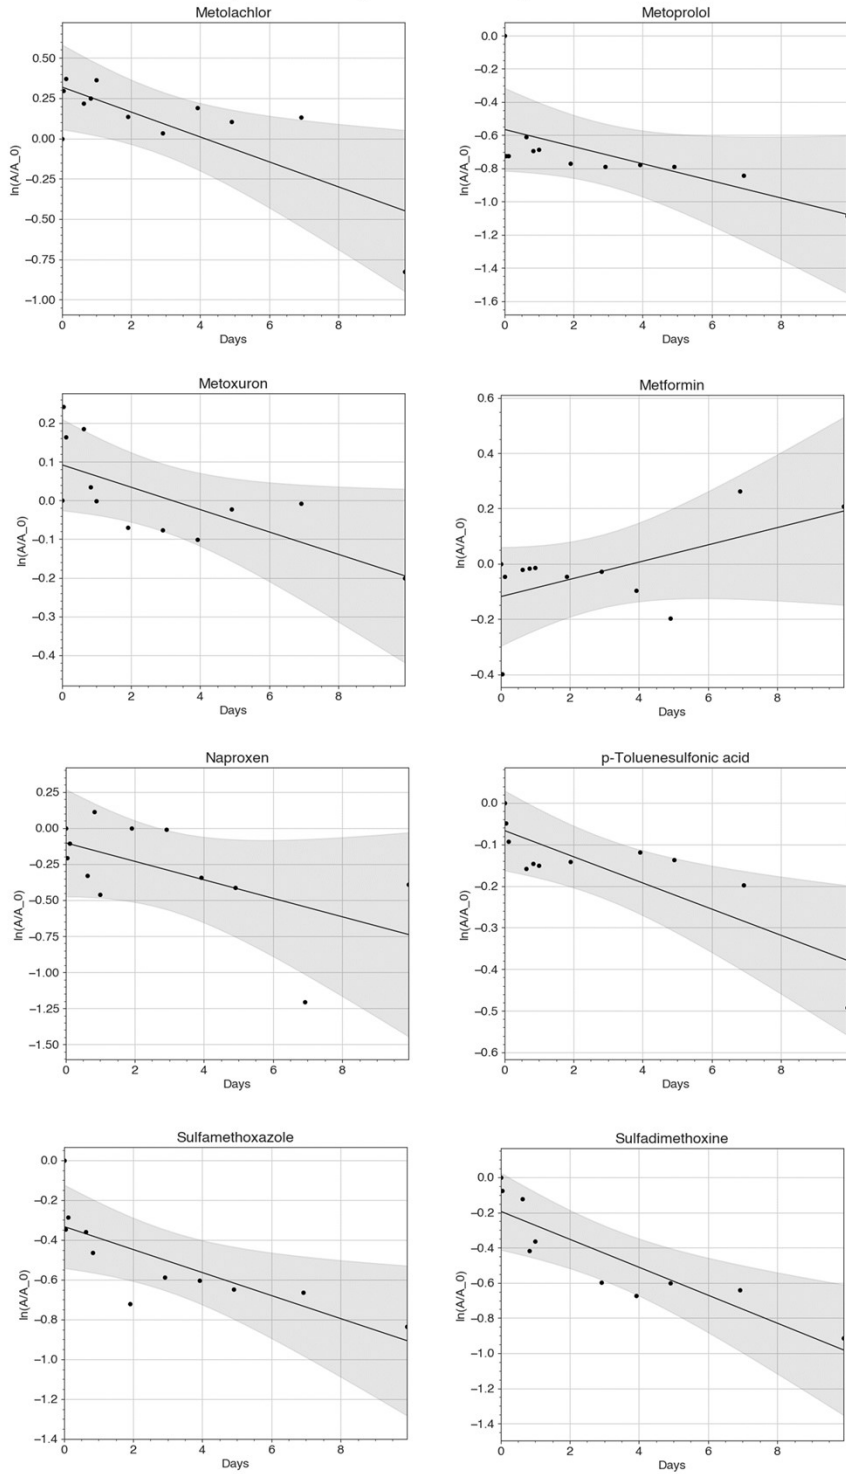

### ad) F10 replicate C (continued)

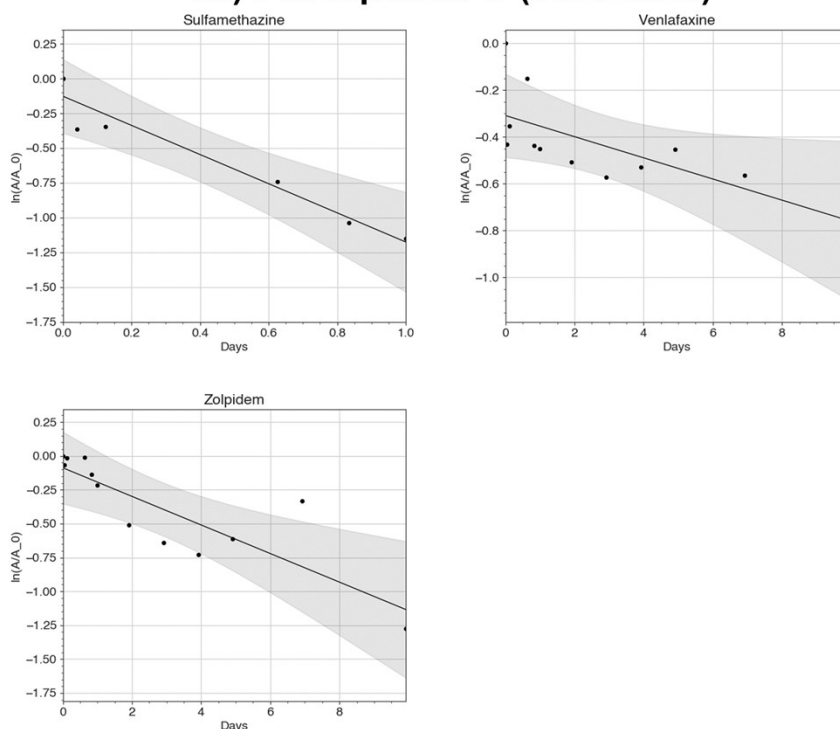

**Figure S3.** Relative peak area timeseries of the compounds with significant ( $p < 0.05$ ) dissipation for each replicate. Shaded area represents 99% confidence interval of the slope.

#### S2.4 Dissipation in abiotic controls

Some dissipation in at least one abiotic control was observed for 19 of the tested compounds. However, no compound dissipated in more than 3/5 abiotic controls, with most (11) compounds showing dissipation in only a single control. Combined with the fact that several of the compounds dissipating in the abiotic controls had very low  $\log D_{ow}$  (e.g., metoprolol, sulfadimethoxine, acesulfame), while some compounds that didn't dissipate in any abiotic control had a relatively high  $\log D_{ow}$  (e.g., iprovalicarb, dimethenamid) leads us to suspect this dissipation might be the result of residual biodegradation due to unsuccessful sterilization rather than sorption. Residual biodegradation was noted as a problem in a previous version of the modified OECD 309 method with sodium azide as the sterilization tool<sup>4</sup>. Autoclaving was attempted for this study as an alternative sterilization tool, but has since been noted here as well as in other not yet published experiments to appear unsuccessful at fully sterilizing the controls. Still, for the few compounds with a high  $\log D_{ow}$  that dissipated in several sorption controls (e.g. Anastrozole, Zolpidem) sorption may have played a role.

### a) F1 Abiotic control

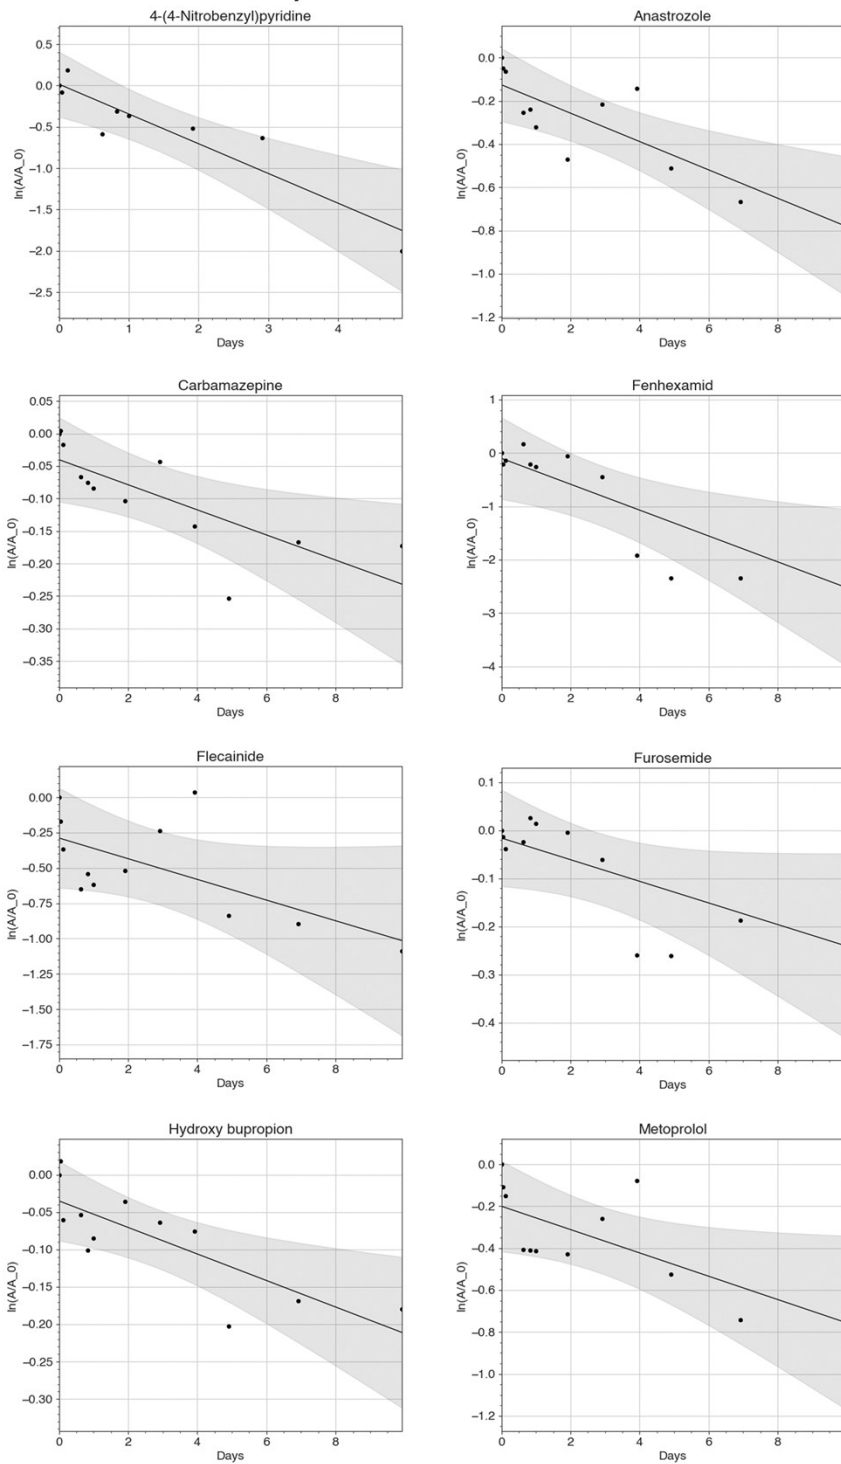

## b) F1 Abiotic control (continued)

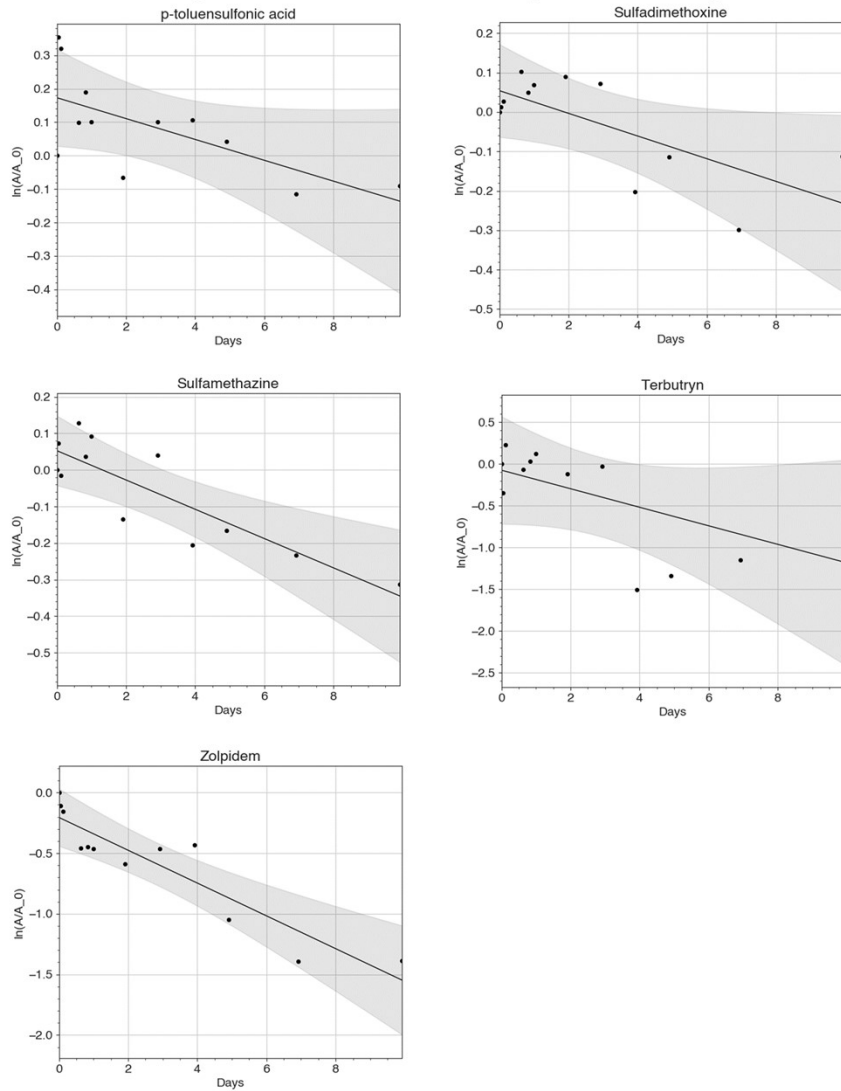

## a) F2 Abiotic control

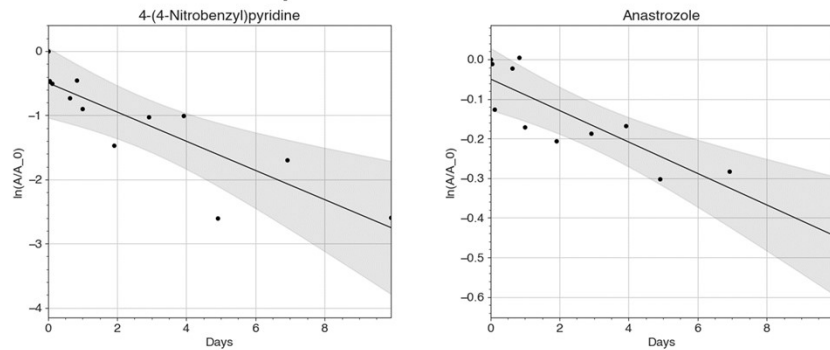

## b) F2 Abiotic control (continued)

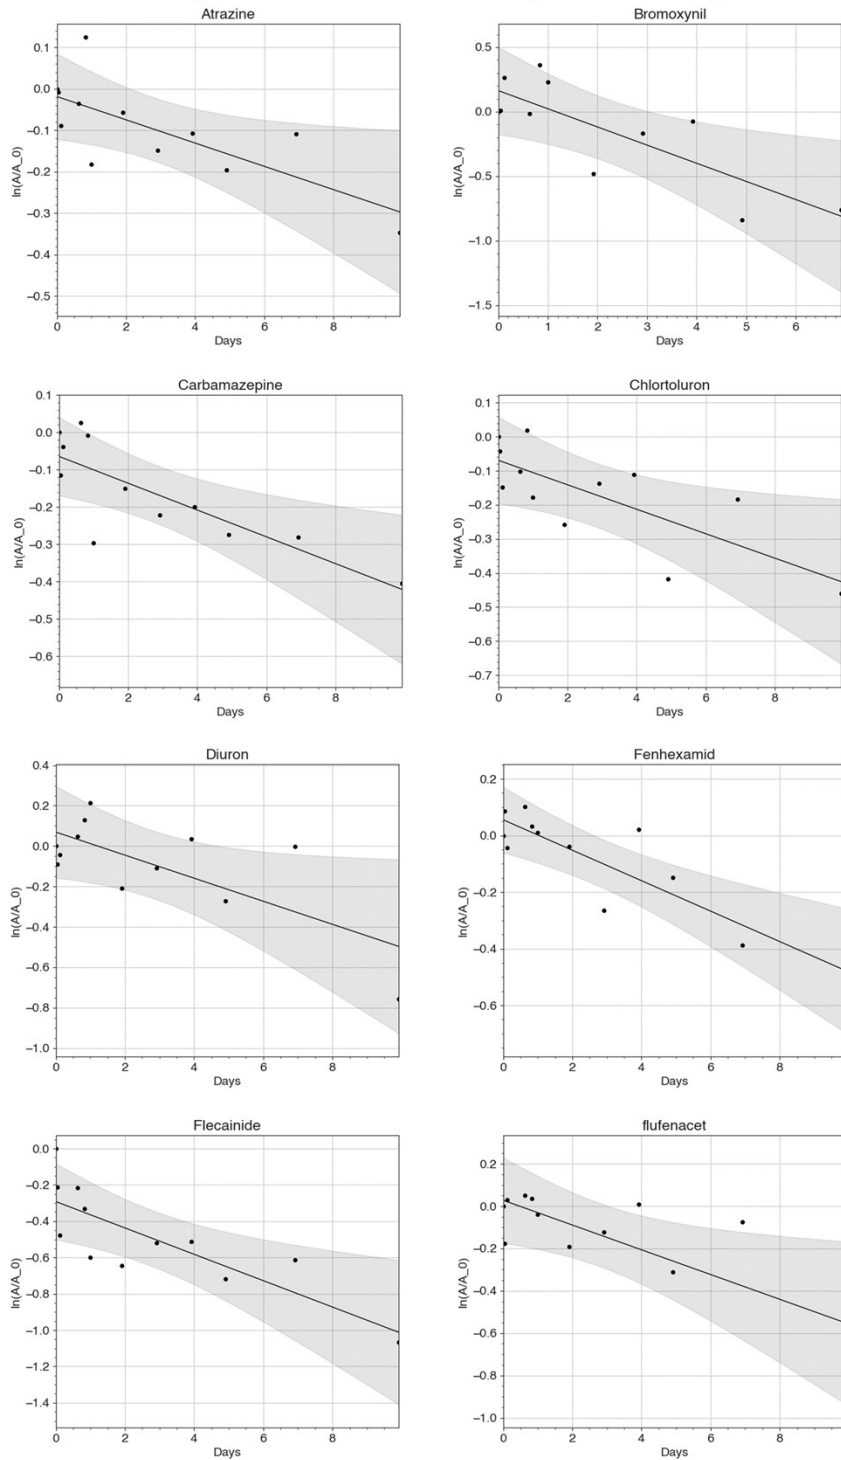

## b) F2 Abiotic control (continued)

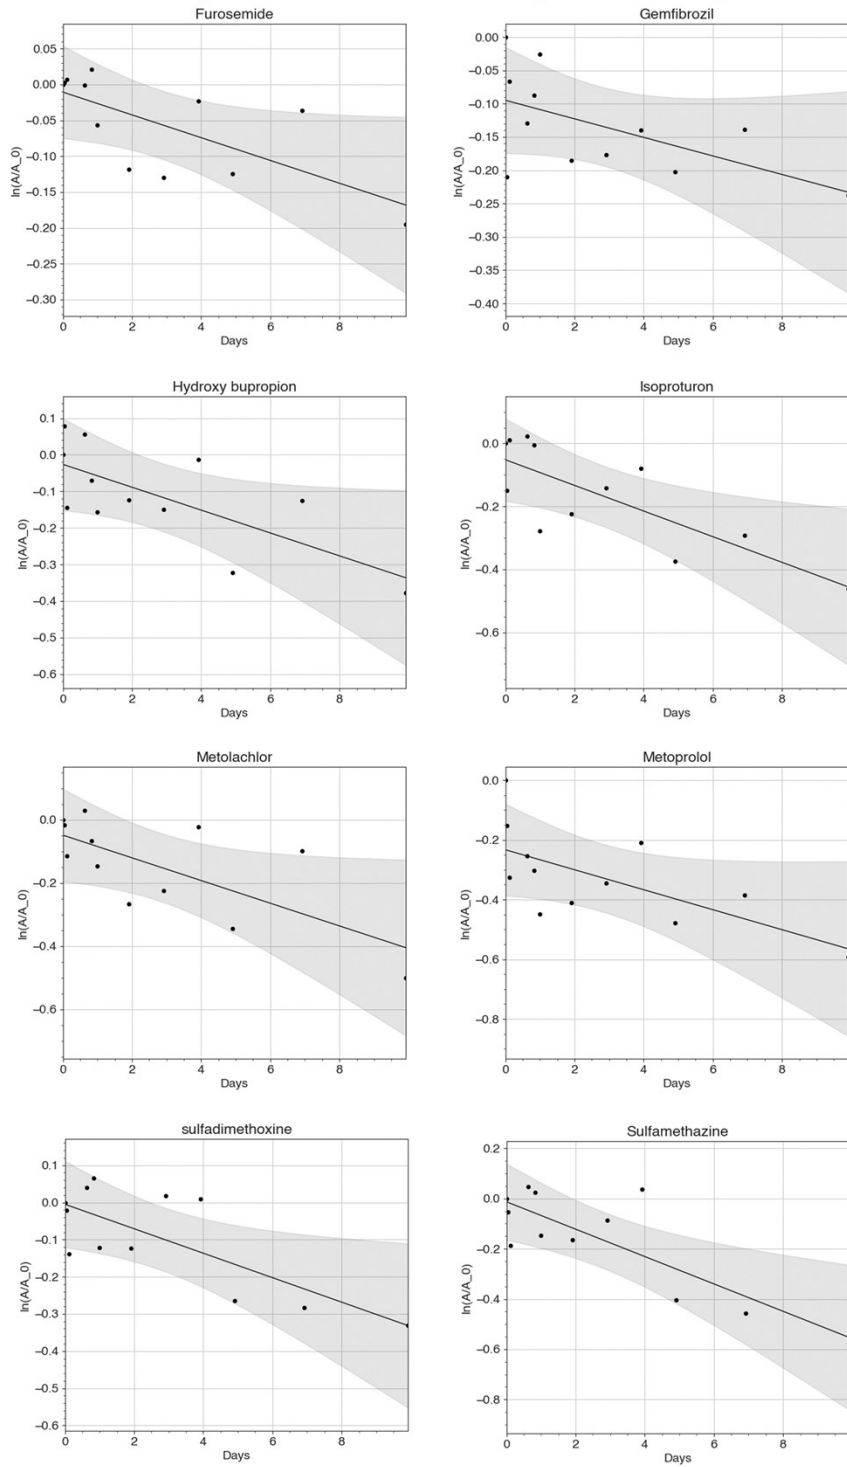

## b) F2 Abiotic control (continued)

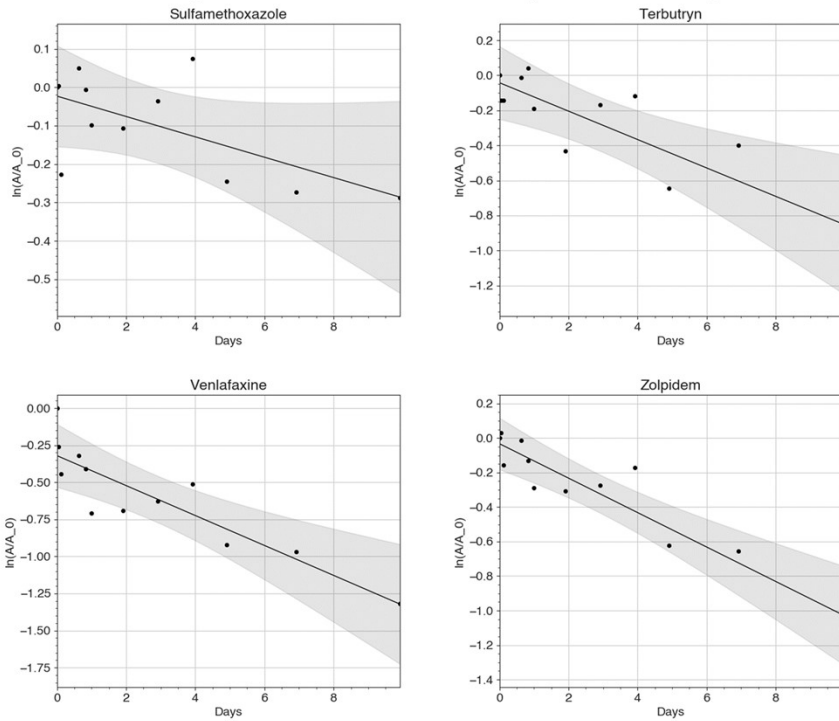

## b) F9 Abiotic control

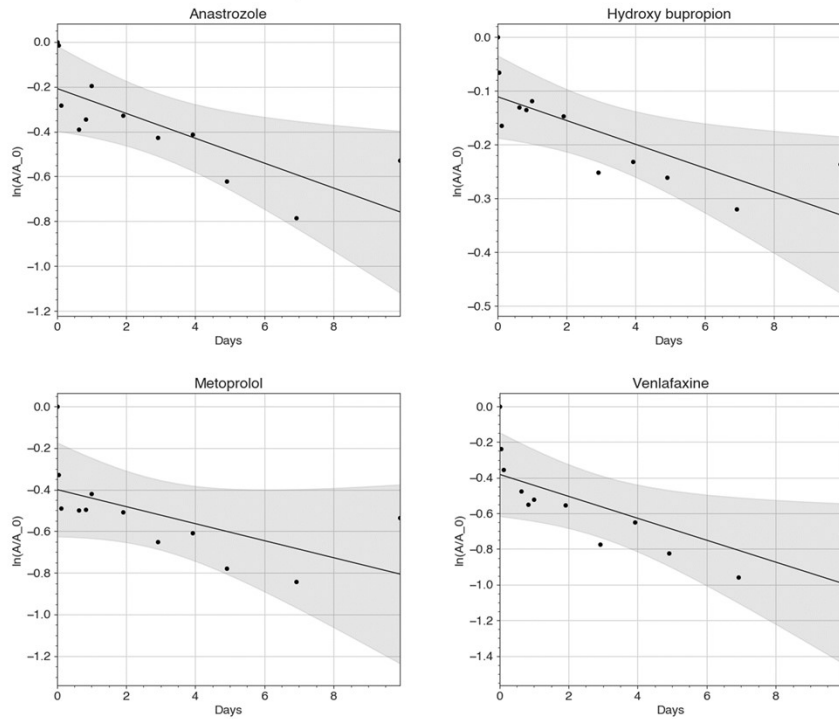

## b) F9 Abiotic control (continued)

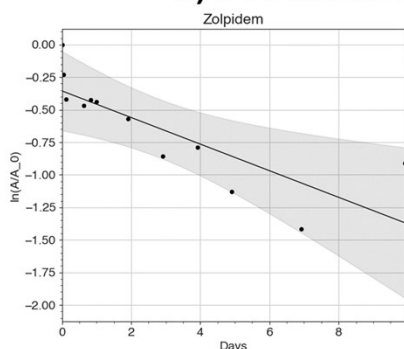

## b) F10 Abiotic control

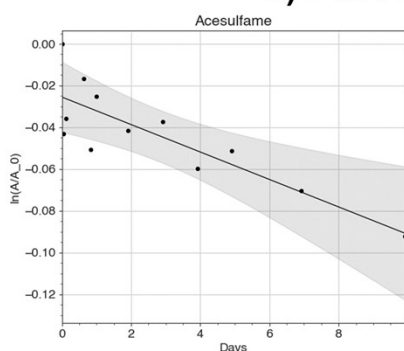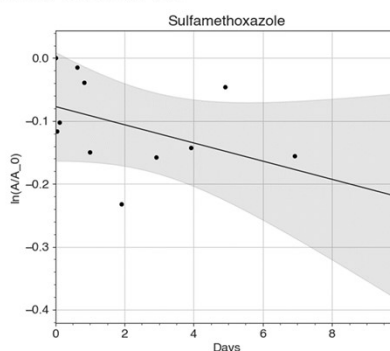

**Figure S4.** Relative peak area timeseries of the compounds with significant ( $p < 0.05$ ) dissipation in each abiotic control. No compound had significant dissipation in the abiotic control of site F8. Shaded area represents 99% confidence interval of the slope.

## S3. References

1. Tian, R., Posselt, M., Fenner, K. & McLachlan, M. S. Increasing the Environmental Relevance of Biodegradation Testing by Focusing on Initial Biodegradation Kinetics and Employing Low-Level Spiking. *Environ. Sci. Technol. Lett.* **10**, 40–45 (2023).
2. Tian, R., Posselt, M., Miaz, L. T., Fenner, K. & McLachlan, M. S. Influence of Season on Biodegradation Rates in Rivers. *Environ. Sci. Technol.* **58**, 7144–7153 (2024).
3. Brunius, C., Shi, L. & Landberg, R. Large-scale untargeted LC-MS metabolomics data correction using between-batch feature alignment and cluster-based within-batch signal intensity drift correction. *Metabolomics Off. J. Metabolomic Soc.* **12**, 173 (2016).
4. Weir, L. M., Tian, R., Posselt, M., Mueller, J. F. & McLachlan, M. S. From Freshwater to

Marine Environments: Spatial Variation in Chemical Biodegradation Rates Applying a Modified OECD 309-Type Experiment. *Environ. Sci. Technol.* **60**, 1141–1152 (2026).
